# Supplementary material for: MicroRNA-944 Affects Cell Growth by Targeting EPHA7 in Non-Small Cell Lung Cancer
Source: Int J Mol Sci. 2016 Sep 26;17(10):1493. doi: 10.3390/ijms17101493 (PMC5085614; doi:10.3390/ijms17101493)
Supplement: Supplementary file 1 [file ijms-17-01493-s001.zip]

Archive with 8 entries (8 files):
- Additional file 4.tif
- Additional file 5.tif
- Additional file 6.tif
- Additional file 7.pdf
- Additional file 8.pdf
- Additional file 1.xlsx
- Additional file 2.xls
- Additional file 3.pdf
