# Supplementary material for: MicroRNA-944 Affects Cell Growth by Targeting EPHA7 in Non-Small Cell Lung Cancer
Source: Int J Mol Sci. 2016 Sep 26;17(10):1493. doi: 10.3390/ijms17101493 (PMC5085614; doi:10.3390/ijms17101493)
Supplement: Supplementary file 1 [file ijms-17-01493-s001.zip › Additional file 1.xlsx]

## Sheet: 工作表1
Additional file 1. Dyregulated miRNAs in NSCLC cell line compared with immortalized human bronchial epithelial cell line (16HBE)
EPLC-32M1 vs 16HBE			801D vs16HBE			A549 vs 16HBE
Known miRNA			Known miRNA			Known miRNA
miR-name	Log2 Fold-change	sig-lable	miR-name	Log2 Fold-change	sig-lable	miRNA-name	Log2 Fold-change	sig-lable
hsa-let-7c	4.10342	**	hsa-let-7a-3p	-2.40147	**	hsa-let-7a-5p	-1.56874	**
hsa-let-7d-3p	1.49141	**	hsa-let-7b-5p	-2.29658	**	hsa-let-7b-5p	-2.56832	**
hsa-miR-100-5p	-1.61963	**	hsa-let-7i-5p	2.15119	**	hsa-let-7d-3p	-1.75726	**
hsa-miR-105-3p	8.59559	**	hsa-miR-1	1.5748	**	hsa-let-7d-5p	-1.69137	**
hsa-miR-105-5p	8.07714	**	hsa-miR-100-3p	5.63464	**	hsa-let-7f-5p	-1.48579	**
hsa-miR-10a-3p	4.44629	**	hsa-miR-100-5p	3.19353	**	hsa-let-7g-5p	-1.35557	**
hsa-miR-10a-5p	5.81574	**	hsa-miR-105-3p	8.03	**	hsa-let-7i-5p	1.25631	**
hsa-miR-10b-5p	8.91208	**	hsa-miR-105-5p	7.44501	**	hsa-miR-10a-3p	4.2888	**
hsa-miR-1180	1.50288	**	hsa-miR-106a-5p	6.98561	**	hsa-miR-10a-5p	4.62582	**
hsa-miR-1228-5p	3.17171	**	hsa-miR-10a-3p	6.7148	**	hsa-miR-10b-5p	8.62702	**
hsa-miR-1246	2.05882	**	hsa-miR-10a-5p	8.58108	**	hsa-miR-1180	2.43171	**
hsa-miR-1249	6.95513	**	hsa-miR-10b-5p	6.68608	**	hsa-miR-1224-5p	2.77908	**
hsa-miR-1250	4.50292	**	hsa-miR-1180	1.77838	**	hsa-miR-122-5p	2.42096	**
hsa-miR-1254	2.45323	**	hsa-miR-1185-1-3p	10.3344	**	hsa-miR-124-3p	2.95169	**
hsa-miR-1255a	3.11668	**	hsa-miR-1185-2-3p	9.23355	**	hsa-miR-1246	1.92618	**
hsa-miR-1255b-5p	2.2764	**	hsa-miR-1185-5p	9.79297	**	hsa-miR-1247-3p	8.1953	**
hsa-miR-1256	6.95513	**	hsa-miR-1193	9.36065	**	hsa-miR-1247-5p	7.93893	**
hsa-miR-125b-2-3p	8.4824	**	hsa-miR-1197	7.79299	**	hsa-miR-1254	1.50288	**
hsa-miR-1260b	4.43473	**	hsa-miR-1224-5p	5.79954	**	hsa-miR-1255a	-2.35505	**
hsa-miR-1262	2.33418	**	hsa-miR-122-5p	2.78289	**	hsa-miR-1255b-5p	1.62134	**
hsa-miR-126-5p	2.1244	**	hsa-miR-1228-5p	2.42288	**	hsa-miR-1260b	2.90544	**
hsa-miR-1266	-7.38716	**	hsa-miR-124-3p	5.32979	**	hsa-miR-1262	-1.81981	**
hsa-miR-1269b	3.69689	**	hsa-miR-1246	1.33546	*	hsa-miR-126-5p	2.11885	**
hsa-miR-1271-5p	7.18963	**	hsa-miR-1250	6.88617	**	hsa-miR-1266	1.73942	**
hsa-miR-1273d	6.67511	**	hsa-miR-1253	6.68608	**	hsa-miR-1268a	1.73877	**
hsa-miR-1275	1.26192	**	hsa-miR-1254	1.03144	**	hsa-miR-1268b	1.68215	**
hsa-miR-1277-3p	1.94685	**	hsa-miR-1255b-5p	2.27403	**	hsa-miR-127-3p	10.7115	**
hsa-miR-1277-5p	1.54662	**	hsa-miR-125b-1-3p	3.19837	**	hsa-miR-1275	2.74819	**
hsa-miR-1278	1.9811	**	hsa-miR-125b-5p	3.26476	**	hsa-miR-1278	1.27117	**
hsa-miR-1284	3.80242	**	hsa-miR-1260b	3.55266	**	hsa-miR-1285-3p	1.78352	**
hsa-miR-1285-3p	2.77766	**	hsa-miR-1262	1.8231	**	hsa-miR-1287	1.00338	*
hsa-miR-1287	1.96001	**	hsa-miR-126-3p	2.0903	**	hsa-miR-129-1-3p	-6.33985	**
hsa-miR-129-1-3p	-9.10962	**	hsa-miR-126-5p	3.26617	**	hsa-miR-1292-5p	2.73356	**
hsa-miR-1292-5p	2.38741	**	hsa-miR-1266	-7.38716	**	hsa-miR-1293	3.34764	**
hsa-miR-1293	4.84685	**	hsa-miR-1269a	14.395	**	hsa-miR-1294	2.28874	**
hsa-miR-129-5p	-8.94787	**	hsa-miR-1269b	-9.60439	**	hsa-miR-129-5p	-3.85702	**
hsa-miR-1299	-1.78269	*	hsa-miR-1273c	1.92039	*	hsa-miR-1299	3.08231	**
hsa-miR-1301	1.00644	**	hsa-miR-127-3p	14.6286	**	hsa-miR-1301	1.00946	**
hsa-miR-1303	3.21752	**	hsa-miR-1275	3.14278	**	hsa-miR-1303	2.76268	**
hsa-miR-1304-5p	2.68998	**	hsa-miR-127-5p	9.68606	**	hsa-miR-1306-3p	1.77423	**
hsa-miR-1306-3p	3.80247	**	hsa-miR-1277-3p	1.64974	**	hsa-miR-1306-5p	2.02577	*
hsa-miR-1306-5p	3.97237	**	hsa-miR-1278	1.27858	**	hsa-miR-132-3p	1.77423	**
hsa-miR-130a-3p	-4.44874	**	hsa-miR-128	1.2732	**	hsa-miR-134	8.3236	**
hsa-miR-130b-3p	1.37244	**	hsa-miR-1285-3p	2.60051	**	hsa-miR-135b-5p	-8.84659	**
hsa-miR-132-3p	1.48049	*	hsa-miR-1287	-2.78017	**	hsa-miR-136-5p	7.41287	**
hsa-miR-135b-5p	-2.17148	**	hsa-miR-129-1-3p	-3.80219	**	hsa-miR-137	8.52391	**
hsa-miR-137	8.77459	**	hsa-miR-129-2-3p	10.7823	**	hsa-miR-138-1-3p	2.70375	**
hsa-miR-138-5p	1.78228	**	hsa-miR-1292-5p	2.19342	**	hsa-miR-138-5p	3.03053	**
hsa-miR-139-3p	7.40373	**	hsa-miR-1294	1.50534	*	hsa-miR-139-3p	1.10236	*
hsa-miR-139-5p	11.1896	**	hsa-miR-129-5p	1.61518	**	hsa-miR-140-3p	3.41461	**
hsa-miR-140-3p	4.14384	**	hsa-miR-1299	-6.97212	**	hsa-miR-141-3p	-7.3977	**
hsa-miR-141-3p	-6.88383	**	hsa-miR-1303	3.79487	**	hsa-miR-146a-5p	8.38375	**
hsa-miR-146b-5p	-1.18495	**	hsa-miR-1304-5p	1.7684	**	hsa-miR-146b-5p	-1.64363	**
hsa-miR-148a-3p	-11.2795	**	hsa-miR-1306-3p	4.32639	**	hsa-miR-148a-3p	-4.92552	**
hsa-miR-148b-3p	1.10899	**	hsa-miR-1306-5p	5.34665	**	hsa-miR-148b-5p	1.79126	*
hsa-miR-148b-5p	2.80248	**	hsa-miR-130b-3p	3.259	**	hsa-miR-149-3p	2.41723	**
hsa-miR-152	1.35403	**	hsa-miR-130b-5p	1.44399	*	hsa-miR-154-3p	7.16138	**
hsa-miR-155-5p	8.40933	**	hsa-miR-132-3p	4.24233	**	hsa-miR-181a-2-3p	-1.13355	**
hsa-miR-15b-3p	1.48052	**	hsa-miR-132-5p	3.58336	**	hsa-miR-181c-3p	-2.17063	**
hsa-miR-17-3p	1.97239	**	hsa-miR-134	12.5799	**	hsa-miR-181c-5p	-1.29621	**
hsa-miR-17-5p	1.83648	**	hsa-miR-135b-5p	-1.53907	**	hsa-miR-181d	-1.24288	**
hsa-miR-181b-5p	1.41989	**	hsa-miR-136-3p	8.19505	**	hsa-miR-182-5p	-1.52859	**
hsa-miR-181c-3p	-2.07196	**	hsa-miR-136-5p	11.7405	**	hsa-miR-183-3p	-1.41164	**
hsa-miR-181c-5p	-1.53288	**	hsa-miR-137	9.57058	**	hsa-miR-183-5p	-2.04345	**
hsa-miR-181d	-1.21672	**	hsa-miR-139-3p	2.85329	**	hsa-miR-184	-5.15449	**
hsa-miR-184	-1.96808	**	hsa-miR-140-3p	4.65853	**	hsa-miR-191-3p	-1.46617	*
hsa-miR-185-3p	1.26714	**	hsa-miR-141-3p	-11.7517	**	hsa-miR-192-5p	3.99129	**
hsa-miR-185-5p	1.11883	**	hsa-miR-147b	3.00784	**	hsa-miR-193a-3p	-5.64632	**
hsa-miR-186-5p	2.14188	**	hsa-miR-148a-3p	-1.55246	**	hsa-miR-193a-5p	4.05429	**
hsa-miR-18a-3p	4.38738	**	hsa-miR-148b-5p	2.72776	**	hsa-miR-193b-3p	2.27338	**
hsa-miR-18a-5p	2.55092	**	hsa-miR-149-3p	4.56425	**	hsa-miR-193b-5p	3.92848	**
hsa-miR-1908	1.71393	**	hsa-miR-151a-3p	1.23625	**	hsa-miR-194-5p	3.99024	**
hsa-miR-193a-3p	-6.22031	**	hsa-miR-151a-5p	1.50535	**	hsa-miR-196a-5p	-1.14514	**
hsa-miR-193a-5p	4.10258	**	hsa-miR-152	-2.02934	**	hsa-miR-196b-3p	-4.20235	**
hsa-miR-193b-3p	3.30419	**	hsa-miR-153	5.47498	**	hsa-miR-196b-5p	-1.95515	**
hsa-miR-193b-5p	4.38449	**	hsa-miR-154-3p	10.9912	**	hsa-miR-197-5p	2.32529	**
hsa-miR-194-5p	1.12708	**	hsa-miR-154-5p	9.21444	**	hsa-miR-19a-3p	1.87376	*
hsa-miR-196a-3p	2.38738	**	hsa-miR-155-5p	9.47234	**	hsa-miR-200a-3p	4.28876	**
hsa-miR-196a-5p	2.70335	**	hsa-miR-15b-3p	1.40583	**	hsa-miR-200b-3p	1.70382	**
hsa-miR-197-3p	2.05544	**	hsa-miR-15b-5p	1.51702	**	hsa-miR-200b-5p	2.98919	**
hsa-miR-197-5p	4.10202	**	hsa-miR-16-2-3p	1.22417	**	hsa-miR-200c-3p	-7.69142	**
hsa-miR-19a-3p	2.26192	**	hsa-miR-17-3p	1.12025	**	hsa-miR-203a	-9.96257	**
hsa-miR-200c-3p	-7.06769	**	hsa-miR-181a-3p	1.00285	**	hsa-miR-205-3p	-6.76567	**
hsa-miR-203a	-4.00666	**	hsa-miR-181a-5p	1.22455	**	hsa-miR-205-5p	-15.5435	**
hsa-miR-205-3p	-6.76567	**	hsa-miR-181b-5p	1.4888	**	hsa-miR-206	4.76988	**
hsa-miR-205-5p	-12.6756	**	hsa-miR-184	-8.92321	**	hsa-miR-210	1.05573	**
hsa-miR-20a-5p	1.63874	**	hsa-miR-185-3p	2.14691	**	hsa-miR-21-3p	2.43531	**
hsa-miR-210	3.38579	**	hsa-miR-185-5p	1.83474	**	hsa-miR-215	1.55184	*
hsa-miR-2110	1.09248	**	hsa-miR-186-5p	1.90492	**	hsa-miR-222-3p	1.14446	**
hsa-miR-2116-3p	2.12433	*	hsa-miR-18a-5p	1.73597	**	hsa-miR-222-5p	5.28876	**
hsa-miR-21-3p	1.07454	**	hsa-miR-1908	2.21458	**	hsa-miR-224-5p	12.3689	**
hsa-miR-215	6.49734	**	hsa-miR-191-3p	1.9204	**	hsa-miR-23a-3p	-1.30677	**
hsa-miR-216b	10.4223	**	hsa-miR-191-5p	2.26492	**	hsa-miR-23a-5p	1.28123	**
hsa-miR-217	4.59254	**	hsa-miR-192-5p	7.71805	**	hsa-miR-23b-5p	1.35671	**
hsa-miR-219-1-3p	1.17171	*	hsa-miR-193a-5p	6.34833	**	hsa-miR-24-2-5p	-1.24275	**
hsa-miR-224-3p	8.0376	**	hsa-miR-193b-5p	1.1613	**	hsa-miR-25-5p	2.51722	**
hsa-miR-224-5p	13.9821	**	hsa-miR-195-5p	2.40805	**	hsa-miR-2682-5p	8.44145	**
hsa-miR-2355-3p	1.1435	**	hsa-miR-196a-5p	1.36566	**	hsa-miR-27b-3p	1.32793	**
hsa-miR-23a-5p	2.47489	**	hsa-miR-196b-3p	1.0135	*	hsa-miR-27b-5p	2.30637	**
hsa-miR-23b-3p	-1.25943	**	hsa-miR-196b-5p	1.29149	**	hsa-miR-28-3p	1.18185	**
hsa-miR-23b-5p	-1.22606	**	hsa-miR-197-3p	2.55266	**	hsa-miR-28-5p	1.00498	**
hsa-miR-25-3p	1.39534	**	hsa-miR-197-5p	3.88529	**	hsa-miR-29b-1-5p	1.64241	**
hsa-miR-25-5p	2.67583	**	hsa-miR-19b-3p	1.11304	**	hsa-miR-29c-3p	1.24735	**
hsa-miR-2682-5p	8.8219	**	hsa-miR-200c-3p	-9.6624	**	hsa-miR-301a-3p	-1.10355	**
hsa-miR-27a-5p	1.18946	**	hsa-miR-203a	-3.72436	**	hsa-miR-3064-5p	-1.44816	**
hsa-miR-28-3p	1.15039	**	hsa-miR-205-3p	-6.76567	**	hsa-miR-30b-5p	-1.58378	**
hsa-miR-2964a-3p	2.7411	**	hsa-miR-205-5p	-15.5435	**	hsa-miR-30c-1-3p	-1.08675	**
hsa-miR-29b-3p	-1.23782	**	hsa-miR-206	4.77838	**	hsa-miR-30c-2-3p	1.38398	**
hsa-miR-30a-3p	1.23779	**	hsa-miR-20b-3p	9.91636	**	hsa-miR-30d-5p	-1.4757	**
hsa-miR-30a-5p	1.59515	**	hsa-miR-20b-5p	8.74052	**	hsa-miR-30e-5p	-1.02626	**
hsa-miR-30b-3p	1.1646	**	hsa-miR-210	1.99359	**	hsa-miR-3121-3p	1.2888	*
hsa-miR-30c-2-3p	2.39444	**	hsa-miR-2110	1.26469	**	hsa-miR-3129-5p	10.2768	**
hsa-miR-3121-3p	2.44633	**	hsa-miR-212-3p	4.00784	**	hsa-miR-3131	6.85649	**
hsa-miR-3124-5p	1.7093	*	hsa-miR-212-5p	4.41225	**	hsa-miR-3138	1.17771	**
hsa-miR-3126-5p	2.60988	**	hsa-miR-21-3p	1.92039	**	hsa-miR-31-3p	5.28876	**
hsa-miR-3127-5p	2.36318	**	hsa-miR-21-5p	1.08117	**	hsa-miR-3143	1.95169	**
hsa-miR-3130-3p	1.1948	*	hsa-miR-221-3p	1.94924	**	hsa-miR-3144-5p	7.16138	**
hsa-miR-3138	1.49052	**	hsa-miR-222-3p	2.20333	**	hsa-miR-3153	3.61066	**
hsa-miR-31-3p	3.05039	**	hsa-miR-222-5p	5.31272	**	hsa-miR-31-5p	4.28362	**
hsa-miR-3143	3.4749	**	hsa-miR-224-5p	9.49342	**	hsa-miR-3165	-1.3956	*
hsa-miR-3153	2.80242	**	hsa-miR-2277-5p	8.60032	**	hsa-miR-3173-3p	7.09096	**
hsa-miR-31-5p	2.54324	**	hsa-miR-23a-5p	2.00786	**	hsa-miR-3179	7.46948	**
hsa-miR-3162-5p	2.97237	**	hsa-miR-23b-3p	-2.65325	**	hsa-miR-3183	7.01692	**
hsa-miR-3163	1.53944	*	hsa-miR-23b-5p	-2.70062	**	hsa-miR-3190-3p	1.17327	**
hsa-miR-3164	1.8899	*	hsa-miR-25-3p	1.44343	**	hsa-miR-3192	3.32118	**
hsa-miR-3165	-1.29715	*	hsa-miR-25-5p	2.07452	**	hsa-miR-320c	1.69841	**
hsa-miR-3173-3p	7.32715	**	hsa-miR-2682-5p	10.6721	**	hsa-miR-320d	3.40425	**
hsa-miR-3175	3.97237	**	hsa-miR-27b-3p	-1.46235	**	hsa-miR-323a-3p	5.53035	**
hsa-miR-3179	7.56811	**	hsa-miR-27b-5p	-2.44753	**	hsa-miR-323a-5p	7.76904	**
hsa-miR-3192	2.71806	**	hsa-miR-28-3p	1.58138	**	hsa-miR-323b-3p	4.8331	**
hsa-miR-3193	1.5187	*	hsa-miR-28-5p	1.88122	**	hsa-miR-324-5p	-1.2614	**
hsa-miR-320a	1.5705	**	hsa-miR-296-3p	8.30757	**	hsa-miR-329	3.13007	**
hsa-miR-320b	2.60418	**	hsa-miR-2964a-3p	2.85903	**	hsa-miR-330-3p	-1.07234	**
hsa-miR-320c	4.11683	**	hsa-miR-296-5p	10.4532	**	hsa-miR-331-3p	1.26948	**
hsa-miR-320d	5.55736	**	hsa-miR-299-3p	8.89251	**	hsa-miR-335-5p	-1.14511	**
hsa-miR-324-3p	2.60988	**	hsa-miR-299-5p	10.4202	**	hsa-miR-33a-5p	-2.83895	**
hsa-miR-330-3p	1.05085	**	hsa-miR-301b	2.50539	**	hsa-miR-34b-5p	-1.02317	**
hsa-miR-339-3p	-1.51011	**	hsa-miR-3065-3p	7.57061	**	hsa-miR-3605-5p	-1.7881	**
hsa-miR-33b-5p	1.65045	*	hsa-miR-3065-5p	3.64285	**	hsa-miR-3615	-1.75568	**
hsa-miR-340-5p	1.06408	**	hsa-miR-3074-3p	6.68608	**	hsa-miR-361-5p	-1.02488	**
hsa-miR-342-3p	-5.01274	**	hsa-miR-30c-2-3p	1.08374	**	hsa-miR-362-3p	2.02577	*
hsa-miR-342-5p	-5.51926	**	hsa-miR-3131	7.68608	**	hsa-miR-3648	8.60192	**
hsa-miR-34b-5p	-8.65019	**	hsa-miR-3138	2.79487	**	hsa-miR-3654	7.16138	**
hsa-miR-34c-5p	-9.54132	**	hsa-miR-31-3p	4.50535	**	hsa-miR-365a-3p	3.4356	**
hsa-miR-362-3p	3.38741	**	hsa-miR-3140-3p	-1.66469	*	hsa-miR-365a-5p	4.96526	**
hsa-miR-365a-3p	4.25115	**	hsa-miR-3141	2.64088	**	hsa-miR-365b-3p	3.4356	**
hsa-miR-365a-5p	4.6913	**	hsa-miR-3147	7.3779	**	hsa-miR-365b-5p	6.00301	**
hsa-miR-365b-3p	4.25115	**	hsa-miR-3152-3p	7.3779	**	hsa-miR-3664-3p	1.94326	**
hsa-miR-365b-5p	5.03128	**	hsa-miR-31-5p	4.67803	**	hsa-miR-3676-3p	3.37622	**
hsa-miR-3660	10.0869	**	hsa-miR-3164	3.27796	**	hsa-miR-3679-5p	5.06137	**
hsa-miR-3664-3p	-7.23515	**	hsa-miR-3175	3.65738	**	hsa-miR-3687	7.30372	**
hsa-miR-3676-3p	1.97237	**	hsa-miR-3179	8.89251	**	hsa-miR-3690	8.1953	**
hsa-miR-3679-5p	5.95222	**	hsa-miR-3180	10.0624	**	hsa-miR-369-3p	9.09096	**
hsa-miR-3690	9.72567	**	hsa-miR-3180-3p	10.0517	**	hsa-miR-369-5p	6.85649	**
hsa-miR-3691-5p	2.05039	**	hsa-miR-3180-5p	11.0355	**	hsa-miR-374a-3p	2.23311	**
hsa-miR-374a-3p	1.82567	**	hsa-miR-3192	3.22914	**	hsa-miR-374a-5p	1.71601	**
hsa-miR-374a-5p	1.82438	**	hsa-miR-3200-5p	2.92039	**	hsa-miR-374b-3p	3.41346	**
hsa-miR-374b-3p	2.97239	**	hsa-miR-320a	1.73048	**	hsa-miR-374b-5p	1.89605	**
hsa-miR-374b-5p	2.48133	**	hsa-miR-320c	2.5443	**	hsa-miR-375	3.72616	**
hsa-miR-378a-3p	2.03473	**	hsa-miR-320d	3.6753	**	hsa-miR-376c-3p	4.40425	**
hsa-miR-378c	1.6788	**	hsa-miR-323a-3p	8.92286	**	hsa-miR-378a-3p	1.63757	**
hsa-miR-378d	2.67696	**	hsa-miR-323a-5p	10.9912	**	hsa-miR-379-5p	4.28877	**
hsa-miR-383	7.86771	**	hsa-miR-323b-3p	8.54244	**	hsa-miR-382-3p	4.30865	**
hsa-miR-3928	2.49052	**	hsa-miR-324-3p	2.92039	**	hsa-miR-382-5p	5.97992	**
hsa-miR-3934-5p	2.65045	**	hsa-miR-324-5p	1.3442	**	hsa-miR-3934-5p	1.33606	**
hsa-miR-3936	2.21746	**	hsa-miR-32-5p	1.17624	**	hsa-miR-3935	-7.52466	**
hsa-miR-421	2.92735	**	hsa-miR-328	4.50539	**	hsa-miR-3936	2.2888	**
hsa-miR-423-3p	1.09904	**	hsa-miR-329	7.18013	**	hsa-miR-409-3p	5.81233	**
hsa-miR-423-5p	1.42439	**	hsa-miR-330-3p	1.42648	**	hsa-miR-409-5p	7.67589	**
hsa-miR-424-3p	1.90038	**	hsa-miR-331-3p	2.15821	**	hsa-miR-411-5p	8.5504	**
hsa-miR-4286	3.06781	**	hsa-miR-335-3p	-1.78017	*	hsa-miR-421	1.74167	**
hsa-miR-4421	2.18095	**	hsa-miR-335-5p	-3.52996	**	hsa-miR-424-3p	2.48781	**
hsa-miR-4425	8.90575	**	hsa-miR-337-3p	8.44506	**	hsa-miR-424-5p	1.52094	**
hsa-miR-4427	7.26003	**	hsa-miR-337-5p	7.98561	**	hsa-miR-432-5p	13.6378	**
hsa-miR-4435	1.59096	**	hsa-miR-338-3p	8.50918	**	hsa-miR-433	8.38375	**
hsa-miR-4436b-3p	7.99695	**	hsa-miR-339-3p	2.04592	**	hsa-miR-4436b-3p	8.8351	**
hsa-miR-4466	2.26192	**	hsa-miR-339-5p	2.20727	**	hsa-miR-4488	8.95884	**
hsa-miR-449c-5p	2.05882	**	hsa-miR-340-5p	1.80545	**	hsa-miR-449c-5p	2.08844	**
hsa-miR-4501	7.18963	**	hsa-miR-342-3p	1.15121	**	hsa-miR-450a-3p	4.65799	**
hsa-miR-4508	6.95513	**	hsa-miR-342-5p	1.12203	**	hsa-miR-450a-5p	1.89646	**
hsa-miR-450a-3p	2.7093	**	hsa-miR-346	7.23352	**	hsa-miR-450b-5p	2.13007	**
hsa-miR-450a-5p	1.24303	*	hsa-miR-34a-5p	-1.60315	**	hsa-miR-4521	1.90544	**
hsa-miR-452-3p	7.45261	**	hsa-miR-34b-5p	-3.66469	**	hsa-miR-4525	4.40425	**
hsa-miR-4525	3.80242	**	hsa-miR-34c-5p	-3.57786	**	hsa-miR-452-5p	10.7699	**
hsa-miR-452-5p	13.1746	**	hsa-miR-361-5p	1.16044	**	hsa-miR-4647	-2.38371	**
hsa-miR-455-5p	1.14126	**	hsa-miR-362-5p	2.33542	**	hsa-miR-4687-3p	3.70375	**
hsa-miR-4637	6.95513	**	hsa-miR-363-3p	8.12006	**	hsa-miR-4728-5p	-1.99642	**
hsa-miR-4647	-1.58451	**	hsa-miR-363-5p	9.61499	**	hsa-miR-4775	-1.57617	*
hsa-miR-4659a-3p	2.60988	**	hsa-miR-365a-3p	2.2005	**	hsa-miR-483-5p	6.33315	**
hsa-miR-4688	2.46543	**	hsa-miR-365a-5p	2.11169	**	hsa-miR-484	-1.32722	**
hsa-miR-4706	6.95513	**	hsa-miR-365b-3p	2.2005	**	hsa-miR-485-3p	10.6998	**
hsa-miR-4728-5p	-1.57624	*	hsa-miR-365b-5p	7.12741	**	hsa-miR-485-5p	6.11884	**
hsa-miR-4741	7.62256	**	hsa-miR-3660	7.3779	**	hsa-miR-487b	4.70378	**
hsa-miR-4745-5p	5.2943	**	hsa-miR-3676-3p	4.68857	**	hsa-miR-493-3p	7.22843	**
hsa-miR-4763-3p	2.7093	**	hsa-miR-3691-5p	1.72776	*	hsa-miR-493-5p	5.43171	**
hsa-miR-4775	-2.69983	**	hsa-miR-369-3p	12.8264	**	hsa-miR-494	7.18762	**
hsa-miR-486-3p	4.33852	**	hsa-miR-369-5p	11.0409	**	hsa-miR-495-3p	5.24812	**
hsa-miR-486-5p	3.2768	**	hsa-miR-370	7.3779	**	hsa-miR-497-5p	1.17771	**
hsa-miR-500a-3p	3.06925	**	hsa-miR-374a-3p	1.91257	**	hsa-miR-500a-3p	1.61066	**
hsa-miR-5010-5p	1.26189	**	hsa-miR-374a-5p	1.7179	**	hsa-miR-5010-5p	2.51971	**
hsa-miR-502-3p	3.05039	**	hsa-miR-374b-3p	2.69297	**	hsa-miR-502-3p	1.7038	**
hsa-miR-503-5p	2.47053	**	hsa-miR-374b-5p	2.31873	**	hsa-miR-503-5p	3.20303	**
hsa-miR-505-5p	2.39851	**	hsa-miR-375	3.5203	**	hsa-miR-5187-5p	-1.59872	**
hsa-miR-5090	2.12433	*	hsa-miR-376a-3p	10.5248	**	hsa-miR-532-5p	-1.65236	**
hsa-miR-5189	2.80242	**	hsa-miR-376b-3p	10.4855	**	hsa-miR-539-3p	4.74817	**
hsa-miR-532-3p	2.2619	**	hsa-miR-376c-3p	8.15162	**	hsa-miR-542-3p	1.35585	*
hsa-miR-532-5p	2.57395	**	hsa-miR-377-3p	10.2894	**	hsa-miR-543	6.46756	**
hsa-miR-544b	-6.65019	**	hsa-miR-377-5p	8.30757	**	hsa-miR-544b	-6.65019	**
hsa-miR-548e	2.20846	**	hsa-miR-378a-3p	2.44476	**	hsa-miR-548a-3p	1.32829	**
hsa-miR-548j	1.0395	**	hsa-miR-378c	1.78546	**	hsa-miR-548l	1.04486	*
hsa-miR-548k	1.40285	**	hsa-miR-378d	2.58333	**	hsa-miR-548n	1.73945	**
hsa-miR-548l	1.75355	**	hsa-miR-379-3p	8.03	**	hsa-miR-548t-5p	3.07303	**
hsa-miR-548n	1.8381	**	hsa-miR-379-5p	8.24532	**	hsa-miR-548v	3.09616	**
hsa-miR-548t-5p	4.19477	**	hsa-miR-382-3p	8.65058	**	hsa-miR-550a-3p	2.3559	**
hsa-miR-548u	1.80247	**	hsa-miR-382-5p	9.96274	**	hsa-miR-573	7.2926	**
hsa-miR-550a-3p	1.94932	**	hsa-miR-383	9.19508	**	hsa-miR-574-5p	1.51116	**
hsa-miR-551a	5.4749	**	hsa-miR-3908	6.68608	**	hsa-miR-582-3p	2.51117	**
hsa-miR-574-3p	1.77028	**	hsa-miR-3928	2.63311	**	hsa-miR-582-5p	2.53386	**
hsa-miR-574-5p	3.32602	**	hsa-miR-3935	-4.53916	**	hsa-miR-584-5p	-4.0434	**
hsa-miR-576-3p	1.53944	**	hsa-miR-409-3p	10.1102	**	hsa-miR-585	7.57637	**
hsa-miR-582-3p	3.63029	**	hsa-miR-409-5p	10.9045	**	hsa-miR-589-5p	1.90543	**
hsa-miR-582-5p	3.45271	**	hsa-miR-410	5.51285	**	hsa-miR-598	-12.3155	**
hsa-miR-589-3p	1.26192	**	hsa-miR-411-3p	10.7338	**	hsa-miR-6087	10.1545	**
hsa-miR-589-5p	1.88653	**	hsa-miR-411-5p	12.4573	**	hsa-miR-625-5p	1.2888	*
hsa-miR-590-5p	1.46987	**	hsa-miR-421	2.36016	**	hsa-miR-628-3p	1.56887	**
hsa-miR-598	-9.44763	**	hsa-miR-423-3p	2.33543	**	hsa-miR-628-5p	2.40425	**
hsa-miR-6087	7.40609	**	hsa-miR-423-5p	2.78445	**	hsa-miR-641	1.70379	**
hsa-miR-615-3p	2.80242	**	hsa-miR-425-3p	1.99694	**	hsa-miR-642a-3p	2.31525	**
hsa-miR-615-5p	3.23785	**	hsa-miR-425-5p	1.97102	**	hsa-miR-651	-4.38292	**
hsa-miR-625-3p	1.45452	**	hsa-miR-4286	2.42941	**	hsa-miR-652-3p	1.0823	*
hsa-miR-625-5p	1.58003	**	hsa-miR-431-3p	8.84361	**	hsa-miR-655	6.85649	**
hsa-miR-628-3p	2.4045	**	hsa-miR-431-5p	9.47747	**	hsa-miR-663a	7.89833	**
hsa-miR-628-5p	2.93173	**	hsa-miR-432-5p	18.0336	**	hsa-miR-664a-3p	-1.03313	*
hsa-miR-629-3p	2.60988	**	hsa-miR-433	13.4327	**	hsa-miR-675-3p	-8.42278	**
hsa-miR-629-5p	1.81741	**	hsa-miR-4425	5.00784	**	hsa-miR-675-5p	-7.23647	**
hsa-miR-641	1.41252	**	hsa-miR-4458	1.72776	*	hsa-miR-708-5p	6.67596	**
hsa-miR-642a-3p	3.95446	**	hsa-miR-4467	5.67528	**	hsa-miR-744-5p	1.28727	**
hsa-miR-6511a-5p	3.50291	**	hsa-miR-4485	-2.40166	**	hsa-miR-7-5p	1.0333	**
hsa-miR-6511b-5p	3.53944	**	hsa-miR-449a	3.02893	**	hsa-miR-769-3p	1.90544	**
hsa-miR-652-3p	1.53944	**	hsa-miR-449b-5p	5.6753	**	hsa-miR-889	5.41804	**
hsa-miR-652-5p	7.26003	**	hsa-miR-449c-5p	4.48518	**	hsa-miR-92a-1-5p	1.63796	**
hsa-miR-660-3p	6.77452	**	hsa-miR-4521	3.78334	**	hsa-miR-92b-3p	1.26344	**
hsa-miR-660-5p	2.07809	**	hsa-miR-452-5p	7.85703	**	hsa-miR-92b-5p	2.40758	**
hsa-miR-664a-5p	1.52173	**	hsa-miR-455-3p	-1.10426	**	hsa-miR-934	-8.31316	**
hsa-miR-664b-5p	2.98689	**	hsa-miR-455-5p	-1.58208	**	hsa-miR-935	7.6638	**
hsa-miR-671-5p	2.46543	**	hsa-miR-4647	-1.70759	**	hsa-miR-936	-7.65019	**
hsa-miR-6720-3p	2.38742	**	hsa-miR-4687-3p	4.1683	**	hsa-miR-9-3p	6.71503	**
hsa-miR-675-3p	-1.16275	**	hsa-miR-4689	6.68608	**	hsa-miR-940	1.45382	**
hsa-miR-744-5p	1.4668	**	hsa-miR-4707-3p	2.72776	**	hsa-miR-941	1.50676	**
hsa-miR-7-5p	2.41252	**	hsa-miR-4741	8.57058	**	hsa-miR-942	2.11885	**
hsa-miR-760	2.79318	**	hsa-miR-4743-5p	2.62085	**	hsa-miR-944	-3.49683	**
hsa-miR-766-3p	1.44629	**	hsa-miR-4749-5p	2.56427	**	hsa-miR-95	-2.13271	**
hsa-miR-766-5p	3.03798	**	hsa-miR-4750-5p	3.37984	**	hsa-miR-9-5p	10.3911	**
hsa-miR-767-5p	10.5115	**	hsa-miR-4775	-1.35984	*	hsa-miR-96-5p	-1.10611	**
hsa-miR-873-3p	8.84496	**	hsa-miR-4785	2.1428	*	hsa-miR-98-5p	-1.52926	**
hsa-miR-873-5p	6.99228	**	hsa-miR-4787-3p	3.12985	**	hsa-miR-99a-5p	3.38563	**
hsa-miR-874	1.91794	**	hsa-miR-483-5p	10.0052	**	Novel miRNA
hsa-miR-876-5p	8.0376	**	hsa-miR-485-3p	15.4461	**	novel_mir_10	-7.65019	**
hsa-miR-877-5p	1.41853	**	hsa-miR-485-5p	10.1915	**	novel_mir_123	7.09096	**
hsa-miR-92a-1-5p	1.92787	**	hsa-miR-486-3p	1.84637	**	novel_mir_138	9.52391	**
hsa-miR-92a-3p	1.42371	**	hsa-miR-487a	9.52478	**	novel_mir_18	-7.06523	**
hsa-miR-92b-3p	3.50435	**	hsa-miR-487b	8.3319	**	novel_mir_237	7.41287	**
hsa-miR-92b-5p	4.89352	**	hsa-miR-493-3p	10.6295	**	novel_mir_242	7.57637	**
hsa-miR-934	-8.31316	**	hsa-miR-493-5p	9.39815	**	novel_mir_247	8.05441	**
hsa-miR-935	7.90049	**	hsa-miR-494	10.3581	**	novel_mir_25	16.5692	**
hsa-miR-936	-7.65019	**	hsa-miR-495-3p	9.92555	**	novel_mir_26	-9.35063	**
hsa-miR-941	3.88631	**	hsa-miR-496	7.50536	**	novel_mir_28	1.7038	*
hsa-miR-942	3.19477	**	hsa-miR-497-5p	2.76169	**	novel_mir_30	6.67596	**
hsa-miR-944	-3.59748	**	hsa-miR-499a-5p	1.94706	**	novel_mir_34	-8.06523	**
hsa-miR-95	1.67431	**	hsa-miR-5001-5p	3.82728	**	novel_mir_41	-6.97212	**
hsa-miR-99a-3p	8.79844	**	hsa-miR-500a-3p	1.44399	*	novel_mir_46	-7.15269	**
hsa-miR-99a-5p	6.48038	**	hsa-miR-5010-5p	4.43609	**	novel_mir_49	-15.834	**
Novel miRNA			hsa-miR-502-3p	1.40583	**	novel_mir_6	11.0026	**
novel_mir_10	-7.65019	**	hsa-miR-5090	3.50534	**	novel_mir_7	-7.70908	**
novel_mir_100	8.45265	**	hsa-miR-532-3p	1.859	**	novel_mir_86	6.85649	**
novel_mir_101	7.0376	**	hsa-miR-532-5p	2.84521	**	novel_mir_9	1.92618	**
novel_mir_104	6.67511	**	hsa-miR-539-3p	8.42422	**	novel_mir_96	10.6517	**
novel_mir_107	9.22523	**	hsa-miR-539-5p	7.6295	**
novel_mir_112	7.39129	**	hsa-miR-541-5p	9.52478	**
novel_mir_115	7.0376	**	hsa-miR-543	11.0932	**
novel_mir_122	7.62256	**	hsa-miR-544b	-6.65019	**
novel_mir_123	8.67504	**	hsa-miR-548a-3p	1.92039	**
novel_mir_128	8.11562	**	hsa-miR-548ay-5p	1.82728	*
novel_mir_129	6.77452	**	hsa-miR-548d-5p	1.62085	*
novel_mir_130	6.67511	**	hsa-miR-548e	-1.00925	**
novel_mir_131	6.67511	**	hsa-miR-548l	2.22296	**
novel_mir_14	1.96166	**	hsa-miR-548t-5p	2.50534	**
novel_mir_17	2.1244	**	hsa-miR-551b-3p	4.96478	**
novel_mir_18	1.2943	**	hsa-miR-551b-5p	2.20049	**
novel_mir_20	1.94381	**	hsa-miR-574-3p	1.02276	**
novel_mir_26	-9.35063	**	hsa-miR-574-5p	2.44965	**
novel_mir_28	2.43475	**	hsa-miR-576-3p	1.27407	*
novel_mir_29	-7.31316	**	hsa-miR-584-5p	-1.77621	**
novel_mir_30	9.35955	**	hsa-miR-598	2.5871	**
novel_mir_41	-6.97212	**	hsa-miR-615-5p	2.52705	**
novel_mir_46	-7.15269	**	hsa-miR-624-5p	2.24232	**
novel_mir_55	6.67511	**	hsa-miR-625-3p	2.36097	**
novel_mir_61	8.84496	**	hsa-miR-625-5p	2.6366	**
novel_mir_63	6.67511	**	hsa-miR-628-3p	1.99568	**
novel_mir_69	7.72567	**	hsa-miR-628-5p	1.92039	*
novel_mir_7	-1.38194	**	hsa-miR-641	2.83233	**
novel_mir_71	6.95513	**	hsa-miR-642a-3p	2.17674	**
novel_mir_78	8.22526	**	hsa-miR-6511a-5p	3.50534	**
novel_mir_8	7.72567	**	hsa-miR-6511b-5p	3.62085	**
novel_mir_83	6.95513	**	hsa-miR-6514-5p	1.63664	**
novel_mir_93	7.45261	**	hsa-miR-654-3p	10.1951	**
novel_mir_96	7.39129	**	hsa-miR-654-5p	9.47747	**
novel_mir_98	7.11562	**	hsa-miR-655	10.8248	**
			hsa-miR-656	8.37795	**
			hsa-miR-660-5p	1.71685	**
			hsa-miR-665	7.15553	**
			hsa-miR-668	9.00798	**
			hsa-miR-6721-5p	2.69091	**
			hsa-miR-675-3p	-8.42278	**
			hsa-miR-675-5p	-12.3273	**
			hsa-miR-7-1-3p	-1.2089	**
			hsa-miR-744-5p	1.43918	**
			hsa-miR-758-5p	8.68605	**
			hsa-miR-760	1.58336	**
			hsa-miR-765	1.52704	**
			hsa-miR-766-3p	1.72776	**
			hsa-miR-766-5p	2.48281	**
			hsa-miR-767-5p	10.1354	**
			hsa-miR-769-3p	2.35337	**
			hsa-miR-769-5p	2.33542	**
			hsa-miR-873-5p	2.92039	**
			hsa-miR-874	2.55783	**
			hsa-miR-877-5p	2.15207	**
			hsa-miR-885-3p	1.92039	**
			hsa-miR-887	8.07307	**
			hsa-miR-889	8.67486	**
			hsa-miR-92a-1-5p	1.33753	**
			hsa-miR-92a-2-5p	8.44506	**
			hsa-miR-92a-3p	1.23919	**
			hsa-miR-92b-3p	3.02068	**
			hsa-miR-92b-5p	4.38932	**
			hsa-miR-934	-8.31316	**
			hsa-miR-935	10.6338	**
			hsa-miR-936	-7.65019	**
			hsa-miR-9-3p	10.4518	**
			hsa-miR-940	3.07566	**
			hsa-miR-941	2.59942	**
			hsa-miR-942	2.62085	**
			hsa-miR-944	-7.23455	**
			hsa-miR-9-5p	14.6322	**
			hsa-miR-98-5p	-1.13944	**
			hsa-miR-99b-3p	1.27923	**
			Novel miRNA
			novel_mir_10	-7.65019	**
			novel_mir_14	2.65737	**
			novel_mir_15	1.85903	**
			novel_mir_17	1.42288	*
			novel_mir_177	6.68608	**
			novel_mir_18	-7.06523	**
			novel_mir_181	6.68608	**
			novel_mir_184	9.23355	**
			novel_mir_187	7.23352	**
			novel_mir_188	7.23352	**
			novel_mir_20	1.85529	**
			novel_mir_200	8.27104	**
			novel_mir_205	7.57061	**
			novel_mir_213	7.23352	**
			novel_mir_218	7.23352	**
			novel_mir_25	18.2464	**
			novel_mir_26	-9.35063	**
			novel_mir_28	1.50536	*
			novel_mir_30	8.68605	**
			novel_mir_34	-8.06523	**
			novel_mir_41	-6.97212	**
			novel_mir_42	2.68591	**
			novel_mir_46	-7.15269	**
			novel_mir_49	-15.834	**
			novel_mir_5	-1.58442	**
			novel_mir_57	6.89251	**
			novel_mir_6	14.7046	**
			novel_mir_7	-1.13847	*
			novel_mir_87	6.68608	**
