# Supplementary material for: MicroRNA-944 Affects Cell Growth by Targeting EPHA7 in Non-Small Cell Lung Cancer
Source: Int J Mol Sci. 2016 Sep 26;17(10):1493. doi: 10.3390/ijms17101493 (PMC5085614; doi:10.3390/ijms17101493)
Supplement: Supplementary file 1 [file ijms-17-01493-s001.zip › Additional file 2.xls]

## Sheet: 工作表1
Additional file 2. The differently expressed genes after miR-944 overexpression in EPLC-32M1 cells compared with control cells using microarray analysis.
Red: upregulated, Fold change>=2; Green: downregulated, Fold change<=0.5 ; A: EPLC-32M1 with miR-944 mimic; B: EPLC-32M1 cells with negative control (NC)
ProbeName	Fold change ([A] vs [B])	PrimaryAccession	GenbankAccession	GeneSymbol	Description	Cytoband
A_24_P54390	2.06383	NM_170672	NM_170672	RASGRP3	"Homo sapiens RAS guanyl releasing protein 3 (calcium and DAG-regulated) (RASGRP3), transcript variant 2, mRNA [NM_170672]"	hs|2p22.3
A_21_P0007864	2.45663	AK125770	AK125770	XLOC_009948	"Q2MEL3_9HIV1 (Q2MEL3) Envelope glycoprotein gp120 (Fragment), partial (7%) [THC2629010]"	hs|12q24.32
A_21_P0010488	2.21663	ENST00000381215	BC020877	ZNF605	"BROAD Institute lincRNA (XLOC_014510), lincRNA [TCONS_00030028]"	hs|12q24.33
A_23_P205074	3.55951	NM_181785	NM_181785	SLC46A3	"Homo sapiens solute carrier family 46, member 3 (SLC46A3), transcript variant 1, mRNA [NM_181785]"	hs|13q12.3
A_32_P84369	2.12688	NM_001079529	NM_001079529	FAM153B	"Homo sapiens family with sequence similarity 153, member B (FAM153B), mRNA [NM_001079529]"	hs|5q35.2
A_21_P0008564	2.65283	BC044934	BC044934	XLOC_011554	"Q65ED5_BACLD (Q65ED5) YvjD (PDZ/DHR/GLGF domain), partial (5%) [THC2495891]"	hs|15q25.2
A_23_P134566	3.00921	NM_001005328	NM_001005328	OR2A7	"Homo sapiens olfactory receptor, family 2, subfamily A, member 7 (OR2A7), mRNA [NM_001005328]"	hs|7q35
A_24_P298027	2.00909	NM_004655	NM_004655	AXIN2	"Homo sapiens axin 2 (AXIN2), mRNA [NM_004655]"	hs|17q24.1
A_33_P3379492	2.0542	AK092544	AK092544	LOC100131581	"Homo sapiens cDNA FLJ35225 fis, clone PROST2001116. [AK092544]"	hs|8p23.1
A_24_P258846	2.1982	NM_172390	NM_172390	NFATC1	"Homo sapiens nuclear factor of activated T-cells, cytoplasmic, calcineurin-dependent 1 (NFATC1), transcript variant 1, mRNA [NM_172390]"	hs|18q23
A_33_P3255220	2.17178	DA797466	DA797466		"DA797466 OCBBF3 Homo sapiens cDNA clone OCBBF3000584 5', mRNA sequence [DA797466]"	hs|15q25.2
A_23_P64372	2.3845	NM_001062	NM_001062	TCN1	"Homo sapiens transcobalamin I (vitamin B12 binding protein, R binder family) (TCN1), mRNA [NM_001062]"	hs|11q12.1
A_33_P3789069	2.5972	NR_034132	NR_034132	LOC400084	"Homo sapiens uncharacterized LOC400084 (LOC400084), non-coding RNA [NR_034132]"	hs|12q24.32
A_24_P940059	3.14223	NM_015553	NM_015553	IPCEF1	"Homo sapiens interaction protein for cytohesin exchange factors 1 (IPCEF1), transcript variant 3, mRNA [NM_015553]"	hs|6q25.2
A_23_P394043	2.17091	NM_001080429	NM_001080429	CAMSAP3	"Homo sapiens calmodulin regulated spectrin-associated protein family, member 3 (CAMSAP3), transcript variant 1, mRNA [NM_001080429]"	hs|19p13.2
A_33_P3345623	2.38518	NM_001003700	NM_001003700	RREB1	"Homo sapiens ras responsive element binding protein 1 (RREB1), transcript variant 4, mRNA [NM_001003700]"	hs|6p24.3
A_24_P21985	2.07115	NM_018416	NM_018416	FOXJ2	"Homo sapiens forkhead box J2 (FOXJ2), mRNA [NM_018416]"	hs|12p13.31
A_32_P424761	4.16572	ENST00000299350	XM_001716650	C12orf28	chromosome 12 open reading frame 28 [Source:HGNC Symbol;Acc:26316] [ENST00000299350]	hs|12q15
A_23_P9293	2.15783	NM_004817	NM_004817	TJP2	"Homo sapiens tight junction protein 2 (zona occludens 2) (TJP2), transcript variant 1, mRNA [NM_004817]"	hs|9q21.11
A_33_P3269803	2.1687	NM_014718	NM_014718	CLSTN3	"Homo sapiens calsyntenin 3 (CLSTN3), mRNA [NM_014718]"	hs|12p13.31
A_24_P190541	2.63911	NM_018963	NM_018963	BRWD1	"Homo sapiens bromodomain and WD repeat domain containing 1 (BRWD1), transcript variant 1, mRNA [NM_018963]"	hs|21q22.2
A_23_P119916	4.72388	NM_006522	NM_006522	WNT6	"Homo sapiens wingless-type MMTV integration site family, member 6 (WNT6), mRNA [NM_006522]"	hs|2q35
A_21_P0000464	6.96608	NR_003689	NR_003689	SNORD123	"Homo sapiens small nucleolar RNA, C/D box 123 (SNORD123), small nucleolar RNA [NR_003689]"	hs|5p15.31
A_23_P338534	2.55763	NM_022462	NM_022462	HIF3A	"Homo sapiens hypoxia inducible factor 3, alpha subunit (HIF3A), transcript variant 2, mRNA [NM_022462]"	hs|19q13.32
A_23_P387585	7.38681	NR_026595	NR_026595	LINC00246A	"Homo sapiens long intergenic non-protein coding RNA 246A (LINC00246A), non-coding RNA [NR_026595]"	hs|Xq13.2
A_19_P00322224	2.06275	NR_024389	NR_024389	FLJ16779	"Homo sapiens uncharacterized LOC100192386 (FLJ16779), non-coding RNA [NR_024389]"	hs|20q13.33
A_33_P3279515	2.83035	AK096898	AK096898	LOC729451	"Homo sapiens cDNA FLJ39579 fis, clone SKMUS2003168. [AK096898]"	hs|14q22.2
A_21_P0003857	2.62658	TCONS_00008928		XLOC_003772	"BROAD Institute lincRNA (XLOC_003772), lincRNA [TCONS_00008928]"	hs|4q33
A_33_P3210653	4.63837	NM_001005329	NM_001005329	OR51A4	"Homo sapiens olfactory receptor, family 51, subfamily A, member 4 (OR51A4), mRNA [NM_001005329]"	hs|11p15.4
A_33_P3391736	7.45451	ENST00000509911	BM918748		"AGENCOURT_6635167 NIH_MGC_120 Homo sapiens cDNA clone IMAGE:5747798 5', mRNA sequence [BM918748]"	hs|9p13.2
A_24_P59053	4.6678	ENST00000390387	X58814		T cell receptor beta variable 3-1 [Source:HGNC Symbol;Acc:12212] [ENST00000390387]	hs|7q34
A_19_P00322059	4.94541	NM_001142857	NM_001142857	EFCAB1	"Homo sapiens EF-hand calcium binding domain 1 (EFCAB1), transcript variant 2, mRNA [NM_001142857]"	hs|8q11.21
A_23_P93727	2.45938	NM_152744	NM_152744	SDK1	"Homo sapiens sidekick homolog 1, cell adhesion molecule (chicken) (SDK1), transcript variant 1, mRNA [NM_152744]"	hs|7p22.2
A_24_P227141	3.82827	NM_198381	NM_198381	ELF5	"Homo sapiens E74-like factor 5 (ets domain transcription factor) (ELF5), transcript variant 1, mRNA [NM_198381]"	hs|11p13
A_33_P3284711	2.41439	NR_024348	NR_024348	FBXL19-AS1	"Homo sapiens FBXL19 antisense RNA 1 (non-protein coding) (FBXL19-AS1), non-coding RNA [NR_024348]"	hs|16p11.2
A_21_P0011946	2.1643	TCONS_l2_00014779		XLOC_l2_008200	"BROAD Institute lincRNA (XLOC_l2_008200), lincRNA [TCONS_l2_00014779]"	hs|2q13
A_33_P3241135	6.63056	NM_000845	NM_000845	GRM8	"Homo sapiens glutamate receptor, metabotropic 8 (GRM8), transcript variant 1, mRNA [NM_000845]"	hs|7q31.33
A_33_P3411097	2.56902	NM_001145118	NM_001145118	GRID2IP	"Homo sapiens glutamate receptor, ionotropic, delta 2 (Grid2) interacting protein (GRID2IP), mRNA [NM_001145118]"	hs|7p22.1
A_23_P254741	3.8588	NM_003102	NM_003102	SOD3	"Homo sapiens superoxide dismutase 3, extracellular (SOD3), mRNA [NM_003102]"	hs|4p15.2
A_33_P3380196	5.03055	BC015533	BC015533	AKAP9	"Homo sapiens A kinase (PRKA) anchor protein (yotiao) 9, mRNA (cDNA clone IMAGE:3914749), complete cds. [BC015533]"	hs|7q21.2
A_21_P0006710	2.52899	ENST00000411599	AL039002	XLOC_008642	"DKFZp566C124_r1 566 (synonym: hfkd2) Homo sapiens cDNA clone DKFZp566C124 5', mRNA sequence [AL039002]"	hs|10q26.12
A_23_P23873	9.62976	NM_020318	NM_020318	PAPPA2	"Homo sapiens pappalysin 2 (PAPPA2), transcript variant 1, mRNA [NM_020318]"	hs|1q25.2
A_21_P0014165	2.40354	XR_108671	XR_108671	LOC100506379	"PREDICTED: Homo sapiens hypothetical LOC100506379, transcript variant 1 (LOC100506379), miscRNA [XR_108671]"	hs|6p24.2
A_21_P0000050	2.34674	NM_001164549	NM_001164549	DISC1	"Homo sapiens disrupted in schizophrenia 1 (DISC1), transcript variant l, mRNA [NM_001164549]"	hs|1q42.2
A_21_P0013204	9.3246	TCONS_l2_00025910		XLOC_l2_013427	"BROAD Institute lincRNA (XLOC_l2_013427), lincRNA [TCONS_l2_00025910]"	hs|7q11.21
A_23_P410600	2.33883	NM_033261	NM_033261	IDI2	"Homo sapiens isopentenyl-diphosphate delta isomerase 2 (IDI2), mRNA [NM_033261]"	hs|10p15.3
A_23_P257834	5.33296	NM_000477	NM_000477	ALB	"Homo sapiens albumin (ALB), mRNA [NM_000477]"	hs|4q13.3
A_33_P3423420	12.5551	NM_024702	NM_024702	ZNF750	"Homo sapiens zinc finger protein 750 (ZNF750), mRNA [NM_024702]"	hs|17q25.3
A_21_P0008433	2.28299	TCONS_00022738		XLOC_011014	"BROAD Institute lincRNA (XLOC_011014), lincRNA [TCONS_00022738]"	hs|14q21.3
A_21_P0002174	6.64647	TCONS_00003582		XLOC_001357	"BROAD Institute lincRNA (XLOC_001357), lincRNA [TCONS_00003582]"	hs|2p24.3
A_21_P0001932	13.0552	ENST00000432251	BX119135	XLOC_001731	"BX119135 Soares_total_fetus_Nb2HF8_9w Homo sapiens cDNA clone IMAGp998G211945, mRNA sequence [BX119135]"	hs|2q24.2
A_33_P3408137	7.67976	AK124216	AK124216	LOC100130248	"Homo sapiens cDNA FLJ42222 fis, clone THYMU2039411. [AK124216]"	hs|2q14.3
A_21_P0006109	8.87738	ENST00000425370		XLOC_007855	"BROAD Institute lincRNA (XLOC_007855), lincRNA [TCONS_00015884]"	hs|9q33.3
A_19_P00319825	2.68242	NR_026949	NR_026949	LINC00277	"Homo sapiens long intergenic non-protein coding RNA 277 (LINC00277), non-coding RNA [NR_026949]"	hs|15q23
A_21_P0003991	5.57351	ENST00000514586	DA739151	XLOC_004346	"DA739151 NT2RP7 Homo sapiens cDNA clone NT2RP7000476 5', mRNA sequence [DA739151]"	hs|5p13.1
A_21_P0004639	6.51016	ENST00000414502	BX280888	XLOC_005228		hs|6p22.1
A_21_P0002599	11.0576	THC2742479		XLOC_001544	"Q4SYT1_TETNG (Q4SYT1) Chromosome undetermined SCAF11962, whole genome shotgun sequence. (Fragment), partial (9%) [THC2742479]"	hs|2p12
A_21_P0014757	7.09481	XR_132507	XR_132507	LOC100506766	"PREDICTED: Homo sapiens hypothetical LOC100506766 (LOC100506766), miscRNA [XR_132507]"	hs|5p15.33
A_21_P0000708	4.53097	NR_037933	NR_037933	C14orf55	"Homo sapiens chromosome 14 open reading frame 55 (C14orf55), non-coding RNA [NR_037933]"	hs|14q24.2
A_23_P216434	6.9829	ENST00000375540	BC036806	ECM2	"extracellular matrix protein 2, female organ and adipocyte specific [Source:HGNC Symbol;Acc:3154] [ENST00000375540]"	hs|9q22.31
A_19_P00318375	2.25251	NR_026817	NR_026817	LOC148696	"Homo sapiens uncharacterized LOC148696 (LOC148696), non-coding RNA [NR_026817]"	hs|1q32.2
A_21_P0013689	2.96726	ENST00000423112	BX118352	XLOC_l2_014694	"BX118352 Soares_testis_NHT Homo sapiens cDNA clone IMAGp998L221795, mRNA sequence [BX118352]"	hs|9p24.2
A_23_P385105	2.15552	NM_032726	NM_032726	PLCD4	"Homo sapiens phospholipase C, delta 4 (PLCD4), mRNA [NM_032726]"	hs|2q35
A_33_P3373308	5.6569	NR_036683	NR_036683	LOC440700	"Homo sapiens carbonic anhydrase XIV (CA14) pseudogene (LOC440700), non-coding RNA [NR_036683]"	hs|1q24.1
A_24_P51375	2.67256	AF351612	AF351612		"Homo sapiens UG0651E06 mRNA, complete cds. [AF351612]"	hs|6q25.3
A_23_P324419	4.57007	NM_152614	NM_152614	C2orf57	"Homo sapiens chromosome 2 open reading frame 57 (C2orf57), mRNA [NM_152614]"	hs|2q37.1
A_21_P0002116	3.50829	ENST00000421624	DA017974	XLOC_002356	"DA017974 ADRGL2 Homo sapiens cDNA clone ADRGL2012306 5', mRNA sequence [DA017974]"	hs|2q23.3
A_23_P18993	4.0154	NM_152622	NM_152622	MIER3	"Homo sapiens mesoderm induction early response 1, family member 3 (MIER3), mRNA [NM_152622]"	hs|5q11.2
A_24_P340227	10.2528	NR_001540	NR_001540	TTTY23	"Homo sapiens testis-specific transcript, Y-linked 23 (non-protein coding) (TTTY23), non-coding RNA [NR_001540]"	hs|Yp11.2
A_21_P0010165	3.65633	AK024918	AK024918	XLOC_013958	"ALU5_HUMAN (P39192) Alu subfamily SC sequence contamination warning entry, partial (27%) [THC2590933]"	hs|21q22.3
A_21_P0005241	18.6919	ENST00000431722		XLOC_006154	"BROAD Institute lincRNA (XLOC_006154), lincRNA [TCONS_00013024]"	hs|7q21.11
A_33_P3409665	2.70412	NM_001007188	NM_001007188	DEPDC5	"Homo sapiens DEP domain containing 5 (DEPDC5), transcript variant 2, mRNA [NM_001007188]"	hs|22q12.3
A_21_P0010763	3.39045	ENST00000452834	BC037222	XLOC_l2_000969	"2124399A transposase-like protein. {Homo sapiens} (exp=-1; wgp=0; cg=0), partial (80%) [THC2607169]"	hs|1p31.1
A_21_P0014919	5.41536	NR_024560	NR_024560	LOC100130148	"Homo sapiens uncharacterized LOC100130148 (LOC100130148), non-coding RNA [NR_024560]"	hs|17q21.31
A_21_P0008347	11.7443	TCONS_00022531		XLOC_010855	"BROAD Institute lincRNA (XLOC_010855), lincRNA [TCONS_00022531]"	hs|14q23.3
A_23_P371254	2.47921	NM_176884	NM_176884	TAS2R43	"Homo sapiens taste receptor, type 2, member 43 (TAS2R43), mRNA [NM_176884]"	hs|12p13.2
A_32_P183367	2.29268	NM_020180	NM_020180	CELF4	"Homo sapiens CUGBP, Elav-like family member 4 (CELF4), transcript variant 1, mRNA [NM_020180]"	hs|18q12.2
A_23_P69089	10.6383	AK021889	AK021889		"Homo sapiens cDNA FLJ11827 fis, clone HEMBA1006502. [AK021889]"	hs|3q23
A_19_P00323692	7.61648	NR_001564	NR_001564	XIST	"Homo sapiens X (inactive)-specific transcript (non-protein coding) (XIST), non-coding RNA [NR_001564]"	hs|Xq13.2
A_21_P0000118	2.05592	NM_001193283	NM_001193283	LEKR1	"Homo sapiens leucine, glutamate and lysine rich 1 (LEKR1), transcript variant 2, mRNA [NM_001193283]"	hs|3q25.31
A_24_P299769	4.9326	NM_012353	NM_012353	OR1C1	"Homo sapiens olfactory receptor, family 1, subfamily C, member 1 (OR1C1), mRNA [NM_012353]"	hs|1q44
A_33_P3260680	2.8541	NM_001004696	NM_001004696	OR2T4	"Homo sapiens olfactory receptor, family 2, subfamily T, member 4 (OR2T4), mRNA [NM_001004696]"	hs|1q44
A_24_P334456	2.36491	NM_197941	NM_197941	ADAMTS6	"Homo sapiens ADAM metallopeptidase with thrombospondin type 1 motif, 6 (ADAMTS6), mRNA [NM_197941]"	hs|5q12.3
A_33_P3219527	3.10244	ENST00000395265	AK096671	RTKN2	rhotekin 2 [Source:HGNC Symbol;Acc:19364] [ENST00000395265]	hs|10q21.2
A_23_P165783	5.09007	NM_024101	NM_024101	MLPH	"Homo sapiens melanophilin (MLPH), transcript variant 1, mRNA [NM_024101]"	hs|2q37.3
A_33_P3257474	2.24439	NM_001042367	NM_001042367	C15orf60	"Homo sapiens chromosome 15 open reading frame 60 (C15orf60), mRNA [NM_001042367]"	hs|15q24.1
A_33_P3360087	3.4804	NM_014451	NM_014451	BBS9	"Homo sapiens Bardet-Biedl syndrome 9 (BBS9), transcript variant 1, mRNA [NM_014451]"	hs|7p14.3
A_23_P403991	4.18761	NM_024080	NM_024080	TRPM8	"Homo sapiens transient receptor potential cation channel, subfamily M, member 8 (TRPM8), mRNA [NM_024080]"	hs|2q37.1
A_24_P136866	8.75436	NM_021097	NM_021097	SLC8A1	"Homo sapiens solute carrier family 8 (sodium/calcium exchanger), member 1 (SLC8A1), transcript variant A, mRNA [NM_021097]"	hs|2p22.1
A_33_P3266998	2.00854	NR_026810	NR_026810	FAM106CP	"Homo sapiens family with sequence similarity 106, member C, pseudogene (FAM106CP), non-coding RNA [NR_026810]"	hs|17p11.2
A_23_P257803	2.26959	NM_013391	NM_013391	DMGDH	"Homo sapiens dimethylglycine dehydrogenase (DMGDH), nuclear gene encoding mitochondrial protein, mRNA [NM_013391]"	hs|5q14.1
A_21_P0014537	2.19492	XR_110234	XR_110234	LOC100506792	"PREDICTED: Homo sapiens hypothetical LOC100506792, transcript variant 2 (LOC100506792), miscRNA [XR_110234]"	hs|14q32.11
A_33_P3286980	4.75827	NM_001105662	NM_001105662	USP17	"Homo sapiens ubiquitin specific peptidase 17 (USP17), mRNA [NM_001105662]"	hs|4p16.1
A_21_P0012538	4.41428	AW269794	AW269794	XLOC_l2_010161	"xv45d05.x1 Soares_NFL_T_GBC_S1 Homo sapiens cDNA clone IMAGE:2816073 3', mRNA sequence [AW269794]"	hs|3p22.1
A_21_P0008793	2.73457	BX119465	BX119465	XLOC_011596	"BX119465 Soares_NFL_T_GBC_S1 Homo sapiens cDNA clone IMAGp998P193909 ; IMAGE:1543554, mRNA sequence [BX119465]"	hs|15q26.2
A_33_P3242663	2.50637	NM_024749	NM_024749	VASH2	"Homo sapiens vasohibin 2 (VASH2), transcript variant 1, mRNA [NM_024749]"	hs|1q32.3
A_21_P0014614	2.16503	XR_110550	XR_110550	LOC100506913	"PREDICTED: Homo sapiens hypothetical LOC100506913, transcript variant 2 (LOC100506913), miscRNA [XR_110550]"	hs|10q11.21
A_21_P0006025	5.59661	ENST00000421482	BX088735	XLOC_007445	"BX088735 Soares_testis_NHT Homo sapiens cDNA clone IMAGp998C083329 ; IMAGE:1320511, mRNA sequence [BX088735]"	hs|9q22.1
A_33_P3302676	6.36567	ENST00000485159		TLE4	"transducin-like enhancer of split 4 (E(sp1) homolog, Drosophila) [Source:HGNC Symbol;Acc:11840] [ENST00000485159]"	hs|9q21.31
A_24_P49199	2.30626	NM_181789	NM_181789	GLDN	"Homo sapiens gliomedin (GLDN), mRNA [NM_181789]"	hs|15q21.2
A_21_P0002016	2.836	NR_038434	NR_038434	LOC100506474	"Homo sapiens uncharacterized LOC100506474 (LOC100506474), non-coding RNA [NR_038434]"	hs|2p24.3
A_21_P0001445	4.86965	NR_033883	NR_033883	LOC339529	"Homo sapiens uncharacterized LOC339529 (LOC339529), non-coding RNA [NR_033883]"	hs|1q44
A_19_P00319534	8.42975	NR_022008	NR_022008	PAR5	"Homo sapiens Prader-Willi/Angelman syndrome-5 (PAR5), non-coding RNA [NR_022008]"	hs|15q11.2
A_21_P0003350	12.7778	ENST00000514737	BG181206	XLOC_003504	"RST131 Athersys RAGE Library Homo sapiens cDNA, mRNA sequence [BG181206]"	hs|4p15.1
A_33_P3210258	4.4581	ENST00000390345	BC030554		T cell receptor gamma variable 4 [Source:HGNC Symbol;Acc:12289] [ENST00000390345]	hs|7p14.1
A_23_P354151	9.06947	NM_005546	NM_005546	ITK	"Homo sapiens IL2-inducible T-cell kinase (ITK), mRNA [NM_005546]"	hs|5q33.3
A_33_P3298092	7.1833	AK096139	AK096139	LOC100131756	"Homo sapiens cDNA FLJ38820 fis, clone LIVER2008473. [AK096139]"	hs|1p34.2
A_23_P370830	3.85434	NM_020805	NM_020805	KLHL14	"Homo sapiens kelch-like 14 (Drosophila) (KLHL14), mRNA [NM_020805]"	hs|18q12.1
A_21_P0004820	2.27583	TCONS_00011643		XLOC_005127	"BROAD Institute lincRNA (XLOC_005127), lincRNA [TCONS_00011643]"	hs|6p25.2
A_33_P3344209	3.07549	NM_024786	NM_024786	ZDHHC11	"Homo sapiens zinc finger, DHHC-type containing 11 (ZDHHC11), mRNA [NM_024786]"	hs|5p15.33
A_23_P148088	2.28399	NM_000509	NM_000509	FGG	"Homo sapiens fibrinogen gamma chain (FGG), transcript variant gamma-A, mRNA [NM_000509]"	hs|4q31.3
A_23_P320457	2.12741	NM_033088	NM_033088	FAM40A	"Homo sapiens family with sequence similarity 40, member A (FAM40A), mRNA [NM_033088]"	hs|1p13.3
A_21_P0013862	2.24401	ENST00000438026	BU602920	XLOC_l2_015706	"AGENCOURT_10012793 NIH_MGC_142 Homo sapiens cDNA clone IMAGE:6497858 5', mRNA sequence [BU602920]"	hs|Xp11.4
A_33_P3214422	3.02642	ENST00000483551	AK127498	ANP32A	"acidic (leucine-rich) nuclear phosphoprotein 32 family, member A [Source:HGNC Symbol;Acc:13233] [ENST00000483551]"	hs|15q23
A_24_P37712	3.23377	NM_003215	NM_003215	TEC	"Homo sapiens tec protein tyrosine kinase (TEC), mRNA [NM_003215]"	hs|4p12
A_33_P3285047	2.35454	NM_153028	NM_153028	ZNF75A	"Homo sapiens zinc finger protein 75a (ZNF75A), mRNA [NM_153028]"	hs|16p13.3
A_19_P00318860	8.45594	ENST00000553134	AF319524	XLOC_011183		hs|15q11.2
A_32_P190769	8.97487	NM_031911	NM_031911	C1QTNF7	"Homo sapiens C1q and tumor necrosis factor related protein 7 (C1QTNF7), transcript variant 3, mRNA [NM_031911]"	hs|4p15.32
A_21_P0001414	10.9841	TCONS_00001257		XLOC_000545	"BROAD Institute lincRNA (XLOC_000545), lincRNA [TCONS_00001257]"	hs|1q32.2
A_23_P90980	12.8264	NM_005383	NM_005383	NEU2	"Homo sapiens sialidase 2 (cytosolic sialidase) (NEU2), mRNA [NM_005383]"	hs|2q37.1
A_19_P00322166	5.13976	ENST00000503382		Q8YNJ1	"Q8YNJ1_ANASP (Q8YNJ1) Permease protein of phosphate ABC transporter, partial (6%) [THC2671932]"	hs|5p13.2
A_23_P19134	2.07494	NM_032119	NM_032119	GPR98	"Homo sapiens G protein-coupled receptor 98 (GPR98), transcript variant 1, mRNA [NM_032119]"	hs|5q14.3
A_23_P133691	17.0742	NM_021244	NM_021244	RRAGD	"Homo sapiens Ras-related GTP binding D (RRAGD), mRNA [NM_021244]"	hs|6q15
A_21_P0011518	7.70753	ENST00000437646		XLOC_l2_005690	"BROAD Institute lincRNA (XLOC_l2_005690), lincRNA [TCONS_l2_00011529]"	hs|17p11.2
A_23_P144264	2.23916	NM_014820	NM_014820	TOMM70A	"Homo sapiens translocase of outer mitochondrial membrane 70 homolog A (S. cerevisiae) (TOMM70A), nuclear gene encoding mitochondrial protein, mRNA [NM_014820]"	hs|3q12.2
A_33_P3226142	3.55934	ENST00000323223	AK097487		transmembrane protein 78 [Source:HGNC Symbol;Acc:32307] [ENST00000323223]	hs|1q42.13
A_33_P3331307	2.50148	NM_006449	NM_006449	CDC42EP3	"Homo sapiens CDC42 effector protein (Rho GTPase binding) 3 (CDC42EP3), mRNA [NM_006449]"	hs|2p22.2
A_33_P3420382	4.04058	AF370412	AF370412	LOC100131492	"Homo sapiens PP12901 mRNA, complete cds. [AF370412]"	hs|2q14.3
A_33_P3239914	3.38387	AK127222	AK127222	LOC100130741	"Homo sapiens cDNA FLJ45289 fis, clone BRHIP3002363. [AK127222]"	hs|7q36.3
A_21_P0008687	2.26486	XR_109226	XR_109226	LOC100507288	"PREDICTED: Homo sapiens hypothetical LOC100507288 (LOC100507288), miscRNA [XR_109226]"	hs|15q26.2
A_23_P136371	2.33655	NM_022569	NM_022569	NDST4	"Homo sapiens N-deacetylase/N-sulfotransferase (heparan glucosaminyl) 4 (NDST4), mRNA [NM_022569]"	hs|4q26
A_33_P3382754	6.90418	BF846222	BF846222		"PM0-EN0064-181000-001-f06 EN0064 Homo sapiens cDNA, mRNA sequence [BF846222]"	hs|15q21.1
A_21_P0005827	4.67611	TCONS_00014990		XLOC_007069	"BROAD Institute lincRNA (XLOC_007069), lincRNA [TCONS_00014990]"	hs|8p11.21
A_23_P213375	2.21263	NM_018936	NM_018936	PCDHB2	"Homo sapiens protocadherin beta 2 (PCDHB2), mRNA [NM_018936]"	hs|5q31.3
A_24_P14974	15.3023	NM_182537	NM_182537	HTR3D	"Homo sapiens 5-hydroxytryptamine (serotonin) receptor 3 family member D (HTR3D), transcript variant 2, mRNA [NM_182537]"	hs|3q27.1
A_33_P3420879	2.5302	BC015677	BC015677	LOC646482	"Homo sapiens cDNA clone IMAGE:4645784, partial cds. [BC015677]"	hs|13q12.13
A_23_P315212	6.29989	NM_012344	NM_012344	NTSR2	"Homo sapiens neurotensin receptor 2 (NTSR2), mRNA [NM_012344]"	hs|2p25.1
A_21_P0006421	2.97515	TCONS_00016984		XLOC_007966	"BROAD Institute lincRNA (XLOC_007966), lincRNA [TCONS_00016984]"	hs|Xp11.3
A_21_P0010361	3.63669	ENST00000434516	AK057489	XLOC_014247	"BROAD Institute lincRNA (XLOC_014247), lincRNA [TCONS_00029426]"	hs|22q13.1
A_21_P0014185	2.75304	XR_108741	XR_108741	LOC100505960	"PREDICTED: Homo sapiens hypothetical LOC100505960 (LOC100505960), miscRNA [XR_108741]"	hs|7p21.3
A_21_P0004215	17.7736	BC035069	BC035069	XLOC_004268	"ALU6_HUMAN (P39193) Alu subfamily SP sequence contamination warning entry, partial (4%) [THC2639867]"	hs|5p15.32
A_21_P0010301	3.61169	TCONS_00029179		XLOC_014118	"BROAD Institute lincRNA (XLOC_014118), lincRNA [TCONS_00029179]"	hs|21q22.3
A_21_P0014464	12.1753	XR_109949	XR_109949	LOC100507201	"PREDICTED: Homo sapiens hypothetical LOC100507201 (LOC100507201), miscRNA [XR_109949]"	hs|2p12
A_33_P3309222	6.31779	ENST00000400831	AL832737		Homo sapiens mRNA; cDNA DKFZp686H0413 (from clone DKFZp686H0413). [AL832737]	hs|6q27
A_33_P3268734	2.67857	CR748640	CR748640		"CR748640 Soares_NFL_T_GBC_S1 Homo sapiens cDNA clone IMAGp971L0898 ; IMAGE:2348699 5', mRNA sequence [CR748640]"	hs|9q34.3
A_23_P74870	42.6547	NM_025063	NM_025063	C1orf129	"Homo sapiens chromosome 1 open reading frame 129 (C1orf129), transcript variant 2, mRNA [NM_025063]"	hs|1q24.3
A_21_P0001044	2.38729	ENST00000420807		XLOC_000508	"Q6NT14_HUMAN (Q6NT14) ZNF80 protein (Fragment), partial (6%) [THC2736270]"	hs|1q31.2
A_21_P0007561	9.06565	TCONS_00020434		XLOC_009764	"BROAD Institute lincRNA (XLOC_009764), lincRNA [TCONS_00020434]"	hs|12q13.13
A_33_P3326447	2.08783	XM_003119544	XM_003119544	LOC100508384	"PREDICTED: Homo sapiens hypothetical protein LOC100508384 (LOC100508384), mRNA [XM_003119544]"	hs|12q24.33
A_21_P0012440	3.96817	NM_014831	NM_014831	TRANK1	"Homo sapiens tetratricopeptide repeat and ankyrin repeat containing 1 (TRANK1), mRNA [NM_014831]"	hs|3p22.2
A_21_P0000326	2.67774	NR_002971	NR_002971	SNORA38	"Homo sapiens small nucleolar RNA, H/ACA box 38 (SNORA38), small nucleolar RNA [NR_002971]"	hs|6p21.33
A_23_P30900	12.9321	ENST00000552745	BC008585		Uncharacterized protein [Source:UniProtKB/TrEMBL;Acc:E7ET45] [ENST00000552745]
A_24_P59459	3.25843	AK092226	AK092226	PIEZO2	"Homo sapiens cDNA FLJ34907 fis, clone NT2RI2003392. [AK092226]"	hs|18p11.22
A_19_P00315790	7.6485	NR_034007	NR_034007	LOC339894	"Homo sapiens uncharacterized LOC339894 (LOC339894), non-coding RNA [NR_034007]"	hs|3q25.31
A_33_P3341007	4.1572	ENST00000548231	AK097452		"Homo sapiens cDNA FLJ40133 fis, clone TESTI2012231. [AK097452]"	hs|15q25.1
A_33_P3349045	2.00926	NM_001008699	NM_001008699	IL4R	"Homo sapiens interleukin 4 receptor (IL4R), transcript variant 2, mRNA [NM_001008699]"	hs|16p12.1
A_33_P3280074	2.31637	NM_014619	NM_014619	GRIK4	"Homo sapiens glutamate receptor, ionotropic, kainate 4 (GRIK4), mRNA [NM_014619]"	hs|11q23.3
A_33_P3417650	6.78072	NM_002776	NM_002776	KLK10	"Homo sapiens kallikrein-related peptidase 10 (KLK10), transcript variant 1, mRNA [NM_002776]"	hs|19q13.41
A_33_P3409944	2.29883	NM_005272	NM_005272	GNAT2	"Homo sapiens guanine nucleotide binding protein (G protein), alpha transducing activity polypeptide 2 (GNAT2), mRNA [NM_005272]"	hs|1p13.3
A_21_P0001883	5.11717	ENST00000443419	BX101379	XLOC_001542	"BX101379 Soares_NFL_T_GBC_S1 Homo sapiens cDNA clone IMAGp998O054519, mRNA sequence [BX101379]"	hs|2p12
A_21_P0014058	6.57268	ENST00000461759	XR_108299	MGST3	"PREDICTED: Homo sapiens hypothetical LOC100505828 (LOC100505828), miscRNA [XR_108299]"	hs|1q24.1
A_19_P00319822	3.44179	ENST00000509244		Q952V6	"Q952V6_9SMEG (Q952V6) Cytochrome b (Fragment), partial (5%) [THC2780555]"	hs|4p15.33
A_23_P166438	2.08007	NM_030642	NM_030642	APOL5	"Homo sapiens apolipoprotein L, 5 (APOL5), mRNA [NM_030642]"	hs|22q12.3
A_21_P0001231	7.65061	ENST00000437416		XLOC_001228	"BROAD Institute lincRNA (XLOC_001228), lincRNA [TCONS_00000744]"	hs|1q42.12
A_21_P0012727	5.03902	ENST00000509559	BI465371	XLOC_l2_010687	"603201613F1 NIH_MGC_97 Homo sapiens cDNA clone IMAGE:5267426 5', mRNA sequence [BI465371]"	hs|4q13.1
A_21_P0007008	12.6068	THC2690543		XLOC_008883	"Q3W6C2_9ACTO (Q3W6C2) Acyl-CoA dehydrogenase, C-terminal, partial (7%) [THC2690543]"	hs|10q23.2
A_24_P235338	3.76916	NM_007332	NM_007332	TRPA1	"Homo sapiens transient receptor potential cation channel, subfamily A, member 1 (TRPA1), mRNA [NM_007332]"	hs|8q13.3
A_23_P107465	2.10602	NM_002277	NM_002277	KRT31	"Homo sapiens keratin 31 (KRT31), mRNA [NM_002277]"	hs|17q21.2
A_23_P51587	7.52167	NM_002924	NM_002924	RGS7	"Homo sapiens regulator of G-protein signaling 7 (RGS7), mRNA [NM_002924]"	hs|1q43
A_21_P0006705	2.2203	ENST00000428766	BI015673	XLOC_008619	"PM0-ET0208-280201-008-b07 ET0208 Homo sapiens cDNA, mRNA sequence [BI015673]"	hs|10q25.2
A_21_P0013703	2.51263	NR_033937	NR_033937	LOC100132077	"Homo sapiens uncharacterized LOC100132077 (LOC100132077), non-coding RNA [NR_033937]"	hs|9q22.32
A_24_P932016	2.01841	NM_031407	NM_031407	HUWE1	"Homo sapiens HECT, UBA and WWE domain containing 1 (HUWE1), mRNA [NM_031407]"	hs|Xp11.22
A_33_P3326882	15.0786	AK128135	AK128135	LOC100131032	"Homo sapiens cDNA FLJ46256 fis, clone TESTI4023654. [AK128135]"	hs|1q32.2
A_33_P3358893	2.29983	NM_002762	NM_002762	PRM2	"Homo sapiens protamine 2 (PRM2), mRNA [NM_002762]"	hs|16p13.13
A_23_P16573	2.74638	NM_019070	NM_019070	DDX49	"Homo sapiens DEAD (Asp-Glu-Ala-Asp) box polypeptide 49 (DDX49), transcript variant 1, mRNA [NM_019070]"	hs|19p13.11
A_23_P164100	3.13745	NM_181707	NM_181707	C17orf64	"Homo sapiens chromosome 17 open reading frame 64 (C17orf64), mRNA [NM_181707]"	hs|17q23.2
A_32_P812268	5.52872	NM_001001412	NM_001001412	CALHM1	"Homo sapiens calcium homeostasis modulator 1 (CALHM1), mRNA [NM_001001412]"	hs|10q24.33
A_33_P3293918	2.16207	NM_170600	NM_170600	SH2D3C	"Homo sapiens SH2 domain containing 3C (SH2D3C), transcript variant 1, mRNA [NM_170600]"	hs|9q34.11
A_21_P0000573	3.98172	NR_028595	NR_028595	CCDC162P	"Homo sapiens coiled-coil domain containing 162, pseudogene (CCDC162P), non-coding RNA [NR_028595]"	hs|6q21
A_33_P3294725	5.06239	NM_021118	NM_021118	CYLC1	"Homo sapiens cylicin, basic protein of sperm head cytoskeleton 1 (CYLC1), mRNA [NM_021118]"	hs|Xq21.1
A_33_P3312499	2.5383	NM_001098835	NM_001098835	MS4A15	"Homo sapiens membrane-spanning 4-domains, subfamily A, member 15 (MS4A15), transcript variant 1, mRNA [NM_001098835]"	hs|11q12.2
A_21_P0006264	14.3512	BQ025577	BQ025577	XLOC_007686	"UI-1-BB1p-axx-c-10-0-UI.s1 NCI_CGAP_Pl6 Homo sapiens cDNA clone UI-1-BB1p-axx-c-10-0-UI 3', mRNA sequence [BQ025577]"	hs|9p13.2
A_21_P0002226	3.10318	NR_034023	NR_034023	LOC339807	"Homo sapiens uncharacterized LOC339807 (LOC339807), non-coding RNA [NR_034023]"	hs|2p14
A_33_P3297606	21.0256	ENST00000463633	XM_496663	PLSCR2	phospholipid scramblase 2 [Source:HGNC Symbol;Acc:16494] [ENST00000463633]	hs|3q24
A_33_P3389573	2.38044	NM_052814	NM_052814	CARD9	"Homo sapiens caspase recruitment domain family, member 9 (CARD9), transcript variant 2, mRNA [NM_052814]"	hs|9q34.3
A_33_P3331916	14.8056	XR_132736	XR_132736	LOC440132	"PREDICTED: Homo sapiens hCG1815504 (LOC440132), miscRNA [XR_132736]"	hs|13q12.3
A_33_P3355580	9.03443	NR_027917	NR_027917	CTSL3	"Homo sapiens cathepsin L family member 3 (CTSL3), non-coding RNA [NR_027917]"	hs|9q22.1
A_32_P66020	2.12793	NM_032167	NM_032167	SNX29	"Homo sapiens sorting nexin 29 (SNX29), mRNA [NM_032167]"	hs|16p13.13
A_23_P64913	25.8235	NM_006205	NM_006205	PDE6H	"Homo sapiens phosphodiesterase 6H, cGMP-specific, cone, gamma (PDE6H), mRNA [NM_006205]"	hs|12p12.3
A_21_P0012334	3.75082	NR_040115	NR_040115	ANKRD62P1-PARP4P3	"Homo sapiens ANKRD62P1-PARP4P3 readthrough (non-protein coding) (ANKRD62P1-PARP4P3), non-coding RNA [NR_040115]"	hs|22q11.1
A_21_P0005227	7.88542	ENST00000440213	BC033981	XLOC_006059	"Q67T98_SYMTH (Q67T98) Polysulfide reductase subunit A, C-terminal domain, partial (7%) [THC2606566]"	hs|7p14.1
A_21_P0012850	2.71583	ENST00000515288	DA537977	XLOC_l2_011793	"DA537977 FEKID2 Homo sapiens cDNA clone FEKID2000691 5', mRNA sequence [DA537977]"	hs|5q31.3
A_21_P0000549	6.55886	NR_027927	NR_027927	COL6A4P1	"Homo sapiens collagen, type VI, alpha 4 pseudogene 1 (COL6A4P1), non-coding RNA [NR_027927]"	hs|3p25.1
A_33_P3241884	2.15255	NM_014654	NM_014654	SDC3	"Homo sapiens syndecan 3 (SDC3), mRNA [NM_014654]"	hs|1p35.2
A_21_P0005222	2.013	ENST00000446024	CR744744	XLOC_006044	"CR744744 Soares_testis_NHT Homo sapiens cDNA clone IMAGp971O0875 ; IMAGE:1735901 5', mRNA sequence [CR744744]"	hs|7p14.2
A_23_P66881	18.9524	NM_003835	NM_003835	RGS9	"Homo sapiens regulator of G-protein signaling 9 (RGS9), transcript variant 1, mRNA [NM_003835]"	hs|17q24.1
A_21_P0002301	15.972	TCONS_00003909		XLOC_001715	"BROAD Institute lincRNA (XLOC_001715), lincRNA [TCONS_00003909]"	hs|2q24.1
A_32_P204239	2.40675	NM_152750	NM_152750	CDHR3	"Homo sapiens cadherin-related family member 3 (CDHR3), mRNA [NM_152750]"	hs|7q22.3
A_19_P00804777	2.24249	AK022299	AK022299	XLOC_013282	"BROAD Institute lincRNA (XLOC_013282), lincRNA [TCONS_00027278]"	hs|19q11
A_33_P3318530	2.13242	NR_015364	NR_015364	LOC441204	"Homo sapiens uncharacterized locus LOC441204 (LOC441204), non-coding RNA [NR_015364]"	hs|7p15.2
A_33_P3323959	3.95444	NM_005045	NM_005045	RELN	"Homo sapiens reelin (RELN), transcript variant 1, mRNA [NM_005045]"	hs|7q22.1
A_21_P0005444	9.19082	NR_034033	NR_034033	LOC285972	"Homo sapiens uncharacterized LOC285972 (LOC285972), non-coding RNA [NR_034033]"	hs|7q36.1
A_33_P3282005	6.52333	NM_020335	NM_020335	VANGL2	"Homo sapiens vang-like 2 (van gogh, Drosophila) (VANGL2), mRNA [NM_020335]"	hs|1q23.2
A_33_P3371775	4.86881	AK130923	AK130923	LOC729187	"Homo sapiens cDNA FLJ27413 fis, clone WMC05327. [AK130923]"	hs|10q22.3
A_23_P17354	2.79469	NM_024034	NM_024034	GDAP1L1	"Homo sapiens ganglioside-induced differentiation-associated protein 1-like 1 (GDAP1L1), mRNA [NM_024034]"	hs|20q13.12
A_21_P0006970	3.42796	NR_027082	NR_027082	SFTA1P	"Homo sapiens surfactant associated 1, pseudogene (SFTA1P), non-coding RNA [NR_027082]"	hs|10p14
A_21_P0000733	33.4814	NR_038239	NR_038239	LOC100507629	"Homo sapiens uncharacterized LOC100507629 (LOC100507629), transcript variant 1, non-coding RNA [NR_038239]"	hs|20p12.3
A_23_P44867	9.42381	NM_016519	NM_016519	AMBN	"Homo sapiens ameloblastin (enamel matrix protein) (AMBN), mRNA [NM_016519]"	hs|4q13.3
A_21_P0003942	7.33124	ENST00000507389	XR_110569	XLOC_005005	"PREDICTED: Homo sapiens hypothetical LOC100506102 (LOC100506102), miscRNA [XR_110569]"	hs|5q31.1
A_21_P0007755	2.10935	BM697165	BM697165	XLOC_010190	"UI-E-DW0-agm-i-20-0-UI.r1 UI-E-DW0 Homo sapiens cDNA clone UI-E-DW0-agm-i-20-0-UI 5', mRNA sequence [BM697165]"	hs|12q23.3
A_33_P3225948	32.3108	NM_001042478	NM_001042478	AJAP1	"Homo sapiens adherens junctions associated protein 1 (AJAP1), transcript variant 2, mRNA [NM_001042478]"	hs|1p36.32
A_32_P701268	16.7821	NM_053002	NM_053002	MED12L	"Homo sapiens mediator complex subunit 12-like (MED12L), mRNA [NM_053002]"	hs|3q25.1
A_33_P3679936	3.57422	XR_109153	XR_109153	LOC283483	"PREDICTED: Homo sapiens hypothetical LOC283483 (LOC283483), miscRNA [XR_109153]"	hs|13q33.3
A_33_P3307945	4.67837	ENST00000409515	XM_003403420	LOC100652824	Uncharacterized protein [Source:UniProtKB/TrEMBL;Acc:E7EP55] [ENST00000409515]	hs|2q33.1
A_21_P0006673	15.7098	AK094093	AK094093	XLOC_008465	"Q5GH41_BRARE (Q5GH41) XK-related protein 5, partial (3%) [THC2622207]"	hs|10q11.21
A_21_P0004654	5.29063	ENST00000415106	XR_108661	XLOC_005315	"PREDICTED: Homo sapiens hypothetical LOC100505985 (LOC100505985), miscRNA [XR_108661]"	hs|6p12.3
A_23_P82795	51.9141	NR_040035	NR_040035	LINC00208	"Homo sapiens long intergenic non-protein coding RNA 208 (LINC00208), non-coding RNA [NR_040035]"	hs|8p23.1
A_21_P0013954	2.1773	XM_002345462	XM_002345462	LOC100292922	"PREDICTED: Homo sapiens ankyrin repeat domain-containing protein 30B-like (LOC100292922), mRNA [XM_002345462]"	hs|22q11.1
A_33_P3226835	5.12331	NM_025052	NM_025052	YSK4	"Homo sapiens YSK4 Sps1/Ste20-related kinase homolog (S. cerevisiae) (YSK4), transcript variant 1, mRNA [NM_025052]"	hs|2q21.3
A_21_P0000183	4.81747	NR_040434	NR_040434	LOC100505676	"Homo sapiens uncharacterized LOC100505676 (LOC100505676), non-coding RNA [NR_040434]"	hs|8q13.1
A_33_P3316440	34.041	ENST00000371228	AB020701		"Novel protein (KIAA0894)Sorbin and SH3 domain containing 1, isoform CRA_eUncharacterized protein [Source:UniProtKB/TrEMBL;Acc:Q5T925] [ENST00000371228]"	hs|10q24.1
A_33_P3239190	2.03962	ENST00000553435	BQ188841		"UI-E-EJ1-ajx-o-22-0-UI.r1 UI-E-EJ1 Homo sapiens cDNA clone UI-E-EJ1-ajx-o-22-0-UI 5', mRNA sequence [BQ188841]"	hs|14q32.13
A_33_P3399943	3.49631	NM_021135	NM_021135	RPS6KA2	"Homo sapiens ribosomal protein S6 kinase, 90kDa, polypeptide 2 (RPS6KA2), transcript variant 1, mRNA [NM_021135]"	hs|6q27
A_33_P3288125	4.81573	NR_040029	NR_040029	LOC284395	"Homo sapiens uncharacterized LOC284395 (LOC284395), non-coding RNA [NR_040029]"	hs|19q12
A_23_P139434	5.99571	NM_006248	NM_006248	PRB2	"Homo sapiens proline-rich protein BstNI subfamily 2 (PRB2), mRNA [NM_006248]"	hs|12p13.2
A_23_P168368	5.40844	NM_025031	NM_025031	C7orf69	"Homo sapiens chromosome 7 open reading frame 69 (C7orf69), mRNA [NM_025031]"	hs|7p12.3
A_23_P42241	4.60219	NM_030876	NM_030876	OR5V1	"Homo sapiens olfactory receptor, family 5, subfamily V, member 1 (OR5V1), mRNA [NM_030876]"	hs|6p22.1
A_33_P3758973	2.20255	AL137340	AL137340	DKFZP761C1711	Homo sapiens mRNA; cDNA DKFZp761C1711 (from clone DKFZp761C1711) [AL137340]	hs|11q14.1
A_33_P3631022	2.39387	AJ315134	AJ315134	LOC100270680	Homo sapiens C-MYC proto-oncogene regulatory region. [AJ315134]	hs|8q24.21
A_32_P225659	3.44848	NM_198152	NM_198152	UTS2D	"Homo sapiens urotensin 2 domain containing (UTS2D), mRNA [NM_198152]"	hs|3q28
A_23_P43690	2.01361	NM_017637	NM_017637	BNC2	"Homo sapiens basonuclin 2 (BNC2), mRNA [NM_017637]"	hs|9p22.3
A_33_P3243230	16.774	ENST00000401931		IL8	interleukin 8 [Source:HGNC Symbol;Acc:6025] [ENST00000401931]	hs|4q13.3
A_33_P3260787	10.8283	ENST00000342616	AK000925	RUFY2	RUN and FYVE domain containing 2 [Source:HGNC Symbol;Acc:19761] [ENST00000342616]	hs|10q21.3
A_23_P28224	11.5761	NM_006920	NM_006920	SCN1A	"Homo sapiens sodium channel, voltage-gated, type I, alpha subunit (SCN1A), transcript variant 2, mRNA [NM_006920]"	hs|2q24.3
A_33_P3290853	2.01302	ENST00000471935	X58796		T cell receptor beta variable 11-2 [Source:HGNC Symbol;Acc:12181] [ENST00000471935]	hs|7q34
A_24_P732099	4.18289	NR_001589	NR_001589	HBBP1	"Homo sapiens hemoglobin, beta pseudogene 1 (HBBP1), non-coding RNA [NR_001589]"	hs|11p15.4
A_23_P92650	16.4021	NM_031947	NM_031947	SLC25A2	"Homo sapiens solute carrier family 25 (mitochondrial carrier; ornithine transporter) member 2 (SLC25A2), nuclear gene encoding mitochondrial protein, mRNA [NM_031947]"	hs|5q31.3
A_24_P410610	2.3433	NM_001160301	NM_001160301	DPYD	"Homo sapiens dihydropyrimidine dehydrogenase (DPYD), transcript variant 2, mRNA [NM_001160301]"	hs|1p21.3
A_21_P0010314	2.0148	TCONS_00029225		XLOC_013950	"BROAD Institute lincRNA (XLOC_013950), lincRNA [TCONS_00029225]"	hs|21q22.3
A_23_P127267	5.26578	NM_005097	NM_005097	LGI1	"Homo sapiens leucine-rich, glioma inactivated 1 (LGI1), mRNA [NM_005097]"	hs|10q23.33
A_24_P268685	5.48513	NM_003042	NM_003042	SLC6A1	"Homo sapiens solute carrier family 6 (neurotransmitter transporter, GABA), member 1 (SLC6A1), mRNA [NM_003042]"	hs|3p25.3
A_24_P333571	11.282	ENST00000370217	BC022483	ARHGAP29	Rho GTPase activating protein 29 [Source:HGNC Symbol;Acc:30207] [ENST00000370217]	hs|1p22.1
A_21_P0012735	18.9006	ENST00000508358		XLOC_l2_010772	"BROAD Institute lincRNA (XLOC_l2_010772), lincRNA [TCONS_l2_00020665]"	hs|4q24
A_24_P290751	11.7523	NM_004416	NM_004416	DTX1	"Homo sapiens deltex homolog 1 (Drosophila) (DTX1), mRNA [NM_004416]"	hs|12q24.13
A_24_P418408	2.33634	NM_198552	NM_198552	FAM89A	"Homo sapiens family with sequence similarity 89, member A (FAM89A), mRNA [NM_198552]"	hs|1q42.2
A_23_P357316	21.5104	NM_173355	NM_173355	UPP2	"Homo sapiens uridine phosphorylase 2 (UPP2), transcript variant 1, mRNA [NM_173355]"	hs|2q24.1
A_33_P3285764	22.6494	ENST00000467013		EPHB1	EPH receptor B1 [Source:HGNC Symbol;Acc:3392] [ENST00000467013]	hs|3q22.2
A_23_P58993	4.59666	NM_005943	NM_005943	MOCS1	"Homo sapiens molybdenum cofactor synthesis 1 (MOCS1), transcript variant 1, mRNA [NM_005943]"	hs|6p21.2
A_24_P743802	2.15612	NM_133374	NM_133374	ZNF618	"Homo sapiens zinc finger protein 618 (ZNF618), mRNA [NM_133374]"	hs|9q32
A_21_P0002895	25.3784	ENST00000486545	BG195339	XLOC_003298	"RST14520 Athersys RAGE Library Homo sapiens cDNA, mRNA sequence [BG195339]"	hs|3q25.2
A_33_P3348719	2.83103	NM_002010	NM_002010	FGF9	"Homo sapiens fibroblast growth factor 9 (glia-activating factor) (FGF9), mRNA [NM_002010]"	hs|13q12.11
A_21_P0014232	4.21227	ENST00000440413	XR_108961	LOC100506231	"PREDICTED: Homo sapiens hypothetical LOC100506231 (LOC100506231), miscRNA [XR_108961]"	hs|9q34.11
A_23_P208768	17.1331	NM_002000	NM_002000	FCAR	"Homo sapiens Fc fragment of IgA, receptor for (FCAR), transcript variant 1, mRNA [NM_002000]"	hs|19q13.42
A_21_P0003985	3.73191	XR_108570	XR_108570	LOC100506406	"PREDICTED: Homo sapiens hypothetical LOC100506406 (LOC100506406), miscRNA [XR_108570]"	hs|5p13.2
A_23_P163195	26.249	NM_152447	NM_152447	LRFN5	"Homo sapiens leucine rich repeat and fibronectin type III domain containing 5 (LRFN5), mRNA [NM_152447]"	hs|14q21.1
A_21_P0004670	6.1716	ENST00000424506	BX093426	XLOC_005394	"BX093426 Soares_testis_NHT Homo sapiens cDNA clone IMAGp998E134451 ; IMAGE:1751412, mRNA sequence [BX093426]"	hs|6q16.1
A_21_P0006041	3.63928	ENST00000451108	BU929411	XLOC_007519	"AGENCOURT_10424154 NIH_MGC_79 Homo sapiens cDNA clone IMAGE:6663242 5', mRNA sequence [BU929411]"	hs|9q31.3
A_23_P73858	14.5259	NM_139214	NM_139214	TGIF2LY	"Homo sapiens TGFB-induced factor homeobox 2-like, Y-linked (TGIF2LY), mRNA [NM_139214]"	hs|Yp11.2
A_23_P23502	15.009	NM_001005185	NM_001005185	OR6N1	"Homo sapiens olfactory receptor, family 6, subfamily N, member 1 (OR6N1), mRNA [NM_001005185]"	hs|1q23.1
A_23_P131534	2.78877	NM_007227	NM_007227	GPR45	"Homo sapiens G protein-coupled receptor 45 (GPR45), mRNA [NM_007227]"	hs|2q12.1
A_19_P00318740	4.66409	ENST00000504068		Q9B8G3	"Q9B8G3_9NEOP (Q9B8G3) NADH dehydrogenase subunit 2, partial (5%) [THC2629318]"	hs|5q13.1
A_21_P0005584	12.4725	NR_034033	NR_034033	LOC285972	"Homo sapiens uncharacterized LOC285972 (LOC285972), non-coding RNA [NR_034033]"	hs|7q36.1
A_24_P226508	20.7024	NM_153612	NM_153612	HS3ST5	"Homo sapiens heparan sulfate (glucosamine) 3-O-sulfotransferase 5 (HS3ST5), mRNA [NM_153612]"	hs|6q21
A_19_P00800111	5.18721	ENST00000454679	XM_295865	C10orf112	"PREDICTED: Homo sapiens chromosome 10 open reading frame 112 (C10orf112), mRNA [XM_295865]"	hs|10p12.31
A_32_P30271	29.417	NM_001080523	NM_001080523	ARRDC5	"Homo sapiens arrestin domain containing 5 (ARRDC5), mRNA [NM_001080523]"	hs|19p13.3
A_21_P0000915	9.36695	ENST00000440762	BC041341	XLOC_000256	"ALU3_HUMAN (P39190) Alu subfamily SB1 sequence contamination warning entry, partial (18%) [THC2617426]"	hs|1p31.1
A_33_P3795644	7.08311	AJ011409	AJ011409	C21orf104	"Homo sapiens mRNA for hypothetical protein, partial. [AJ011409]"	hs|21q22.2
A_21_P0002138	3.26729	ENST00000426870		XLOC_002476	"Q6V9H6_ORYSA (Q6V9H6) Brown planthopper-induced resistance protein 1, partial (5%) [THC2763122]"	hs|2q34
A_23_P130113	2.00368	NM_080912	NM_080912	ASGR2	"Homo sapiens asialoglycoprotein receptor 2 (ASGR2), transcript variant H2', mRNA [NM_080912]"	hs|17p13.1
A_24_P59236	5.14026	NM_001007089	NM_001007089	RESP18	"Homo sapiens regulated endocrine-specific protein 18 homolog (rat) (RESP18), mRNA [NM_001007089]"	hs|2q35
A_33_P3239242	5.12981	NM_019073	NM_019073	SPATA6	"Homo sapiens spermatogenesis associated 6 (SPATA6), mRNA [NM_019073]"	hs|1p33
A_21_P0006857	3.46709	TCONS_00018162		XLOC_008454	"BROAD Institute lincRNA (XLOC_008454), lincRNA [TCONS_00018162]"	hs|10p11.21
A_23_P145054	4.34366	NM_001085480	NM_001085480	FAM162B	"Homo sapiens family with sequence similarity 162, member B (FAM162B), mRNA [NM_001085480]"	hs|6q22.1
A_21_P0009417	2.2865	THC2613887		XLOC_012574	"ALU1_HUMAN (P39188) Alu subfamily J sequence contamination warning entry, partial (6%) [THC2613887]"	hs|17q25.1
A_33_P3835524	2.03332	NM_001207026	NM_001207026	POU2F2	"Homo sapiens POU class 2 homeobox 2 (POU2F2), transcript variant 3, mRNA [NM_001207026]"	hs|19q13.2
A_23_P17192	2.52102	NM_007023	NM_007023	RAPGEF4	"Homo sapiens Rap guanine nucleotide exchange factor (GEF) 4 (RAPGEF4), transcript variant 1, mRNA [NM_007023]"	hs|2q31.1
A_19_P00322653	24.5981	NR_034143	NR_034143	LOC729177	"Homo sapiens uncharacterized LOC729177 (LOC729177), non-coding RNA [NR_034143]"	hs|6p22.3
A_33_P3663142	7.07058	NR_033875	NR_033875	FLJ12334	"Homo sapiens uncharacterized LOC400946 (FLJ12334), non-coding RNA [NR_033875]"	hs|2p24.1
A_21_P0000716	7.00461	NR_038135	NR_038135	LOC641515	"Homo sapiens uncharacterized LOC641515 (LOC641515), non-coding RNA [NR_038135]"	hs|1q32.1
A_21_P0003972	20.0663	ENST00000513041	CX759005	XLOC_004302	"AGENCOURT_40977101 NIH_MGC_278 Homo sapiens cDNA clone IMAGE:7773405 3', mRNA sequence [CX759005]"	hs|5p15.1
A_21_P0014328	8.72295	XR_109304	XR_109304	LOC100505722	"PREDICTED: Homo sapiens hypothetical LOC100505722 (LOC100505722), miscRNA [XR_109304]"	hs|16q12.2
A_33_P3258362	2.03134	NM_000517	NM_000517	HBA2	"Homo sapiens hemoglobin, alpha 2 (HBA2), mRNA [NM_000517]"	hs|16p13.3
A_33_P3334180	2.00429	ENST00000288766	AB527144	PLCH2	"phospholipase C, eta 2 [Source:HGNC Symbol;Acc:29037] [ENST00000288766]"	hs|1p36.32
A_23_P46238	2.12229	NM_033440	NM_033440	CELA2A	"Homo sapiens chymotrypsin-like elastase family, member 2A (CELA2A), mRNA [NM_033440]"	hs|1p36.21
A_21_P0003074	46.6339	TCONS_00006340		XLOC_002956	"BROAD Institute lincRNA (XLOC_002956), lincRNA [TCONS_00006340]"	hs|3q27.2
A_33_P3216282	2.64386	NR_024478	NR_024478	LOC100132354	"Homo sapiens uncharacterized LOC100132354 (LOC100132354), non-coding RNA [NR_024478]"	hs|6p21.1
A_23_P51690	3.86049	NM_020407	NM_020407	RHBG	"Homo sapiens Rh family, B glycoprotein (gene/pseudogene) (RHBG), transcript variant 1, mRNA [NM_020407]"	hs|1q22
A_23_P160336	4.89359	NM_020997	NM_020997	LEFTY1	"Homo sapiens left-right determination factor 1 (LEFTY1), mRNA [NM_020997]"	hs|1q42.12
A_33_P3233608	3.11603	NM_145664	NM_145664	SPANXB2	"Homo sapiens SPANX family, member B2 (SPANXB2), mRNA [NM_145664]"	hs|Xq27.1
A_23_P81825	6.20353	NM_002098	NM_002098	GUCA1B	"Homo sapiens guanylate cyclase activator 1B (retina) (GUCA1B), mRNA [NM_002098]"	hs|6p21.1
A_21_P0012764	20.8312	ENST00000513681	BC092460	XLOC_l2_011007	"BROAD Institute lincRNA (XLOC_l2_011007), lincRNA [TCONS_l2_00021807]"	hs|4q35.2
A_21_P0006594	10.0477	NR_001545	NR_001545	TTTY15	"Homo sapiens testis-specific transcript, Y-linked 15 (non-protein coding) (TTTY15), non-coding RNA [NR_001545]"	hs|Yq11.21
A_23_P26457	2.11956	NM_000517	NM_000517	HBA2	"Homo sapiens hemoglobin, alpha 2 (HBA2), mRNA [NM_000517]"	hs|16p13.3
A_21_P0000952	5.18367	ENST00000430540	BX113695	XLOC_000070	"BX113695 Soares_testis_NHT Homo sapiens cDNA clone IMAGp998L123517, mRNA sequence [BX113695]"	hs|1p36.13
A_23_P86079	4.87025	NM_001145210	NM_001145210	ANKRD65	"Homo sapiens ankyrin repeat domain 65 (ANKRD65), transcript variant 1, mRNA [NM_001145210]"	hs|1p36.33
A_21_P0000198	7.4185	NM_022784	NM_022784	IQCH	"Homo sapiens IQ motif containing H (IQCH), transcript variant 2, mRNA [NM_022784]"	hs|15q23
A_33_P3278330	3.06873	BC033059	BC033059	FLJ16124	"Homo sapiens FLJ16124 protein, mRNA (cDNA clone MGC:43245 IMAGE:5264239), complete cds. [BC033059]"	hs|2p14
A_21_P0014342	42.6166	ENST00000414776	XR_109350	LOC100506397	"PREDICTED: Homo sapiens hypothetical LOC100506397 (LOC100506397), miscRNA [XR_109350]"	hs|17p13.3
A_21_P0010154	2.22669	ENST00000458316	BC039446	XLOC_013900	"BROAD Institute lincRNA (XLOC_013900), lincRNA [TCONS_00028827]"	hs|21q21.3
A_21_P0005758	11.7201	TCONS_00014847		XLOC_006911	"BROAD Institute lincRNA (XLOC_006911), lincRNA [TCONS_00014847]"	hs|8q24.13
A_23_P23048	2.56719	NM_002965	NM_002965	S100A9	"Homo sapiens S100 calcium binding protein A9 (S100A9), mRNA [NM_002965]"	hs|1q21.3
A_21_P0004162	12.4538	ENST00000507050	BX095244	XLOC_004942	"BX095244 Soares_NFL_T_GBC_S1 Homo sapiens cDNA clone IMAGp998D184515, mRNA sequence [BX095244]"	hs|5q21.1
A_23_P54576	2.0593	NM_005550	NM_005550	KIFC3	"Homo sapiens kinesin family member C3 (KIFC3), transcript variant 1, mRNA [NM_005550]"	hs|16q21
A_21_P0014106	9.13949	XR_108460	XR_108460	MORC1-AS1	"PREDICTED: Homo sapiens hypothetical LOC100506506 (LOC100506506), miscRNA [XR_108460]"	hs|3q13.13
A_23_P6943	5.85952	NM_005290	NM_005290	GPR15	"Homo sapiens G protein-coupled receptor 15 (GPR15), mRNA [NM_005290]"	hs|3q11.2
A_33_P3364211	3.17168	AK126423	AK126423		"Homo sapiens cDNA FLJ44459 fis, clone UTERU2024656. [AK126423]"	hs|3p13
A_33_P3409234	6.86657	DA399191	DA399191		"DA399191 BRTHA3 Homo sapiens cDNA clone BRTHA3001578 5', mRNA sequence [DA399191]"	hs|10q26.13
A_33_P3306823	19.562	NM_001077624	NM_001077624	ZNF846	"Homo sapiens zinc finger protein 846 (ZNF846), mRNA [NM_001077624]"	hs|19p13.2
A_33_P3299535	8.24841	NM_183378	NM_183378	OVCH1	"Homo sapiens ovochymase 1 (OVCH1), mRNA [NM_183378]"	hs|12p11.22
A_21_P0014158	5.75185	ENST00000373404	XR_108640	LOC100505530	"PREDICTED: Homo sapiens hypothetical LOC100505530 (LOC100505530), miscRNA [XR_108640]"	hs|6p21.2
A_21_P0002564	8.16873	TCONS_00004669		XLOC_001314	"BROAD Institute lincRNA (XLOC_001314), lincRNA [TCONS_00004669]"	hs|2p25.3
A_33_P3234138	6.57864	NR_036433	NR_036433	FAM172BP	"Homo sapiens family with sequence similarity 172, member B, pseudogene (FAM172BP), non-coding RNA [NR_036433]"	hs|3q12.3
A_21_P0007392	2.62501	TCONS_00019743		XLOC_009537	"BROAD Institute lincRNA (XLOC_009537), lincRNA [TCONS_00019743]"	hs|11q22.3
A_33_P3327519	7.09321	NR_002915	NR_002915	SNORA74A	"Homo sapiens small nucleolar RNA, H/ACA box 74A (SNORA74A), small nucleolar RNA [NR_002915]"	hs|5q31.2
A_21_P0006573	27.4218	NR_038461	NR_038461	LOC100128420	"Homo sapiens uncharacterized LOC100128420 (LOC100128420), transcript variant 1, non-coding RNA [NR_038461]"	hs|Xq26.3
A_33_P3357759	3.27305	XM_291007	XM_291007	HEATR7B1	"PREDICTED: Homo sapiens HEAT repeat containing 7B1 (HEATR7B1), mRNA [XM_291007]"	hs|2q37.1
A_33_P3304304	2.566	ENST00000394478		STAG2	stromal antigen 2 [Source:HGNC Symbol;Acc:11355] [ENST00000394478]	hs|Xq25
A_33_P3283550	2.2704	ENST00000463881	XM_003118918	LOC100507650	chromosome 14 open reading frame 164 [Source:HGNC Symbol;Acc:20438] [ENST00000463881]	hs|14q11.2
A_21_P0010902	6.9319	ENST00000447757	CR741727	XLOC_l2_002100	"CR741727 Soares_testis_NHT Homo sapiens cDNA clone IMAGp971J0269 ; IMAGE:1641700 5', mRNA sequence [CR741727]"	hs|10q25.1
A_33_P3495234	14.6478	AJ276510	AJ276510	ORF1	"Homo sapiens partial mRNA for hypothetical protein (ORF1), clone pT-Adv JuaX22. [AJ276510]"	hs|18q23
A_21_P0003325	7.80518	ENST00000514265	CR604304	XLOC_004072	full-length cDNA clone CS0DI087YM02 of Placenta Cot 25-normalized of Homo sapiens (human) [CR604304]	hs|4q28.2
A_23_P163075	2.20553	NM_001206920	NM_001206920	SLC35F4	"Homo sapiens solute carrier family 35, member F4 (SLC35F4), mRNA [NM_001206920]"	hs|14q22.3
A_23_P352932	12.0256	NM_052918	NM_052918	SORCS1	"Homo sapiens sortilin-related VPS10 domain containing receptor 1 (SORCS1), transcript variant 1, mRNA [NM_052918]"	hs|10q25.1
A_32_P810645	5.89017	AK097607	AK097607	FLJ40288	"Homo sapiens cDNA FLJ40288 fis, clone TESTI2028098. [AK097607]"	hs|7q32.3
A_33_P3366261	4.94428	NR_038829	NR_038829	LOC649133	"Homo sapiens uncharacterized LOC649133 (LOC649133), non-coding RNA [NR_038829]"	hs|11q23.3
A_21_P0008110	6.50526	AK095506	AK095506	CLYBL	"Q8TDH8_HUMAN (Q8TDH8) Citrate lyase beta subunit (Citrate lyase beta like), complete [THC2486969]"	hs|13q32.3
A_23_P79251	2.21828	NM_014600	NM_014600	EHD3	"Homo sapiens EH-domain containing 3 (EHD3), mRNA [NM_014600]"	hs|2p23.1
A_24_P935345	3.16622	ENST00000378432	AY358191		NINP6167Uncharacterized protein [Source:UniProtKB/TrEMBL;Acc:Q6UXV6] [ENST00000378432]	hs|19q13.2
A_21_P0004555	4.40843	THC2615207		XLOC_004800	"Q5KTX4_9VIRI (Q5KTX4) MADS-box protein CpMADS1 (Fragment), partial (7%) [THC2615207]"
A_21_P0006104	5.22412	ENST00000423637	BC034316	XLOC_007834	"BROAD Institute lincRNA (XLOC_007834), lincRNA [TCONS_00015874]"	hs|9q33.1
A_33_P3269000	4.92386	NM_001007090	NM_001007090	C8orf48	"Homo sapiens chromosome 8 open reading frame 48 (C8orf48), mRNA [NM_001007090]"	hs|8p22
A_21_P0000065	2.13785	NM_001166696	NM_001166696	SLC1A3	"Homo sapiens solute carrier family 1 (glial high affinity glutamate transporter), member 3 (SLC1A3), transcript variant 3, mRNA [NM_001166696]"	hs|5p13.2
A_33_P3237215	2.60274	NM_033506	NM_033506	FBXO24	"Homo sapiens F-box protein 24 (FBXO24), transcript variant 1, mRNA [NM_033506]"	hs|7q22.1
A_21_P0012412	10.2443	NR_021485	NR_021485	EGFEM1P	"Homo sapiens EGF-like and EMI domain containing 1, pseudogene (EGFEM1P), non-coding RNA [NR_021485]"	hs|3q26.2
A_21_P0014372	12.0019	XR_109495	XR_109495	LOC100506174	"PREDICTED: Homo sapiens hypothetical LOC100506174 (LOC100506174), miscRNA [XR_109495]"	hs|19q13.41
A_23_P80242	6.13104	NM_021115	NM_021115	SEZ6L	"Homo sapiens seizure related 6 homolog (mouse)-like (SEZ6L), transcript variant 1, mRNA [NM_021115]"	hs|22q12.1
A_33_P3408655	2.59697	AK310676	AK310676	CD2	"Homo sapiens cDNA, FLJ17718. [AK310676]"	hs|1p13.1
A_33_P3591321	2.2376	BI767459	BI767459	C8orf28	"603057322F1 NIH_MGC_122 Homo sapiens cDNA clone IMAGE:5206805 5', mRNA sequence [BI767459]"	hs|8q21.13
A_23_P337867	72.9382	NM_176883	NM_176883	TAS2R41	"Homo sapiens taste receptor, type 2, member 41 (TAS2R41), mRNA [NM_176883]"	hs|7q35
A_21_P0014655	8.96236	XR_110918	XR_110918	LOC100507675	"PREDICTED: Homo sapiens hypothetical LOC100507675, transcript variant 1 (LOC100507675), miscRNA [XR_110918]"	hs|11q13.1
A_33_P3232552	2.14068	NM_000857	NM_000857	GUCY1B3	"Homo sapiens guanylate cyclase 1, soluble, beta 3 (GUCY1B3), mRNA [NM_000857]"	hs|4q32.1
A_33_P3369975	4.35883	NM_001004687	NM_001004687	OR2L3	"Homo sapiens olfactory receptor, family 2, subfamily L, member 3 (OR2L3), mRNA [NM_001004687]"	hs|1q44
A_33_P3626360	2.24397	AF547222	AF547222	LOC280665	"Homo sapiens putative anti-CNG alpha 1 cation channel translation product mRNA, complete cds. [AF547222]"	hs|4p12
A_23_P210224	3.02805	NM_020134	NM_020134	DPYSL5	"Homo sapiens dihydropyrimidinase-like 5 (DPYSL5), mRNA [NM_020134]"	hs|2p23.3
A_33_P3365387	6.77264	AK127261	AK127261	LOC401557	"Homo sapiens cDNA FLJ45328 fis, clone BRHIP3007172. [AK127261]"	hs|9q34.3
A_21_P0010164	3.40576	ENST00000419826	CR624487	XLOC_013946	full-length cDNA clone CS0DI026YO17 of Placenta Cot 25-normalized of Homo sapiens (human) [CR624487]	hs|21q22.2
A_33_P3751193	2.48531	BG168244	BG168244	LOC730139	"602339567F1 NIH_MGC_89 Homo sapiens cDNA clone IMAGE:4447481 5', mRNA sequence [BG168244]"	hs|3q27.3
A_23_P124892	2.77407	NM_002256	NM_002256	KISS1	"Homo sapiens KiSS-1 metastasis-suppressor (KISS1), mRNA [NM_002256]"	hs|1q32.1
A_21_P0007558	3.41026	TCONS_00020424		XLOC_009752	"BROAD Institute lincRNA (XLOC_009752), lincRNA [TCONS_00020424]"	hs|12q13.13
A_33_P3356776	3.61755	NM_001010917	NM_001010917	GOLGA7B	"Homo sapiens golgin A7 family, member B (GOLGA7B), mRNA [NM_001010917]"	hs|10q24.2
A_24_P237583	2.00453	NM_130896	NM_130896	WFDC8	"Homo sapiens WAP four-disulfide core domain 8 (WFDC8), transcript variant a, mRNA [NM_130896]"	hs|20q13.12
A_21_P0003979	2.15638	AK309747	AK309747	XLOC_004320	"BROAD Institute lincRNA (XLOC_004320), lincRNA [TCONS_00009372]"	hs|5p14.1
A_21_P0007120	2.60465	ENST00000531977		XLOC_008982	"BROAD Institute lincRNA (XLOC_008982), lincRNA [TCONS_00019046]"	hs|10q26.13
A_33_P3262470	2.02911	ENST00000493476	AB464252	SERP2	stress-associated endoplasmic reticulum protein family member 2 [Source:HGNC Symbol;Acc:20607] [ENST00000493476]	hs|13q14.11
A_33_P3235731	4.89556	AF370371	AF370371		"Homo sapiens FP248 mRNA, complete cds. [AF370371]"	hs|8q24.3
A_33_P3311145	5.32682	NM_014956	NM_014956	CEP164	"Homo sapiens centrosomal protein 164kDa (CEP164), mRNA [NM_014956]"	hs|11q23.3
A_23_P136125	2.12018	NM_005141	NM_005141	FGB	"Homo sapiens fibrinogen beta chain (FGB), transcript variant 1, mRNA [NM_005141]"	hs|4q31.3
A_33_P3326777	2.30706	NM_001170692	NM_001170692	CAGE1	"Homo sapiens cancer antigen 1 (CAGE1), transcript variant 1, mRNA [NM_001170692]"	hs|6p24.3
A_21_P0002098	2.15571	ENST00000432894	DA677089	XLOC_002303	"DA677089 NETRP2 Homo sapiens cDNA clone NETRP2008290 5', mRNA sequence [DA677089]"	hs|2q14.3
A_23_P3911	-2.30555	NM_020405	NM_020405	PLXDC1	"Homo sapiens plexin domain containing 1 (PLXDC1), mRNA [NM_020405]"	hs|17q12
A_33_P3355599	-21.0342	NM_018940	NM_018940	PCDHB7	"Homo sapiens protocadherin beta 7 (PCDHB7), mRNA [NM_018940]"	hs|5q31.3
A_33_P3310415	-8.95509	AY358259	AY358259		"Homo sapiens clone DNA175919 FLFF9364 (UNQ9364) mRNA, complete cds. [AY358259]"	hs|6p23
A_33_P3257574	-17.3466	AK125006	AK125006		"Homo sapiens cDNA FLJ43016 fis, clone BRTHA2016543. [AK125006]"	hs|6q15
A_21_P0012064	-25.9566	CR600703	CR600703	XLOC_l2_007986	full-length cDNA clone CS0DE006YH09 of Placenta of Homo sapiens (human) [CR600703]	hs|2p21
A_21_P0012307	-2.62318	BC107743	BC107743	psiTPTE22	"BROAD Institute lincRNA (XLOC_l2_009281), lincRNA [TCONS_l2_00018139]"	hs|22q11.1
A_23_P170901	-7.86629	NM_152410	NM_152410	PACRG	"Homo sapiens PARK2 co-regulated (PACRG), transcript variant 1, mRNA [NM_152410]"	hs|6q26
A_21_P0013788	-6.78435	ENST00000276185	XM_003403861	FRMPD3	"PREDICTED: Homo sapiens FERM and PDZ domain containing 3 (FRMPD3), mRNA [XM_003403861]"	hs|Xq22.3
A_33_P3346348	-2.12715	NM_001145088	NM_001145088	WDR67	"Homo sapiens WD repeat domain 67 (WDR67), transcript variant 2, mRNA [NM_001145088]"	hs|8q24.13
A_23_P395954	-2.57028	ENST00000394848	AB072358	SSH2	slingshot homolog 2 (Drosophila) [Source:HGNC Symbol;Acc:30580] [ENST00000394848]	hs|17q11.2
A_33_P3259403	-11.7924	NM_175854	NM_175854	PAN3	"Homo sapiens PAN3 poly(A) specific ribonuclease subunit homolog (S. cerevisiae) (PAN3), mRNA [NM_175854]"	hs|13q12.2
A_21_P0014151	-2.3125	XR_108264	XR_108264	LOC100506851	"PREDICTED: Homo sapiens hypothetical LOC100506851 (LOC100506851), miscRNA [XR_108264]"	hs|6q14.1
A_23_P126363	-38.3786	NM_021794	NM_021794	ADAM30	"Homo sapiens ADAM metallopeptidase domain 30 (ADAM30), mRNA [NM_021794]"	hs|1p12
A_33_P3227904	-2.46806	NM_207348	NM_207348	SLC25A34	"Homo sapiens solute carrier family 25, member 34 (SLC25A34), mRNA [NM_207348]"	hs|1p36.21
A_23_P432013	-2.14271	NM_175056	NM_175056	ZPLD1	"Homo sapiens zona pellucida-like domain containing 1 (ZPLD1), mRNA [NM_175056]"	hs|3q12.3
A_23_P111194	-2.34629	NM_012391	NM_012391	SPDEF	"Homo sapiens SAM pointed domain containing ets transcription factor (SPDEF), transcript variant 1, mRNA [NM_012391]"	hs|6p21.31
A_24_P411121	-2.57851	NM_148901	NM_148901	TNFRSF18	"Homo sapiens tumor necrosis factor receptor superfamily, member 18 (TNFRSF18), transcript variant 2, mRNA [NM_148901]"	hs|1p36.33
A_24_P314534	-12.2154	NM_181621	NM_181621	KRTAP13-2	"Homo sapiens keratin associated protein 13-2 (KRTAP13-2), nuclear gene encoding mitochondrial protein, mRNA [NM_181621]"	hs|21q22.11
A_21_P0014419	-10.5883	ENST00000540720	XR_109699	LOC100287576	"PREDICTED: Homo sapiens hypothetical LOC100287576 (LOC100287576), miscRNA [XR_109699]"	hs|22q11.21
A_21_P0005622	-33.56	ENST00000426023	XR_133487	XLOC_007085	"PREDICTED: Homo sapiens hypothetical LOC100507516 (LOC100507516), miscRNA [XR_133487]"	hs|8q11.23
A_33_P3230990	-2.62237	NM_173050	NM_173050	SCUBE1	"Homo sapiens signal peptide, CUB domain, EGF-like 1 (SCUBE1), mRNA [NM_173050]"	hs|22q13.2
A_24_P307808	-2.19827	NM_020768	NM_020768	KCTD16	"Homo sapiens potassium channel tetramerisation domain containing 16 (KCTD16), mRNA [NM_020768]"	hs|5q31.3
A_21_P0012344	-6.44291	ENST00000443839	BC035867	XLOC_l2_009469	"Q6ZPR5_MOUSE (Q6ZPR5) MKIAA1418 protein (Fragment), partial (16%) [THC2605157]"	hs|22q11.21
A_23_P129425	-2.41698	NM_018430	NM_018430	TSNAXIP1	"Homo sapiens translin-associated factor X interacting protein 1 (TSNAXIP1), mRNA [NM_018430]"	hs|16q22.1
A_23_P91970	-9.78696	NM_207365	NM_207365	AADACL2	"Homo sapiens arylacetamide deacetylase-like 2 (AADACL2), mRNA [NM_207365]"	hs|3q25.1
A_33_P3420327	-45.1789	CA413366	CA413366	RPPH1	"UI-H-EU1-bae-h-06-0-UI.s1 NCI_CGAP_Ct1 Homo sapiens cDNA clone UI-H-EU1-bae-h-06-0-UI 3', mRNA sequence [CA413366]"	hs|14q11.2
A_23_P9883	-2.01464	NM_001079821	NM_001079821	NLRP3	"Homo sapiens NLR family, pyrin domain containing 3 (NLRP3), transcript variant 3, mRNA [NM_001079821]"	hs|1q44
A_23_P402123	-18.3663	NM_019599	NM_019599	TAS2R1	"Homo sapiens taste receptor, type 2, member 1 (TAS2R1), mRNA [NM_019599]"	hs|5p15.31
A_23_P49145	-2.13612	NM_152338	NM_152338	ZG16	"Homo sapiens zymogen granule protein 16 homolog (rat) (ZG16), mRNA [NM_152338]"	hs|16p11.2
A_33_P3566559	-18.8375	NR_037890	NR_037890	DNAJB8-AS1	"Homo sapiens DNAJB8 antisense RNA 1 (non-protein coding) (DNAJB8-AS1), non-coding RNA [NR_037890]"	hs|3q21.3
A_33_P3419790	-2.96414	ENST00000379413	AK123258	C6orf105	chromosome 6 open reading frame 105 [Source:HGNC Symbol;Acc:21214] [ENST00000379413]	hs|6p24.1
A_21_P0000400	-32.6865	NR_003195	NR_003195	SNORD114-3	"Homo sapiens small nucleolar RNA, C/D box 114-3 (SNORD114-3), small nucleolar RNA [NR_003195]"	hs|14q32.31
A_32_P115050	-2.0517	NR_037595	NR_037595	LOC646576	"Homo sapiens uncharacterized LOC646576 (LOC646576), non-coding RNA [NR_037595]"	hs|4q31.21
A_23_P202071	-12.1235	NM_001025077	NM_001025077	CELF2	"Homo sapiens CUGBP, Elav-like family member 2 (CELF2), transcript variant 3, mRNA [NM_001025077]"	hs|10p14
A_23_P79302	-5.32928	NM_177964	NM_177964	LYPD6B	"Homo sapiens LY6/PLAUR domain containing 6B (LYPD6B), mRNA [NM_177964]"	hs|2q23.2
A_33_P3801258	-12.5852	NR_040247	NR_040247	DAOA-AS1	"Homo sapiens DAOA antisense RNA 1 (non-protein coding) (DAOA-AS1), non-coding RNA [NR_040247]"	hs|13q33.2
A_24_P226332	-22.0652	NM_004440	NM_004440	EPHA7	"Homo sapiens EPH receptor A7 (EPHA7), mRNA [NM_004440]"	hs|6q16.1
A_33_P3289167	-5.63672	NM_014383	NM_014383	ZBTB32	"Homo sapiens zinc finger and BTB domain containing 32 (ZBTB32), mRNA [NM_014383]"	hs|19q13.12
A_21_P0002624	-6.13529	TCONS_00004986		XLOC_001823	"BROAD Institute lincRNA (XLOC_001823), lincRNA [TCONS_00004986]"	hs|2q33.3
A_19_P00322498	-14.5019	THC2512099		Q7VPR2	"Q7VPR2_CHLPN (Q7VPR2) ABC transporter, partial (4%) [THC2553849]"	hs|15q22.32
A_24_P98762	-6.91456	NM_002716	NM_002716	PPP2R1B	"Homo sapiens protein phosphatase 2, regulatory subunit A, beta (PPP2R1B), transcript variant 1, mRNA [NM_002716]"	hs|11q23.1
A_23_P80551	-22.89	NM_001205272	NM_001205272	KRBOX1	"Homo sapiens KRAB box domain containing 1 (KRBOX1), mRNA [NM_001205272]"	hs|3p22.1
A_23_P16022	-19.5834	NM_005773	NM_005773	ZNF256	"Homo sapiens zinc finger protein 256 (ZNF256), mRNA [NM_005773]"	hs|19q13.43
A_21_P0002672	-55.9866	TCONS_00005219		XLOC_002241	"BROAD Institute lincRNA (XLOC_002241), lincRNA [TCONS_00005219]"	hs|2q12.1
A_33_P3347437	-12.0542	NR_033830	NR_033830	FLJ39080	"Homo sapiens uncharacterized LOC441355 (FLJ39080), non-coding RNA [NR_033830]"	hs|8q21.11
A_24_P167377	-7.81587	NM_206899	NM_206899	OR10P1	"Homo sapiens olfactory receptor, family 10, subfamily P, member 1 (OR10P1), mRNA [NM_206899]"	hs|12q13.2
A_21_P0007207	-40.5919	ENST00000525926	BX094201	XLOC_009122	"BX094201 Soares_testis_NHT Homo sapiens cDNA clone IMAGp998K144113, mRNA sequence [BX094201]"	hs|11p11.2
A_23_P98121	-3.15117	NM_173160	NM_173160	FXYD4	"Homo sapiens FXYD domain containing ion transport regulator 4 (FXYD4), transcript variant 1, mRNA [NM_173160]"	hs|10q11.21
A_32_P486693	-3.98115	NM_020645	NM_020645	NRIP3	"Homo sapiens nuclear receptor interacting protein 3 (NRIP3), mRNA [NM_020645]"	hs|11p15.4
A_21_P0006609	-3.11359	NR_026793	NR_026793	LINC00264	"Homo sapiens long intergenic non-protein coding RNA 264 (LINC00264), non-coding RNA [NR_026793]"	hs|10p12.1
A_23_P307392	-2.81406	AK024141	AK024141	DPF3	"Homo sapiens cDNA FLJ14079 fis, clone HEMBB1002134, weakly similar to ZINC-FINGER PROTEIN NEURO-D4. [AK024141]"	hs|14q24.2
A_21_P0006632	-7.58122	AK056101	AK056101	XLOC_008340	"ALU1_HUMAN (P39188) Alu subfamily J sequence contamination warning entry, partial (14%) [THC2522763]"	hs|10p15.3
A_23_P120794	-2.909	NM_004173	NM_004173	SLC7A4	"Homo sapiens solute carrier family 7 (orphan transporter), member 4 (SLC7A4), mRNA [NM_004173]"	hs|22q11.21
A_21_P0010158	-21.5997	ENST00000424837	BX095520	XLOC_013918	"BX095520 Soares_testis_NHT Homo sapiens cDNA clone IMAGp998F154164, mRNA sequence [BX095520]"	hs|21q22.11
A_21_P0014892	-5.71393	XR_132852	XR_132852	LOC100506027	"PREDICTED: Homo sapiens hypothetical LOC100506027, transcript variant 2 (LOC100506027), miscRNA [XR_132852]"	hs|7q21.3
A_24_P601831	-3.40501	NR_026969	NR_026969	LINC00326	"Homo sapiens long intergenic non-protein coding RNA 326 (LINC00326), non-coding RNA [NR_026969]"	hs|6q23.2
A_21_P0014049	-4.92511	NR_027420	NR_027420	LOC389834	"Homo sapiens ankyrin repeat domain 57 pseudogene (LOC389834), non-coding RNA [NR_027420]"	hs|21p11.2
A_33_P3368383	-6.50093	NR_027246	NR_027246	LINC00314	"Homo sapiens long intergenic non-protein coding RNA 314 (LINC00314), non-coding RNA [NR_027246]"	hs|21q21.3
A_33_P3309799	-2.16657	NM_006778	NM_006778	TRIM10	"Homo sapiens tripartite motif containing 10 (TRIM10), transcript variant 1, mRNA [NM_006778]"	hs|6p22.1
A_33_P3406866	-2.02117	NM_001005388	NM_001005388	NFASC	"Homo sapiens neurofascin (NFASC), transcript variant 1, mRNA [NM_001005388]"	hs|1q32.1
A_33_P3384272	-4.43145	ENST00000369494		ATP1A1	"ATPase, Na+/K+ transporting, alpha 1 polypeptide [Source:HGNC Symbol;Acc:799] [ENST00000369494]"	hs|1p13.1
A_24_P892472	-10.281	NR_002791	NR_002791	EMX2OS	"Homo sapiens EMX2 opposite strand/antisense RNA (non-protein coding) (EMX2OS), non-coding RNA [NR_002791]"	hs|10q26.11
A_21_P0011710	-5.68929	TCONS_l2_00012688		XLOC_l2_006812	"BROAD Institute lincRNA (XLOC_l2_006812), lincRNA [TCONS_l2_00012688]"	hs|19q13.42
A_21_P0004106	-14.0783	ENST00000513157	BC042074	XLOC_004743	"MERVLPOLY Pro-Pol-dUTPase polyprotein {Mus musculus} (exp=-1; wgp=0; cg=0), partial (5%) [THC2612900]"	hs|5p15.1
A_33_P3408624	-32.8787	NM_015232	NM_015232	IQSEC3	"Homo sapiens IQ motif and Sec7 domain 3 (IQSEC3), transcript variant 2, mRNA [NM_015232]"	hs|12p13.33
A_23_P9496	-10.7491	NM_014564	NM_014564	LHX3	"Homo sapiens LIM homeobox 3 (LHX3), transcript variant 2, mRNA [NM_014564]"	hs|9q34.3
A_33_P3221203	-5.62699	NM_002427	NM_002427	MMP13	"Homo sapiens matrix metallopeptidase 13 (collagenase 3) (MMP13), mRNA [NM_002427]"	hs|11q22.2
A_21_P0013942	-5.04518	XM_002343196	XM_002343196	LOC100130830	"PREDICTED: Homo sapiens hypothetical protein LOC100130830 (LOC100130830), mRNA [XM_002343196]"	hs|12q11
A_21_P0008682	-5.43199	DB323163	DB323163	XLOC_011367	"DB323163 NT2NE2 Homo sapiens cDNA clone NT2NE2011878 3', mRNA sequence [DB323163]"	hs|15q26.2
A_24_P236753	-15.7042	NM_003585	NM_003585	DOC2B	"Homo sapiens double C2-like domains, beta (DOC2B), mRNA [NM_003585]"	hs|17p13.3
A_24_P933908	-19.3407	BC011595	BC011595	GPNMB	"Homo sapiens glycoprotein (transmembrane) nmb, mRNA (cDNA clone IMAGE:3345861), complete cds. [BC011595]"	hs|7p15.3
A_33_P3364826	-5.90834	ENST00000239715	AK001238	ARMC4	armadillo repeat containing 4 [Source:HGNC Symbol;Acc:25583] [ENST00000239715]	hs|10p12.1
A_21_P0009658	-10.2698	NR_038334	NR_038334	LOC100505715	"Homo sapiens uncharacterized LOC100505715 (LOC100505715), non-coding RNA [NR_038334]"	hs|19q13.31
A_33_P3402694	-3.18407	NM_014980	NM_014980	STXBP5L	"Homo sapiens syntaxin binding protein 5-like (STXBP5L), mRNA [NM_014980]"	hs|3q13.33
A_33_P3383556	-4.74215	NM_174975	NM_174975	SEC14L3	"Homo sapiens SEC14-like 3 (S. cerevisiae) (SEC14L3), mRNA [NM_174975]"	hs|22q12.2
A_21_P0002022	-48.2724	ENST00000412381	CD671604	XLOC_001999	"fg05g09.y1 Human Iris cDNA (Normalized): fg Homo sapiens cDNA clone fg05g09 5', mRNA sequence [CD671604]"	hs|2p24.3
A_21_P0011734	-13.6502	XR_109588	XR_109588	LOC100505851	"PREDICTED: Homo sapiens hypothetical LOC100505851 (LOC100505851), miscRNA [XR_109588]"	hs|19p12
A_23_P259344	-15.1229	NM_031890	NM_031890	CECR6	"Homo sapiens cat eye syndrome chromosome region, candidate 6 (CECR6), transcript variant 1, mRNA [NM_031890]"	hs|22q11.1
A_21_P0007478	-2.02645	NR_026948	NR_026948	LOC283332	"Homo sapiens uncharacterized LOC283332 (LOC283332), non-coding RNA [NR_026948]"	hs|12q13.12
A_23_P313981	-5.83483	NM_005024	NM_005024	SERPINB10	"Homo sapiens serpin peptidase inhibitor, clade B (ovalbumin), member 10 (SERPINB10), mRNA [NM_005024]"	hs|18q22.1
A_21_P0005610	-6.79272	TCONS_00014415		XLOC_006582	"BROAD Institute lincRNA (XLOC_006582), lincRNA [TCONS_00014415]"	hs|7q31.31
A_21_P0014663	-4.15943	NM_183238	NM_183238	ZNF605	"Homo sapiens zinc finger protein 605 (ZNF605), transcript variant 1, mRNA [NM_183238]"	hs|12q24.33
A_33_P3250209	-3.15548	NM_207371	NM_207371	C10orf140	"Homo sapiens chromosome 10 open reading frame 140 (C10orf140), mRNA [NM_207371]"	hs|10p12.31
A_21_P0004268	-7.65247	TCONS_00010003		XLOC_004439	"BROAD Institute lincRNA (XLOC_004439), lincRNA [TCONS_00010003]"	hs|5q14.1
A_33_P3291594	-2.07713	ENST00000370131	M19301	DBT	dihydrolipoamide branched chain transacylase E2 [Source:HGNC Symbol;Acc:2698] [ENST00000370131]	hs|1p21.2
A_33_P3250566	-7.19941	ENST00000390443	D13070		T cell receptor alpha variable 8-6 [Source:HGNC Symbol;Acc:12151] [ENST00000390443]	hs|14q11.2
A_32_P401091	-7.69738	NM_004825	NM_004825	CDY2A	"Homo sapiens chromodomain protein, Y-linked, 2A (CDY2A), mRNA [NM_004825]"	hs|Yq11.222
A_21_P0009893	-15.0628	ENST00000457224	AA310927	XLOC_013698	"EST181906 Jurkat T-cells V Homo sapiens cDNA 5' end, mRNA sequence [AA310927]"	hs|20p11.21
A_21_P0003510	-2.12158	ENST00000506412	BF239155	XLOC_004085	"601905553F1 NIH_MGC_54 Homo sapiens cDNA clone IMAGE:4133461 5', mRNA sequence [BF239155]"	hs|4q28.3
A_23_P216812	-2.34987	NM_004936	NM_004936	CDKN2B	"Homo sapiens cyclin-dependent kinase inhibitor 2B (p15, inhibits CDK4) (CDKN2B), transcript variant 1, mRNA [NM_004936]"	hs|9p21.3
A_33_P3350988	-2.56552	NR_033996	NR_033996	LOC388942	"Homo sapiens uncharacterized LOC388942 (LOC388942), non-coding RNA [NR_033996]"	hs|2p21
A_21_P0002605	-8.9733	DB227855	DB227855	XLOC_001616	"DB227855 TRACH3 Homo sapiens cDNA clone TRACH3020480 5', mRNA sequence [DB227855]"	hs|2q12.2
A_21_P0000844	-6.56525	NR_038932	NR_038932	LOC100505583	"Homo sapiens uncharacterized LOC100505583 (LOC100505583), non-coding RNA [NR_038932]"	hs|10p11.22
A_24_P314515	-25.2219	NR_024345	NR_024345	HNF1A-AS1	"Homo sapiens HNF1A antisense RNA 1 (non-protein coding) (HNF1A-AS1), non-coding RNA [NR_024345]"	hs|12q24.31
A_21_P0014751	-7.68009	XR_132487	XR_132487	LOC100652785	"PREDICTED: Homo sapiens hypothetical LOC100652785 (LOC100652785), miscRNA [XR_132487]"	hs|2p24.3
A_23_P136246	-34.012	NM_130902	NM_130902	COX7B2	"Homo sapiens cytochrome c oxidase subunit VIIb2 (COX7B2), mRNA [NM_130902]"	hs|4p12
A_21_P0012306	-5.69537	AK226145	AK226145	psiTPTE22	"DB340689 TESTI4 Homo sapiens cDNA clone TESTI4023425 3', mRNA sequence [DB340689]"	hs|22q11.1
A_33_P3253852	-10.1453	AK128083	AK128083	LOC100129240	"Homo sapiens cDNA FLJ46204 fis, clone TESTI4009501. [AK128083]"	hs|4q35.1
A_24_P314681	-3.02836	ENST00000446589	BX281397		"BX281397 Soares_NFL_T_GBC_S1 Homo sapiens cDNA clone IMAGp998G075145 ; IMAGE:2087454, mRNA sequence [BX281397]"	hs|10q26.3
A_21_P0014449	-20.3742	XR_109854	XR_109854	LOC100506532	"PREDICTED: Homo sapiens hypothetical LOC100506532 (LOC100506532), miscRNA [XR_109854]"	hs|9q34.3
A_23_P119042	-2.72024	NM_005601	NM_005601	NKG7	"Homo sapiens natural killer cell group 7 sequence (NKG7), mRNA [NM_005601]"	hs|19q13.41
A_24_P275199	-75.7997	NM_001112741	NM_001112741	KCNC1	"Homo sapiens potassium voltage-gated channel, Shaw-related subfamily, member 1 (KCNC1), transcript variant A, mRNA [NM_001112741]"	hs|11p15.1
A_33_P3357738	-13.0994	BC021736	BC021736	LOC728196	Homo sapiens cDNA clone IMAGE:4820483. [BC021736]	hs|11q23.1
A_24_P29401	-2.77736	NM_181523	NM_181523	PIK3R1	"Homo sapiens phosphoinositide-3-kinase, regulatory subunit 1 (alpha) (PIK3R1), transcript variant 1, mRNA [NM_181523]"	hs|5q13.1
A_33_P3375869	-2.57748	AK124198	AK124198	LOC100128950	"Homo sapiens cDNA FLJ42204 fis, clone THYMU2035400. [AK124198]"	hs|3q29
A_23_P383325	-6.41366	NM_152775	NM_152775	CCDC110	"Homo sapiens coiled-coil domain containing 110 (CCDC110), transcript variant 1, mRNA [NM_152775]"	hs|4q35.1
A_23_P53057	-12.9707	NM_013250	NM_013250	ZNF215	"Homo sapiens zinc finger protein 215 (ZNF215), mRNA [NM_013250]"	hs|11p15.4
A_33_P3265301	-2.12941	NM_152219	NM_152219	GJD3	"Homo sapiens gap junction protein, delta 3, 31.9kDa (GJD3), mRNA [NM_152219]"	hs|17q21.2
A_21_P0003445	-5.37045	XR_108536	XR_108536	LOC100507150	"PREDICTED: Homo sapiens hypothetical LOC100507150 (LOC100507150), miscRNA [XR_108536]"	hs|4p16.3
A_24_P257336	-24.3589	NM_022135	NM_022135	POPDC2	"Homo sapiens popeye domain containing 2 (POPDC2), mRNA [NM_022135]"	hs|3q13.33
A_33_P3273424	-2.35352	ENST00000490291		RETSAT	"retinol saturase (all-trans-retinol 13,14-reductase) [Source:HGNC Symbol;Acc:25991] [ENST00000490291]"	hs|2p11.2
A_23_P420209	-2.36654	NM_004751	NM_004751	GCNT3	"Homo sapiens glucosaminyl (N-acetyl) transferase 3, mucin type (GCNT3), mRNA [NM_004751]"	hs|15q22.2
A_33_P3394312	-21.8006	NM_001005480	NM_001005480	OR2A2	"Homo sapiens olfactory receptor, family 2, subfamily A, member 2 (OR2A2), mRNA [NM_001005480]"	hs|7q35
A_21_P0014667	-34.1149	XR_111050	XR_111050	LOC100509635	"PREDICTED: Homo sapiens hypothetical LOC100509635 (LOC100509635), miscRNA [XR_111050]"	hs|10p12.31
A_33_P3380793	-5.27923	NR_026997	NR_026997	C22orf34	"Homo sapiens chromosome 22 open reading frame 34 (C22orf34), non-coding RNA [NR_026997]"	hs|22q13.33
A_23_P29394	-7.10631	NM_032279	NM_032279	ATP13A4	"Homo sapiens ATPase type 13A4 (ATP13A4), mRNA [NM_032279]"	hs|3q29
A_24_P63347	-15.4549	NM_002620	NM_002620	PF4V1	"Homo sapiens platelet factor 4 variant 1 (PF4V1), mRNA [NM_002620]"	hs|4q13.3
A_23_P129458	-3.26617	NM_145168	NM_145168	SDR42E1	"Homo sapiens short chain dehydrogenase/reductase family 42E, member 1 (SDR42E1), mRNA [NM_145168]"	hs|16q23.3
A_32_P41604	-5.30728	NM_000130	NM_000130	F5	"Homo sapiens coagulation factor V (proaccelerin, labile factor) (F5), mRNA [NM_000130]"	hs|1q24.2
A_23_P431179	-3.13697	NM_003538	NM_003538	HIST1H4A	"Homo sapiens histone cluster 1, H4a (HIST1H4A), mRNA [NM_003538]"	hs|6p22.2
A_23_P329353	-3.58517	NM_015463	NM_015463	CNRIP1	"Homo sapiens cannabinoid receptor interacting protein 1 (CNRIP1), transcript variant CRIP1a, mRNA [NM_015463]"	hs|2p14
A_23_P56559	-8.30633	NM_005771	NM_005771	DHRS9	"Homo sapiens dehydrogenase/reductase (SDR family) member 9 (DHRS9), transcript variant 1, mRNA [NM_005771]"	hs|2q31.1
A_21_P0011229	-9.08006	XR_132731	XR_132731	LINC00371	"PREDICTED: Homo sapiens hypothetical LOC647166 (LOC647166), miscRNA [XR_132731]"	hs|13q14.3
A_21_P0006049	-3.83768	ENST00000454204	BX103380	XLOC_007545	"BX103380 Soares_NFL_T_GBC_S1 Homo sapiens cDNA clone IMAGp998M113958, mRNA sequence [BX103380]"	hs|9q33.2
A_33_P3413759	-5.41615	NM_001010887	NM_001010887	ACER2	"Homo sapiens alkaline ceramidase 2 (ACER2), mRNA [NM_001010887]"	hs|9p22.1
A_21_P0007184	-8.61194	TCONS_00019252		XLOC_009084	"BROAD Institute lincRNA (XLOC_009084), lincRNA [TCONS_00019252]"	hs|11p15.1
A_33_P3288995	-2.34755	ENST00000396653		AP1S3	"adaptor-related protein complex 1, sigma 3 subunit [Source:HGNC Symbol;Acc:18971] [ENST00000396653]"	hs|2q36.1
A_24_P185186	-2.81697	NM_174920	NM_174920	SAMD14	"Homo sapiens sterile alpha motif domain containing 14 (SAMD14), mRNA [NM_174920]"	hs|17q21.33
A_33_P3241786	-5.82491	NM_017482	NM_017482	ADD2	"Homo sapiens adducin 2 (beta) (ADD2), transcript variant 2, mRNA [NM_017482]"	hs|2p13.3
A_21_P0004059	-3.99236	ENST00000507428	DB032982	XLOC_004539	"DB032982 TESTI2 Homo sapiens cDNA clone TESTI2017615 5', mRNA sequence [DB032982]"	hs|5q23.2
A_23_P44942	-5.01939	NM_025004	NM_025004	CCDC15	"Homo sapiens coiled-coil domain containing 15 (CCDC15), mRNA [NM_025004]"	hs|11q24.2
A_33_P3217609	-2.40112	ENST00000380995	AK125705	TBC1D22A	"TBC1 domain family, member 22A [Source:HGNC Symbol;Acc:1309] [ENST00000380995]"	hs|22q13.31
A_21_P0009634	-2.04923	BG202001	BG202001	XLOC_012870	"RST21348 Athersys RAGE Library Homo sapiens cDNA, mRNA sequence [BG202001]"	hs|18q22.2
A_33_P3417640	-2.78274	NM_022046	NM_022046	KLK14	"Homo sapiens kallikrein-related peptidase 14 (KLK14), mRNA [NM_022046]"	hs|19q13.41
A_23_P414352	-50.256	NR_027379	NR_027379	C1orf180	"Homo sapiens chromosome 1 open reading frame 180 (C1orf180), non-coding RNA [NR_027379]"	hs|1p22.3
A_33_P3250333	-3.9245	NM_207437	NM_207437	DNAH10	"Homo sapiens dynein, axonemal, heavy chain 10 (DNAH10), mRNA [NM_207437]"	hs|12q24.31
A_33_P3370511	-2.41939	AK128128	AK128128	LOC100128348	"Homo sapiens cDNA FLJ46249 fis, clone TESTI4021377. [AK128128]"	hs|16p11.2
A_21_P0006804	-6.23645	ENST00000439421	R37935	XLOC_008996	"yc99a04.s1 Soares infant brain 1NIB Homo sapiens cDNA clone IMAGE:24029 3', mRNA sequence [R37935]"	hs|10q26.3
A_33_P3386965	-2.05193	NM_145167	NM_145167	PIGM	"Homo sapiens phosphatidylinositol glycan anchor biosynthesis, class M (PIGM), mRNA [NM_145167]"	hs|1q23.2
A_23_P47484	-6.51039	NM_145016	NM_145016	GLYATL2	"Homo sapiens glycine-N-acyltransferase-like 2 (GLYATL2), mRNA [NM_145016]"	hs|11q12.1
A_21_P0010972	-27.7513	XR_109044	XR_109044	LOC100507261	"PREDICTED: Homo sapiens hypothetical LOC100507261 (LOC100507261), miscRNA [XR_109044]"	hs|11p11.2
A_23_P378926	-2.1192	NM_000682	NM_000682	ADRA2B	"Homo sapiens adrenergic, alpha-2B-, receptor (ADRA2B), mRNA [NM_000682]"	hs|2q11.1
A_21_P0000845	-2.47277	AK093279	AK093279	MIPEPP3	"Q96G65_HUMAN (Q96G65) Mitochondrial intermediate peptidase, partial (12%) [THC2611459]"	hs|13q12.11
A_21_P0004552	-3.61714	NR_033898	NR_033898	LOC285577	"Homo sapiens uncharacterized LOC285577 (LOC285577), non-coding RNA [NR_033898]"	hs|5p15.33
A_33_P3246513	-6.16185	NM_001362	NM_001362	DIO3	"Homo sapiens deiodinase, iodothyronine, type III (DIO3), mRNA [NM_001362]"	hs|14q32.31
A_23_P135226	-5.89477	NM_001004457	NM_001004457	OR1N2	"Homo sapiens olfactory receptor, family 1, subfamily N, member 2 (OR1N2), mRNA [NM_001004457]"	hs|9q33.2
A_24_P181254	-16.296	NM_006418	NM_006418	OLFM4	"Homo sapiens olfactomedin 4 (OLFM4), mRNA [NM_006418]"	hs|13q14.3
A_33_P3308586	-24.7281	NM_001012729	NM_001012729	DUXA	"Homo sapiens double homeobox A (DUXA), mRNA [NM_001012729]"	hs|19q13.43
A_33_P3323074	-2.04763	NM_020133	NM_020133	AGPAT4	"Homo sapiens 1-acylglycerol-3-phosphate O-acyltransferase 4 (lysophosphatidic acid acyltransferase, delta) (AGPAT4), mRNA [NM_020133]"	hs|6q26
A_21_P0000521	-3.45983	NR_027097	NR_027097	LOC100271832	"Homo sapiens uncharacterized LOC100271832 (LOC100271832), non-coding RNA [NR_027097]"	hs|2p22.3
A_33_P3323136	-2.0388	NM_145010	NM_145010	ENKUR	"Homo sapiens enkurin, TRPC channel interacting protein (ENKUR), mRNA [NM_145010]"	hs|10p12.1
A_21_P0005339	-18.3166	ENST00000446340	DB048756	XLOC_006652	"DB048756 TESTI2 Homo sapiens cDNA clone TESTI2037874 5', mRNA sequence [DB048756]"	hs|7q36.1
A_33_P3417113	-6.34065	NM_207173	NM_207173	NPSR1	"Homo sapiens neuropeptide S receptor 1 (NPSR1), transcript variant 2, mRNA [NM_207173]"	hs|7p14.3
A_21_P0011565	-4.81653	ENST00000477499	XR_108271	XLOC_l2_005936	"PREDICTED: Homo sapiens hypothetical LOC100506371 (LOC100506371), miscRNA [XR_108271]"	hs|17p13.3
A_21_P0014787	-5.92701	XR_132571	XR_132571	LOC100652968	"PREDICTED: Homo sapiens hypothetical LOC100652968, transcript variant 2 (LOC100652968), miscRNA [XR_132571]"	hs|10p11.22
A_33_P3382835	-8.84323	NM_025081	NM_025081	NYNRIN	"Homo sapiens NYN domain and retroviral integrase containing (NYNRIN), mRNA [NM_025081]"	hs|14q12
A_33_P3307820	-2.62479	NM_001013623	NM_001013623	C6orf94	"Homo sapiens chromosome 6 open reading frame 94 (C6orf94), mRNA [NM_001013623]"	hs|6q24.2
A_19_P00322349	-4.32591	ENST00000511431		Q20ZE8	"Q20ZE8_RHOPA (Q20ZE8) Ribosomal protein S21, partial (10%) [THC2682395]"	hs|4p15.31
A_21_P0003829	-2.0665	ENST00000510420	BX099393	XLOC_003495	"BX099393 Soares_testis_NHT Homo sapiens cDNA clone IMAGp998M042576, mRNA sequence [BX099393]"	hs|4p15.1
A_21_P0012061	-3.59816	ENST00000450551	CD527082	XLOC_l2_007933	"YEA68 Homo sapiens adult testis cDNA library Homo sapiens cDNA, mRNA sequence [CD527082]"	hs|2p24.1
A_33_P3556839	-12.6557	BC043531	BC043531	LOC338694	"Homo sapiens hypothetical protein LOC338694, mRNA (cDNA clone IMAGE:5168969), partial cds. [BC043531]"	hs|11q13.3
A_21_P0004113	-3.44692	ENST00000505040	CX757022	XLOC_004758	"AGENCOURT_40972357 NIH_MGC_278 Homo sapiens cDNA clone IMAGE:7770133 3', mRNA sequence [CX757022]"	hs|5p14.1
A_21_P0000641	-2.24444	NR_034125	NR_034125	LOC387723	"Homo sapiens uncharacterized LOC387723 (LOC387723), non-coding RNA [NR_034125]"	hs|10q26.3
A_21_P0012838	-11.2143	TCONS_l2_00022449		XLOC_l2_011692	"BROAD Institute lincRNA (XLOC_l2_011692), lincRNA [TCONS_l2_00022449]"	hs|5q21.1
A_33_P3279353	-2.10613	NM_001700	NM_001700	AZU1	"Homo sapiens azurocidin 1 (AZU1), mRNA [NM_001700]"	hs|19p13.3
A_33_P3227452	-2.93623	AF204269	AF204269		"Homo sapiens pRbBP-39 mRNA, complete cds. [AF204269]"	hs|16p13.3
A_33_P3250857	-5.62997	ENST00000474863	BC043142	AIDA	"axin interactor, dorsalization associated [Source:HGNC Symbol;Acc:25761] [ENST00000474863]"	hs|1q41
A_33_P3216651	-16.7784	NM_001145308	NM_001145308	LRTOMT	"Homo sapiens leucine rich transmembrane and 0-methyltransferase domain containing (LRTOMT), transcript variant 4, mRNA [NM_001145308]"	hs|11q13.4
A_23_P349343	-7.49752	NM_139163	NM_139163	ALS2CR12	"Homo sapiens amyotrophic lateral sclerosis 2 (juvenile) chromosome region, candidate 12 (ALS2CR12), transcript variant 1, mRNA [NM_139163]"	hs|2q33.1
A_24_P390909	-4.60553	NM_181882	NM_181882	PRX	"Homo sapiens periaxin (PRX), transcript variant 2, mRNA [NM_181882]"	hs|19q13.2
A_21_P0002130	-5.66842	ENST00000422899	BG198713	XLOC_002448	"RST17982 Athersys RAGE Library Homo sapiens cDNA, mRNA sequence [BG198713]"	hs|2q33.1
A_33_P3236077	-3.65807	NM_001079827	NM_001079827	CLRN2	"Homo sapiens clarin 2 (CLRN2), mRNA [NM_001079827]"	hs|4p15.32
A_23_P257815	-10.5822	NM_005582	NM_005582	CD180	"Homo sapiens CD180 molecule (CD180), mRNA [NM_005582]"	hs|5q12.3
A_21_P0000797	-5.65002	NR_038426	NR_038426	LOC100506795	"Homo sapiens uncharacterized LOC100506795 (LOC100506795), non-coding RNA [NR_038426]"	hs|1q42.2
A_21_P0013114	-2.70658	AK125910	AK125910	LPAL2	"BROAD Institute lincRNA (XLOC_l2_013192), lincRNA [TCONS_l2_00025015]"	hs|6q25.3
A_24_P463891	-13.7978	NM_006581	NM_006581	FUT9	"Homo sapiens fucosyltransferase 9 (alpha (1,3) fucosyltransferase) (FUT9), mRNA [NM_006581]"	hs|6q16.1
A_23_P62999	-2.94812	NM_004455	NM_004455	EXTL1	"Homo sapiens exostoses (multiple)-like 1 (EXTL1), mRNA [NM_004455]"	hs|1p36.11
A_21_P0009984	-2.25474	AK128288	AK128288	LOC284757	"BROAD Institute lincRNA (XLOC_013591), lincRNA [TCONS_00028249]"	hs|20q13.33
A_24_P25544	-11.6543	NM_000514	NM_000514	GDNF	"Homo sapiens glial cell derived neurotrophic factor (GDNF), transcript variant 1, mRNA [NM_000514]"	hs|5p13.2
A_19_P00315725	-10.5182	THC2716877		Q8VGA8	"Q8VGA8_MOUSE (Q8VGA8) Olfactory receptor MOR174-1, partial (5%) [THC2716877]"	hs|6q21
A_32_P64200	-3.78072	NM_002098	NM_002098	GUCA1B	"Homo sapiens guanylate cyclase activator 1B (retina) (GUCA1B), mRNA [NM_002098]"	hs|6p21.1
A_33_P3264974	-9.61318	ENST00000382007	AK127623		"Homo sapiens cDNA FLJ45721 fis, clone HCASM2007773. [AK127623]"	hs|4p15.2
A_23_P411851	-2.03714	NM_152592	NM_152592	C14orf49	"Homo sapiens chromosome 14 open reading frame 49 (C14orf49), mRNA [NM_152592]"	hs|14q32.13
A_33_P3350179	-21.6432	N95477	N95477		"zb81h09.s1 Soares_senescent_fibroblasts_NbHSF Homo sapiens cDNA clone IMAGE:310049 3' similar to contains element MER22 repetitive element ;, mRNA sequence [N95477]"	hs|17p12
A_33_P3293469	-3.31251	XM_001721678	XM_001721678	LOC100128105	"PREDICTED: Homo sapiens hypothetical protein LOC100128105 (LOC100128105), mRNA [XM_001721678]"	hs|17q25.3
A_33_P3238785	-4.2187	NR_024499	NR_024499	FMR1-AS1	"Homo sapiens FMR1 antisense RNA 1 (non-protein coding) (FMR1-AS1), transcript variant 1, non-coding RNA [NR_024499]"	hs|Xq27.3
A_24_P657226	-8.19194	NM_139173	NM_139173	SLC9B1	"Homo sapiens solute carrier family 9, subfamily B (cation proton antiporter 2), member 1 (SLC9B1), nuclear gene encoding mitochondrial protein, transcript variant 1, mRNA [NM_139173]"	hs|4q24
A_21_P0010409	-3.31258	ENST00000413244	DA259417	XLOC_014198	"DA259417 BRCAN2 Homo sapiens cDNA clone BRCAN2011163 5', mRNA sequence [DA259417]"	hs|22q12.1
A_21_P0008458	-2.13301	ENST00000554634		XLOC_011064	"ALU8_HUMAN (P39195) Alu subfamily SX sequence contamination warning entry, partial (8%) [THC2755781]"	hs|14q24.2
A_23_P83200	-2.90448	NM_152572	NM_152572	AK8	"Homo sapiens adenylate kinase 8 (AK8), mRNA [NM_152572]"	hs|9q34.13
A_33_P3306802	-2.88095	AY358791	AY358791	LOC100130916	"Homo sapiens clone DNA131652 HSAL5836 (UNQ5836) mRNA, complete cds. [AY358791]"	hs|9q22.33
A_33_P3293202	-2.1906	NM_177965	NM_177965	C8orf37	"Homo sapiens chromosome 8 open reading frame 37 (C8orf37), mRNA [NM_177965]"	hs|8q22.1
A_33_P3279654	-2.80648	NM_173651	NM_173651	FSIP2	"Homo sapiens fibrous sheath interacting protein 2 (FSIP2), mRNA [NM_173651]"	hs|2q32.1
A_21_P0014022	-10.1675	XM_003403500	XM_003403500	RBSG2	"PREDICTED: Homo sapiens hypothetical protein LOC100652835 (LOC100652835), mRNA [XM_003403500]"	hs|9q34.3
A_24_P28811	-4.21689	NR_023391	NR_023391	CYP4F30P	"Homo sapiens cytochrome P450, family 4, subfamily F, polypeptide 30, pseudogene (CYP4F30P), non-coding RNA [NR_023391]"	hs|2q21.1
A_24_P666105	-3.93138	NM_001134745	NM_001134745	LRRTM4	"Homo sapiens leucine rich repeat transmembrane neuronal 4 (LRRTM4), transcript variant 1, mRNA [NM_001134745]"	hs|2p12
A_23_P81018	-2.38575	NM_005390	NM_005390	PDHA2	"Homo sapiens pyruvate dehydrogenase (lipoamide) alpha 2 (PDHA2), mRNA [NM_005390]"	hs|4q22.3
A_33_P3272748	-2.52361	NM_001012975	NM_001012975	RNASE10	"Homo sapiens ribonuclease, RNase A family, 10 (non-active) (RNASE10), mRNA [NM_001012975]"	hs|14q11.2
A_24_P10444	-14.2906	NM_173623	NM_173623	TTLL6	"Homo sapiens tubulin tyrosine ligase-like family, member 6 (TTLL6), transcript variant 2, mRNA [NM_173623]"	hs|17q21.32
A_23_P387537	-2.83556	NM_024082	NM_024082	PRRG3	"Homo sapiens proline rich Gla (G-carboxyglutamic acid) 3 (transmembrane) (PRRG3), transcript variant 1, mRNA [NM_024082]"	hs|Xq28
A_33_P3262171	-5.83869	NM_001039112	NM_001039112	FER1L6	"Homo sapiens fer-1-like 6 (C. elegans) (FER1L6), mRNA [NM_001039112]"	hs|8q24.13
A_33_P3221418	-29.485	NM_001113228	NM_001113228	NTNG1	"Homo sapiens netrin G1 (NTNG1), transcript variant 2, mRNA [NM_001113228]"	hs|1p13.3
A_33_P3226407	-3.32444	XR_132886	XR_132886	LOC729732	"PREDICTED: Homo sapiens hypothetical LOC729732 (LOC729732), miscRNA [XR_132886]"	hs|8p23.1
A_24_P277657	-2.08064	NM_006877	NM_006877	GMPR	"Homo sapiens guanosine monophosphate reductase (GMPR), mRNA [NM_006877]"	hs|6p22.3
A_21_P0012890	-28.0614	NR_033906	NR_033906	LOC442132	"Homo sapiens golgin A6 family-like 1 pseudogene (LOC442132), non-coding RNA [NR_033906]"	hs|5p15.31
A_33_P3314500	-3.71853	NM_005961	NM_005961	MUC6	"Homo sapiens mucin 6, oligomeric mucus/gel-forming (MUC6), mRNA [NM_005961]"	hs|11p15.5
A_19_P00321556	-2.21042	BC040858	BC040858	Q88AI3	"Q88AI3_PSESM (Q88AI3) Drug resistance transporter, EmrB/QacA family, partial (4%) [THC2611420]"	hs|Xp11.3
A_21_P0010671	-7.73387	NR_038845	NR_038845	LOC643723	"Homo sapiens uncharacterized LOC643723 (LOC643723), non-coding RNA [NR_038845]"	hs|1q41
A_33_P3302662	-2.31647	ENST00000461758		TLE4	"transducin-like enhancer of split 4 (E(sp1) homolog, Drosophila) [Source:HGNC Symbol;Acc:11840] [ENST00000461758]"	hs|9q21.31
A_33_P3224190	-2.89078	NM_001040661	NM_001040661	SLC29A4	"Homo sapiens solute carrier family 29 (nucleoside transporters), member 4 (SLC29A4), transcript variant 1, mRNA [NM_001040661]"	hs|7p22.1
A_33_P3419012	-4.33899	ENST00000398304		DLG2	"discs, large homolog 2 (Drosophila) [Source:HGNC Symbol;Acc:2901] [ENST00000398304]"	hs|11q14.1
A_21_P0013605	-30.0399	XM_001715154	XM_001715154	HMCN2	"PREDICTED: Homo sapiens hemicentin 2 (HMCN2), mRNA [XM_001715154]"	hs|9q34.11
A_33_P3255304	-12.8793	NM_001099781	NM_001099781	GGT5	"Homo sapiens gamma-glutamyltransferase 5 (GGT5), transcript variant 1, mRNA [NM_001099781]"	hs|22q11.23
A_19_P00317704	-22.7737	XR_109941	XR_109941	LOC100507006	"PREDICTED: Homo sapiens hypothetical LOC100507006 (LOC100507006), miscRNA [XR_109941]"	hs|2p14
A_33_P3494979	-8.40887	BX648662	BX648662	DKFZp686F0839	Homo sapiens mRNA; cDNA DKFZp686F0839 (from clone DKFZp686F0839). [BX648662]	hs|12q23.3
A_33_P3216746	-7.02344	NM_015236	NM_015236	LPHN3	"Homo sapiens latrophilin 3 (LPHN3), mRNA [NM_015236]"	hs|4q13.1
A_33_P3293763	-3.92756	NM_198689	NM_198689	KRTAP10-7	"Homo sapiens keratin associated protein 10-7 (KRTAP10-7), mRNA [NM_198689]"	hs|21q22.3
A_32_P214284	-3.3087	XM_003119920	XM_003119920	LOC100129516	"PREDICTED: Homo sapiens hypothetical protein LOC100129516 (LOC100129516), mRNA [XM_003119920]"	hs|3q29
A_33_P3213179	-13.4023	NM_002711	NM_002711	PPP1R3A	"Homo sapiens protein phosphatase 1, regulatory subunit 3A (PPP1R3A), mRNA [NM_002711]"	hs|7q31.1
A_33_P3366195	-3.7083	NM_014862	NM_014862	ARNT2	"Homo sapiens aryl-hydrocarbon receptor nuclear translocator 2 (ARNT2), mRNA [NM_014862]"	hs|15q25.1
A_21_P0014779	-7.65604	ENST00000494753	XR_132558	PLIN2	"PREDICTED: Homo sapiens hypothetical LOC100509484 (LOC100509484), miscRNA [XR_132558]"	hs|9p22.1
A_24_P344666	-30.6842	NM_020341	NM_020341	PAK7	"Homo sapiens p21 protein (Cdc42/Rac)-activated kinase 7 (PAK7), transcript variant 1, mRNA [NM_020341]"	hs|20p12.2
A_33_P3295348	-3.44888	NM_001130711	NM_001130711	CLEC2A	"Homo sapiens C-type lectin domain family 2, member A (CLEC2A), mRNA [NM_001130711]"	hs|12p13.31
A_21_P0013282	-6.40977	BX103949	BX103949	XLOC_l2_013730	"BX103949 NCI_CGAP_Co3 Homo sapiens cDNA clone IMAGp998C112296, mRNA sequence [BX103949]"	hs|7p21.1
A_23_P90944	-6.35864	NM_002976	NM_002976	SCN7A	"Homo sapiens sodium channel, voltage-gated, type VII, alpha (SCN7A), mRNA [NM_002976]"	hs|2q24.3
A_23_P60210	-23.6779	NM_006911	NM_006911	RLN1	"Homo sapiens relaxin 1 (RLN1), mRNA [NM_006911]"	hs|9p24.1
A_32_P51237	-3.39994	NM_181712	NM_181712	KANK4	"Homo sapiens KN motif and ankyrin repeat domains 4 (KANK4), mRNA [NM_181712]"	hs|1p31.3
A_23_P427747	-17.9941	NM_138804	NM_138804	C2orf65	"Homo sapiens chromosome 2 open reading frame 65 (C2orf65), mRNA [NM_138804]"	hs|2p13.1
A_21_P0009781	-9.28249	GU357550	GU357550	XLOC_012981	"Q2VCE5_HUMAN (Q2VCE5) UCA1 protein, partial (98%) [THC2492330]"	hs|19p13.12
A_21_P0009143	-14.9516	BC041439	BC041439	XLOC_012048	"AGENCOURT_7906098 NIH_MGC_82 Homo sapiens cDNA clone IMAGE:6104875 5', mRNA sequence [BQ435567]"
A_23_P406591	-28.5813	NR_003675	NR_003675	GUSBP5	"Homo sapiens glucuronidase, beta pseudogene 5 (GUSBP5), non-coding RNA [NR_003675]"	hs|4q31.21
A_23_P13479	-6.37721	NM_001004725	NM_001004725	OR4S1	"Homo sapiens olfactory receptor, family 4, subfamily S, member 1 (OR4S1), mRNA [NM_001004725]"	hs|11p11.2
A_33_P3249589	-6.94436	NM_022893	NM_022893	BCL11A	"Homo sapiens B-cell CLL/lymphoma 11A (zinc finger protein) (BCL11A), transcript variant 1, mRNA [NM_022893]"	hs|2p16.1
A_33_P3385837	-2.58513	NM_024688	NM_024688	C10orf68	"Homo sapiens chromosome 10 open reading frame 68 (C10orf68), mRNA [NM_024688]"	hs|10p11.22
A_33_P3238493	-2.92341	NM_014974	NM_014974	DIP2C	"Homo sapiens DIP2 disco-interacting protein 2 homolog C (Drosophila) (DIP2C), mRNA [NM_014974]"	hs|10p15.3
A_23_P4443	-3.33913	NM_018488	NM_018488	TBX4	"Homo sapiens T-box 4 (TBX4), mRNA [NM_018488]"	hs|17q23.2
A_24_P125335	-2.32338	NM_005408	NM_005408	CCL13	"Homo sapiens chemokine (C-C motif) ligand 13 (CCL13), mRNA [NM_005408]"	hs|17q12
A_23_P216845	-3.42184	NM_004188	NM_004188	GFI1B	"Homo sapiens growth factor independent 1B transcription repressor (GFI1B), transcript variant 1, mRNA [NM_004188]"	hs|9q34.13
A_19_P00331839	-2.07604	NR_034127	NR_034127	LOC100132356	"Homo sapiens uncharacterized LOC100132356 (LOC100132356), non-coding RNA [NR_034127]"	hs|5p12
A_24_P393611	-2.33509	NM_138736	NM_138736	GNAO1	"Homo sapiens guanine nucleotide binding protein (G protein), alpha activating activity polypeptide O (GNAO1), transcript variant 2, mRNA [NM_138736]"	hs|16q12.2
A_21_P0007913	-3.26576	ENST00000413591	CR592782	XLOC_010553	full-length cDNA clone CS0DJ012YL19 of T cells (Jurkat cell line) Cot 10-normalized of Homo sapiens (human) [CR592782]	hs|13q12.3
A_33_P3390367	-2.52163	NR_026995	NR_026995	LOC91149	"Homo sapiens uncharacterized LOC91149 (LOC91149), non-coding RNA [NR_026995]"	hs|2q31.1
A_21_P0010364	-4.45737	ENST00000428765	DA926453	XLOC_014257	"DA926453 SMINT2 Homo sapiens cDNA clone SMINT2013437 5', mRNA sequence [DA926453]"	hs|22q13.2
A_32_P101352	-2.31885	NM_001025265	NM_001025265	CXorf65	"Homo sapiens chromosome X open reading frame 65 (CXorf65), transcript variant 1, mRNA [NM_001025265]"	hs|Xq13.1
A_33_P3351624	-23.8073	NM_017433	NM_017433	MYO3A	"Homo sapiens myosin IIIA (MYO3A), mRNA [NM_017433]"	hs|10p12.1
A_33_P3337554	-13.663	NM_001163993	NM_001163993	ABCB5	"Homo sapiens ATP-binding cassette, sub-family B (MDR/TAP), member 5 (ABCB5), transcript variant 4, mRNA [NM_001163993]"	hs|7p21.1
A_33_P3348574	-7.27169	NM_001013358	NM_001013358	OR9G9	"Homo sapiens olfactory receptor, family 9, subfamily G, member 9 (OR9G9), mRNA [NM_001013358]"
A_23_P146198	-2.55741	NM_000780	NM_000780	CYP7A1	"Homo sapiens cytochrome P450, family 7, subfamily A, polypeptide 1 (CYP7A1), mRNA [NM_000780]"	hs|8q12.1
A_23_P416238	-10.3778	NM_139249	NM_139249	MS4A6E	"Homo sapiens membrane-spanning 4-domains, subfamily A, member 6E (MS4A6E), mRNA [NM_139249]"	hs|11q12.2
A_24_P299685	-10.2391	NM_198389	NM_198389	PDPN	"Homo sapiens podoplanin (PDPN), transcript variant 2, mRNA [NM_198389]"	hs|1p36.21
A_23_P51002	-2.56931	NM_176825	NM_176825	SULT1C2	"Homo sapiens sulfotransferase family, cytosolic, 1C, member 2 (SULT1C2), transcript variant 2, mRNA [NM_176825]"	hs|2q12.3
A_33_P3365305	-3.3303	NM_001039523	NM_001039523	CHRNA1	"Homo sapiens cholinergic receptor, nicotinic, alpha 1 (muscle) (CHRNA1), transcript variant 1, mRNA [NM_001039523]"	hs|2q31.1
A_23_P358394	-8.12753	NM_015864	NM_015864	FAM65B	"Homo sapiens family with sequence similarity 65, member B (FAM65B), transcript variant 2, mRNA [NM_015864]"	hs|6p22.3
A_33_P3261054	-2.14924	NM_144577	NM_144577	CCDC114	"Homo sapiens coiled-coil domain containing 114 (CCDC114), transcript variant 2, mRNA [NM_144577]"	hs|19q13.33
A_33_P3311046	-16.7102	NM_001004691	NM_001004691	OR2M7	"Homo sapiens olfactory receptor, family 2, subfamily M, member 7 (OR2M7), mRNA [NM_001004691]"	hs|1q44
A_24_P13083	-4.83532	NM_130783	NM_130783	TSPAN18	"Homo sapiens tetraspanin 18 (TSPAN18), mRNA [NM_130783]"	hs|11p11.2
A_33_P3215367	-5.85192	AK126800	AK126800		"Homo sapiens cDNA FLJ44850 fis, clone BRACE3051722. [AK126800]"	hs|2p14
A_33_P3256303	-2.40505	NM_001206609	NM_001206609	SELPLG	"Homo sapiens selectin P ligand (SELPLG), transcript variant 1, mRNA [NM_001206609]"	hs|12q24.11
A_19_P00320543	-2.15341	NR_033354	NR_033354	ZNF519	"Homo sapiens zinc finger protein 519 (ZNF519), transcript variant 2, non-coding RNA [NR_033354]"	hs|18p11.21
A_21_P0012305	-2.6413	AK226145	AK226145	psiTPTE22	"DB340689 TESTI4 Homo sapiens cDNA clone TESTI4023425 3', mRNA sequence [DB340689]"	hs|22q11.1
A_23_P86470	-3.8784	NM_003956	NM_003956	CH25H	"Homo sapiens cholesterol 25-hydroxylase (CH25H), mRNA [NM_003956]"	hs|10q23.31
A_33_P3304678	-6.20219	NR_015406	NR_015406	LOC149837	"Homo sapiens uncharacterized LOC149837 (LOC149837), non-coding RNA [NR_015406]"	hs|20p12.3
A_33_P3349927	-4.42125	ENST00000467220	CR627036	WDR60	WD repeat domain 60 [Source:HGNC Symbol;Acc:21862] [ENST00000467220]	hs|7q36.3
A_33_P3267532	-4.07555	NM_170736	NM_170736	KCNJ15	"Homo sapiens potassium inwardly-rectifying channel, subfamily J, member 15 (KCNJ15), transcript variant 1, mRNA [NM_170736]"	hs|21q22.13
A_33_P3240867	-3.24106	NM_002929	NM_002929	GRK1	"Homo sapiens G protein-coupled receptor kinase 1 (GRK1), mRNA [NM_002929]"	hs|13q34
A_33_P3261353	-9.13768	NR_033732	NR_033732	BCORP1	"Homo sapiens BCL6 corepressor pseudogene 1 (BCORP1), transcript variant 1, non-coding RNA [NR_033732]"	hs|Yq11.222
A_23_P83683	-7.6522	NM_014429	NM_014429	MORC1	"Homo sapiens MORC family CW-type zinc finger 1 (MORC1), mRNA [NM_014429]"	hs|3q13.13
A_23_P73632	-2.27977	NM_000475	NM_000475	NR0B1	"Homo sapiens nuclear receptor subfamily 0, group B, member 1 (NR0B1), mRNA [NM_000475]"	hs|Xp21.2
A_23_P13554	-2.69952	NM_001007027	NM_001007027	ALG8	"Homo sapiens asparagine-linked glycosylation 8, alpha-1,3-glucosyltransferase homolog (S. cerevisiae) (ALG8), transcript variant 2, mRNA [NM_001007027]"	hs|11q14.1
A_21_P0003358	-7.22562	ENST00000505575	DA101026	XLOC_003525	"DA101026 BRACE3 Homo sapiens cDNA clone BRACE3013048 5', mRNA sequence [DA101026]"	hs|4p13
A_23_P136777	-13.9455	NM_001647	NM_001647	APOD	"Homo sapiens apolipoprotein D (APOD), mRNA [NM_001647]"	hs|3q29
A_23_P367420	-3.00884	NM_003813	NM_003813	ADAM21	"Homo sapiens ADAM metallopeptidase domain 21 (ADAM21), mRNA [NM_003813]"	hs|14q24.2
A_21_P0000111	-3.75062	NM_001190765	NM_001190765	KLRF2	"Homo sapiens killer cell lectin-like receptor subfamily F, member 2 (KLRF2), mRNA [NM_001190765]"	hs|12p13.31
A_33_P3226761	-2.0023	NM_018419	NM_018419	SOX18	"Homo sapiens SRY (sex determining region Y)-box 18 (SOX18), mRNA [NM_018419]"	hs|20q13.33
A_33_P3382606	-7.58826	NM_207102	NM_207102	FBXW12	"Homo sapiens F-box and WD repeat domain containing 12 (FBXW12), transcript variant 1, mRNA [NM_207102]"	hs|3p21.31
A_33_P3367894	-13.8802	AK127022	AK127022	LOC100131657	"Homo sapiens cDNA FLJ45078 fis, clone BRAWH3027616. [AK127022]"	hs|6p21.2
A_21_P0007969	-2.03056	XR_110304	XR_110304	LINC00403	"PREDICTED: Homo sapiens hypothetical LOC100505996 (LOC100505996), miscRNA [XR_110304]"	hs|13q34
A_21_P0002679	-13.0385	CD512363	CD512363	XLOC_002368	"AGENCOURT_14358023 NIH_MGC_186 Homo sapiens cDNA clone IMAGE:30406428 5', mRNA sequence [CD512363]"	hs|2q24.2
A_19_P00319407	-2.02698	NM_024534	NM_024534	ERVMER34-1	"Homo sapiens endogenous retrovirus group MER34, member 1 (ERVMER34-1), transcript variant 1, mRNA [NM_024534]"	hs|4q12
A_33_P3248967	-2.14222	NM_022474	NM_022474	MPP5	"Homo sapiens membrane protein, palmitoylated 5 (MAGUK p55 subfamily member 5) (MPP5), mRNA [NM_022474]"	hs|14q23.3
A_23_P26117	-2.57882	NM_006715	NM_006715	MAN2C1	"Homo sapiens mannosidase, alpha, class 2C, member 1 (MAN2C1), mRNA [NM_006715]"	hs|15q24.2
A_23_P4416	-10.6133	NM_020653	NM_020653	ZNF287	"Homo sapiens zinc finger protein 287 (ZNF287), mRNA [NM_020653]"	hs|17p11.2
A_33_P3651948	-3.03248	NM_002499	NM_002499	NEO1	"Homo sapiens neogenin 1 (NEO1), transcript variant 1, mRNA [NM_002499]"	hs|15q24.1
A_23_P71649	-2.57431	NM_005592	NM_005592	MUSK	"Homo sapiens muscle, skeletal, receptor tyrosine kinase (MUSK), transcript variant 1, mRNA [NM_005592]"	hs|9q31.3
A_23_P28598	-3.0617	NM_004405	NM_004405	DLX2	"Homo sapiens distal-less homeobox 2 (DLX2), mRNA [NM_004405]"	hs|2q31.1
A_24_P921327	-3.06886	ENST00000505317	AF189251	TAPT1	transmembrane anterior posterior transformation 1 [Source:HGNC Symbol;Acc:26887] [ENST00000505317]	hs|4p15.32
A_19_P00319793	-2.81986	AF387616	AF387616	GM140	GB	hs|1q25.3
A_33_P3209615	-2.16939	NM_031960	NM_031960	KRTAP4-8	"Homo sapiens keratin associated protein 4-8 (KRTAP4-8), mRNA [NM_031960]"	hs|17q21.2
A_23_P66608	-2.64915	NM_021078	NM_021078	KAT2A	"Homo sapiens K(lysine) acetyltransferase 2A (KAT2A), mRNA [NM_021078]"	hs|17q21.2
A_33_P3351316	-2.5587	ENST00000273146	AK091001	FAM198A	"family with sequence similarity 198, member A [Source:HGNC Symbol;Acc:24485] [ENST00000273146]"	hs|3p22.1
A_23_P343935	-2.75049	NM_022051	NM_022051	EGLN1	"Homo sapiens egl nine homolog 1 (C. elegans) (EGLN1), mRNA [NM_022051]"	hs|1q42.2
A_21_P0004773	-9.32581	NR_038863	NR_038863	LOC285758	"Homo sapiens uncharacterized LOC285758 (LOC285758), non-coding RNA [NR_038863]"	hs|6q21
A_23_P169293	-9.29061	NM_021951	NM_021951	DMRT1	"Homo sapiens doublesex and mab-3 related transcription factor 1 (DMRT1), mRNA [NM_021951]"	hs|9p24.3
A_23_P404059	-2.12433	NM_173493	NM_173493	PASD1	"Homo sapiens PAS domain containing 1 (PASD1), mRNA [NM_173493]"	hs|Xq28
A_33_P3295313	-6.09547	NM_000139	NM_000139	MS4A2	"Homo sapiens membrane-spanning 4-domains, subfamily A, member 2 (Fc fragment of IgE, high affinity I, receptor for; beta polypeptide) (MS4A2), mRNA [NM_000139]"	hs|11q12.1
A_23_P419714	-2.31518	NM_001018072	NM_001018072	BTBD11	"Homo sapiens BTB (POZ) domain containing 11 (BTBD11), transcript variant a, mRNA [NM_001018072]"	hs|12q23.3
A_24_P23546	-15.9073	NM_198956	NM_198956	SP8	"Homo sapiens Sp8 transcription factor (SP8), transcript variant 2, mRNA [NM_198956]"	hs|7p21.1
A_21_P0009355	-2.39838	ENST00000543512		XLOC_012564	"BROAD Institute lincRNA (XLOC_012564), lincRNA [TCONS_00025746]"	hs|17q24.3
A_33_P3346057	-9.77294	NR_026556	NR_026556	ANKRD26P1	"Homo sapiens ankyrin repeat domain 26 pseudogene 1 (ANKRD26P1), non-coding RNA [NR_026556]"	hs|16q11.2
A_33_P3216610	-19.6739	NM_019894	NM_019894	TMPRSS4	"Homo sapiens transmembrane protease, serine 4 (TMPRSS4), transcript variant 1, mRNA [NM_019894]"	hs|11q23.3
A_24_P306304	-2.26895	NM_001045480	NM_001045480	PRAMEF16	"Homo sapiens PRAME family member 16 (PRAMEF16), mRNA [NM_001045480]"	hs|1p36.21
A_21_P0003974	-2.13589	ENST00000505844		XLOC_004308	"Q2NY92_XANOM (Q2NY92) Methyltransferase, partial (3%) [THC2714968]"	hs|5p15.1
A_33_P3361229	-2.29592	NM_152442	NM_152442	RAD9B	"Homo sapiens RAD9 homolog B (S. pombe) (RAD9B), mRNA [NM_152442]"	hs|12q24.11
A_21_P0003861	-8.82258	NR_038838	NR_038838	LOC100506122	"Homo sapiens uncharacterized LOC100506122 (LOC100506122), non-coding RNA [NR_038838]"	hs|4q34.1
A_21_P0000571	-7.54197	NR_028484	NR_028484	C22orf45	"Homo sapiens chromosome 22 open reading frame 45 (C22orf45), transcript variant 1, non-coding RNA [NR_028484]"	hs|22q11.23
A_32_P170547	-2.1683	NM_001007551	NM_001007551	CT45A5	"Homo sapiens cancer/testis antigen family 45, member A5 (CT45A5), transcript variant 1, mRNA [NM_001007551]"	hs|Xq26.3
A_33_P3404676	-4.11099	ENST00000371958		AMOT	angiomotin [Source:HGNC Symbol;Acc:17810] [ENST00000371958]	hs|Xq23
A_33_P3420976	-2.0619	NM_001164442	NM_001164442	FAM159B	"Homo sapiens family with sequence similarity 159, member B (FAM159B), mRNA [NM_001164442]"	hs|5q12.3
A_21_P0012493	-20.9203	NR_015400	NR_015400	LOC255025	"Homo sapiens uncharacterized LOC255025 (LOC255025), non-coding RNA [NR_015400]"	hs|3q11.2
A_33_P3282597	-2.06758	ENST00000399707	AK294916	C18orf45	chromosome 18 open reading frame 45 [Source:HGNC Symbol;Acc:31723] [ENST00000399707]	hs|18q11.2
A_33_P3358815	-2.31479	NM_001081551	NM_001081551	DEFB103A	"Homo sapiens defensin, beta 103A (DEFB103A), mRNA [NM_001081551]"	hs|8p23.1
A_23_P324304	-3.29809	NM_004304	NM_004304	ALK	"Homo sapiens anaplastic lymphoma receptor tyrosine kinase (ALK), mRNA [NM_004304]"	hs|2p23.2
A_23_P81369	-2.61963	NM_033274	NM_033274	ADAM19	"Homo sapiens ADAM metallopeptidase domain 19 (ADAM19), mRNA [NM_033274]"	hs|5q33.3
A_33_P3351686	-3.05114	NM_001114938	NM_001114938	CCDC17	"Homo sapiens coiled-coil domain containing 17 (CCDC17), transcript variant 1, mRNA [NM_001114938]"	hs|1p34.1
A_21_P0005967	-2.23074	ENST00000506428	XR_108912	XLOC_007093	"PREDICTED: Homo sapiens hypothetical LOC100505532 (LOC100505532), miscRNA [XR_108912]"	hs|8q12.1
A_33_P3325897	-2.26674	NM_005373	NM_005373	MPL	"Homo sapiens myeloproliferative leukemia virus oncogene (MPL), mRNA [NM_005373]"	hs|1p34.2
A_33_P3533377	-10.8005	DA571583	DA571583	ZNF847P	"DA571583 HEMBA1 Homo sapiens cDNA clone HEMBA1006880 5', mRNA sequence [DA571583]"	hs|1q42.13
A_21_P0011729	-2.01739	AI222338	AI222338	XLOC_l2_006973	"qh04a10.x1 Soares_NFL_T_GBC_S1 Homo sapiens cDNA clone IMAGE:1843674 3' similar to contains L1.b3 L1 repetitive element ;, mRNA sequence [AI222338]"	hs|19p12
A_21_P0014639	-6.70651	XR_110863	XR_110863	LOC100507071	"PREDICTED: Homo sapiens hypothetical LOC100507071 (LOC100507071), miscRNA [XR_110863]"	hs|8p21.3
A_21_P0011038	-2.08088	XR_109085	XR_109085	LOC100506226	"PREDICTED: Homo sapiens hypothetical LOC100506226, transcript variant 2 (LOC100506226), miscRNA [XR_109085]"	hs|12p13.2
A_23_P327462	-4.61928	NM_173560	NM_173560	RFX6	"Homo sapiens regulatory factor X, 6 (RFX6), mRNA [NM_173560]"	hs|6q22.1
A_21_P0004259	-7.21445	ENST00000520762	CR745728	XLOC_004412	"CR745728 Soares_testis_NHT Homo sapiens cDNA clone IMAGp971N1544 ; IMAGE:727430 5', mRNA sequence [CR745728]"	hs|5q13.1
A_21_P0010359	-8.27718	ENST00000433970	BG202955	XLOC_014228	"RST22323 Athersys RAGE Library Homo sapiens cDNA, mRNA sequence [BG202955]"	hs|22q12.3
A_33_P3270360	-7.24978	NM_001004458	NM_001004458	OR1S1	"Homo sapiens olfactory receptor, family 1, subfamily S, member 1 (OR1S1), mRNA [NM_001004458]"	hs|11q12.1
A_21_P0002107	-2.44965	ENST00000415918	AA626731	XLOC_002339	"ab52a01.r1 Stratagene lung carcinoma 937218 Homo sapiens cDNA clone IMAGE:844392 5', mRNA sequence [AA626731]"	hs|2q22.1
A_23_P370588	-2.17225	NM_024016	NM_024016	HOXB8	"Homo sapiens homeobox B8 (HOXB8), mRNA [NM_024016]"	hs|17q21.32
A_23_P96291	-2.91777	NM_004988	NM_004988	MAGEA1	"Homo sapiens melanoma antigen family A, 1 (directs expression of antigen MZ2-E) (MAGEA1), mRNA [NM_004988]"	hs|Xq28
A_33_P3359923	-6.03793	NM_001144874	NM_001144874	PATE4	"Homo sapiens prostate and testis expressed 4 (PATE4), mRNA [NM_001144874]"	hs|11q24.2
A_23_P410408	-6.34059	NM_175883	NM_175883	OR7D2	"Homo sapiens olfactory receptor, family 7, subfamily D, member 2 (OR7D2), mRNA [NM_175883]"	hs|19p13.2
A_24_P98385	-2.06154	NM_019592	NM_019592	RNF20	"Homo sapiens ring finger protein 20 (RNF20), mRNA [NM_019592]"	hs|9q31.1
A_33_P3379939	-2.34458	NM_018950	NM_018950	HLA-F	"Homo sapiens major histocompatibility complex, class I, F (HLA-F), transcript variant 2, mRNA [NM_018950]"	hs|6p22.1
A_21_P0000361	-2.01084	NR_003021	NR_003021	SNORA79	"Homo sapiens small nucleolar RNA, H/ACA box 79 (SNORA79), small nucleolar RNA [NR_003021]"	hs|14q31.1
A_21_P0008287	-5.59911	ENST00000423922	DB044321	XLOC_010927	"DB044321 TESTI2 Homo sapiens cDNA clone TESTI2032258 5', mRNA sequence [DB044321]"	hs|14q32.2
A_21_P0004029	-15.2034	ENST00000512941	DA173333	XLOC_004466	"DA173333 BRAMY2 Homo sapiens cDNA clone BRAMY2036130 5', mRNA sequence [DA173333]"	hs|5q14.3
A_33_P3282404	-14.2148	NM_033026	NM_033026	PCLO	"Homo sapiens piccolo (presynaptic cytomatrix protein) (PCLO), transcript variant 1, mRNA [NM_033026]"	hs|7q21.11
A_24_P254278	-2.06653	NM_203327	NM_203327	SLC23A2	"Homo sapiens solute carrier family 23 (nucleobase transporters), member 2 (SLC23A2), transcript variant 2, mRNA [NM_203327]"	hs|20p13
A_33_P3217594	-7.41663	AK128250	AK128250	ZNF818P	"Homo sapiens cDNA FLJ46385 fis, clone THYMU2038199. [AK128250]"	hs|19q13.42
A_23_P436284	-2.0962	NM_178859	NM_178859	OSTBETA	"Homo sapiens organic solute transporter beta (OSTBETA), mRNA [NM_178859]"	hs|15q22.31
A_21_P0004917	-2.22158	TCONS_00011912		XLOC_005413	"BROAD Institute lincRNA (XLOC_005413), lincRNA [TCONS_00011912]"	hs|6q21
A_23_P15603	-2.03753	NM_024864	NM_024864	MRM1	"Homo sapiens mitochondrial rRNA methyltransferase 1 homolog (S. cerevisiae) (MRM1), nuclear gene encoding mitochondrial protein, mRNA [NM_024864]"	hs|17q12
A_21_P0011502	-2.35247	NR_024530	NR_024530	RPL23AP7	"Homo sapiens ribosomal protein L23a pseudogene 7 (RPL23AP7), transcript variant 4, non-coding RNA [NR_024530]"	hs|2q13
A_32_P930375	-19.2256	BC022082	BC022082	C8orf68	Homo sapiens cDNA clone IMAGE:4824304. [BC022082]	hs|8p23.3
A_33_P3304242	-11.8137	NM_012144	NM_012144	DNAI1	"Homo sapiens dynein, axonemal, intermediate chain 1 (DNAI1), mRNA [NM_012144]"	hs|9p13.3
A_33_P3219711	-2.07734	ENST00000534863	AY358092	SUMF1	sulfatase modifying factor 1 [Source:HGNC Symbol;Acc:20376] [ENST00000534863]	hs|3p26.2
A_33_P3285992	-2.30453	AK125618	AK125618	VKORC1	"Homo sapiens cDNA FLJ43630 fis, clone SPLEN2030479. [AK125618]"	hs|16p11.2
A_24_P347378	-2.29178	NM_001629	NM_001629	ALOX5AP	"Homo sapiens arachidonate 5-lipoxygenase-activating protein (ALOX5AP), transcript variant 1, mRNA [NM_001629]"	hs|13q12.3
