# Supplementary material for: MicroRNA-944 Affects Cell Growth by Targeting EPHA7 in Non-Small Cell Lung Cancer
Source: Int J Mol Sci. 2016 Sep 26;17(10):1493. doi: 10.3390/ijms17101493 (PMC5085614; doi:10.3390/ijms17101493)
Supplement: Supplementary file 1 [file ijms-17-01493-s001.zip › Additional file 3.pdf]

**Additional file 3.** The differentially expressed genes selected through the integrated analysis of miR944 mediated-mRNA expression profiles with its predicted targets.

| Gene Symbol                 | GenBank      | Gene Name                                                                      | Fold Change | p |
|-----------------------------|--------------|--------------------------------------------------------------------------------|-------------|---|
| <b>Down-regulated genes</b> |              |                                                                                |             |   |
| FUT9                        | NM_006581    | fucosyltransferase 9                                                           | -13.7978    | * |
| AP1S3                       | NM_001039569 | adaptor-related protein complex 1, sigma 3 subunit,                            | -2.3475     | * |
| ZPLD1                       | NM_175056    | zona pellucida-like domain containing 1                                        | -2.1427     | * |
| DBT                         | NM_001918    | dihydrolipoamide branched chain transacylase E2                                | -2.0771     | * |
| TAPT1                       | NM_153365    | transmembrane anterior posterior transformation 1                              | -3.0689     | * |
| EPHA7                       | NM_004440    | EPH receptor A7                                                                | -22.0652    | * |
| MS4A2                       | NM_000139    | membrane-spanning 4-domains, subfamily A, member 2                             | -6.0955     | * |
| PAN3                        | NM_175854    | poly(A) specific ribonuclease subunit homolog                                  | -11.7924    | * |
| PCLO                        | NM_033026    | piccolo                                                                        | -14.2148    | * |
| HLA-F                       | NM_018950    | major histocompatibility complex, class I, F                                   | -2.3446     | * |
| MMP13                       | NM_002427    | matrix metalloproteinase 13                                                    | -5.6270     | * |
| RNF20                       | NM_019592    | ring finger protein 20                                                         | -2.0615     | * |
| KCTD16                      | NM_020768    | potassium channel tetramerisation domain containing 16                         | -2.1983     | * |
| CCDC15                      | NM_025004    | coiled-coil domain containing 15                                               | -5.0194     | * |
| ZNF605                      | NM_183238    | zinc finger protein 605                                                        | -4.1594     | * |
| CDKN2B                      | NM_004936    | cyclin-dependent kinase inhibitor 2B                                           | -2.3499     | * |
| PASD1                       | NM_173493    | PAS domain containing 1                                                        | -2.1243     | * |
| AMOT                        | NM_001113490 | angiomin                                                                       | -4.1110     | * |
| CYP7A1                      | NM_000780    | cytochrome P450, family 7, subfamily A, polypeptide 1                          | -2.5574     | * |
| F5                          | NM_000130    | coagulation factor V                                                           | -5.3073     | * |
| SP8                         | NM_198956    | Sp8 transcription factor                                                       | -15.9073    | * |
| GNAO1                       | NM_138736    | guanine nucleotide binding protein,<br>alpha activating activity polypeptide O | -2.3351     | * |
| GUCA1B                      | NM_002098    | guanylate cyclase activator 1B                                                 | -3.7807     | * |
| BCL11A                      | NM_018014    | B-cell CLL/lymphoma 11A (zinc finger protein)                                  | -6.9443     | * |
| AGPAT4                      | NM_020133    | 1-acylglycerol-3-phosphate O-acyltransferase 4                                 | -2.0476     | * |
| PLXDC1                      | NM_020405    | plexin domain containing 1                                                     | -2.3056     | * |
| PAK7                        | NM_020341    | p21 protein (Cdc42/Rac)-activated kinase 2                                     | -30.6842    | * |
| MPP5                        | NM_022474    | membrane protein, palmitoylated 5                                              | -2.1422     | * |
| SLC7A4                      | NM_004173    | solute carrier family 7, member 4                                              | -2.9090     | * |
| ZNF215                      | NM_013250    | zinc finger protein 215                                                        | -12.9707    | * |
| PRRG3                       | NM_024082    | proline rich Gla 3                                                             | -2.8356     | * |
| SSH2                        | NM_001282130 | slingshot protein phosphatase 2                                                | -2.5703     | * |
| GCNT3                       | NM_004751    | glucosaminyl (N-acetyl) transferase 3, mucin type                              | -2.3665     | * |
| PIGM                        | NM_145167    | phosphatidylinositol glycan anchor biosynthesis, class M                       | -2.0519     | * |
| STXBP5L                     | NM_014980    | syntaxin binding protein 5-like                                                | -3.1841     | * |
| SLC23A2                     | NM_203327    | solute carrier family 23, member 2                                             | -2.0665     | * |
| MORC1                       | NM_014429    | MORC family CW-type zinc finger 1                                              | -7.6522     | * |

Additional file 3. *Cont.*

| Gene Symbol               | GenBank      | Gene Name                                                                | Fold Change | <i>p</i> |
|---------------------------|--------------|--------------------------------------------------------------------------|-------------|----------|
| <b>Up-regulated genes</b> |              |                                                                          |             |          |
| MIER3                     | NM_152622    | mesoderm induction early response 1, family member 3                     | 4.0154      | *        |
| RTKN2                     | NM_145307    | rhotekin 2                                                               | 3.1024      | *        |
| GRM8                      | NM_000845    | glutamate receptor, metabotropic 8                                       | 6.6306      | *        |
| IL8                       | NM_000584    | interleukin 8                                                            | 16.7740     | *        |
| BRWD1                     | NM_018963    | bromodomain and WD repeat domain containing 1                            | 2.6391      | *        |
| BNC2                      | NM_017637    | basonuclin 2                                                             | 2.0136      | *        |
| TLE4                      | NM_001083962 | transcription factor 4                                                   | 6.3657      | *        |
| ARHGAP26                  | NM_004815    | Rho GTPase activating protein 26                                         | 11.2820     | *        |
| TOMM70A                   | NM_014820    | translocase of outer mitochondrial membrane 70 homolog A (S. cerevisiae) | 2.2392      | *        |
| STAG2                     |              | stromal antigen 2                                                        | 2.5660      | *        |
| RAPGEF4                   | NM_007023    | Rap guanine nucleotide exchange factor (GEF) 4                           | 2.521       | *        |
| ZNF618                    | NM_133374    | zinc finger protein 618                                                  | 2.1561      | *        |
| UPP2                      | NM_173355    | uridine phosphorylase 2                                                  | 21.5104     | *        |
| DPYD                      | NM_001160301 | dihydropyrimidine dehydrogenase                                          | 2.3433      | *        |
| ECM2                      |              | extracellular matrix protein 2, female organ and adipocyte specific      | 6.9829      | *        |
| DISC1                     | NM_001164549 | disrupted in schizophrenia 1                                             | 2.3467      | *        |
| BBS9                      | NM_014451    | Bardet-Biedl syndrome 9                                                  | 3.4804      | *        |
| GUCA1B                    | NM_002098    | guanylate cyclase activator 1B                                           | 6.2035      | *        |
| ITK                       | NM_005546    | IL2-inducible T-cell kinase                                              | 9.0695      | *        |
| FOXJ2                     | NM_018416    | forkhead box J2                                                          | 2.0712      | *        |
| KLHL14                    | NM_020805    | kelch-like 14 (Drosophila)                                               | 3.8543      | *        |
| SCN1A                     | NM_006920    | sodium channel, voltage-gated, type I, alpha subunit                     | 11.5761     | *        |
| IQCH                      | NM_022784    | IQ motif containing H                                                    | 7.4185      | *        |
| TEC                       | NM_003215    | tec protein tyrosine kinase                                              | 3.2338      | *        |
| TRPM8                     | NM_024080    | transient receptor potential cation channel, subfamily M, member 8       | 4.1876      | *        |
| MLPH                      | NM_024101    | melanophilin                                                             | 5.0901      | *        |
| ZNF750                    | NM_024702    | zinc finger protein 750                                                  | 12.5551     | *        |
| VASH2                     | NM_024749    | vasohibin 2                                                              | 2.5064      | *        |
| AXIN2                     | NM_004655    | axin 2                                                                   | 2.0091      | *        |
| LRAT                      | NM_004744    | lecithin retinol acyltransferase                                         | 5.8564      | *        |

\*  $p < 0.05$ .
