# Supplementary material for: MicroRNA-944 Affects Cell Growth by Targeting EPHA7 in Non-Small Cell Lung Cancer
Source: Int J Mol Sci. 2016 Sep 26;17(10):1493. doi: 10.3390/ijms17101493 (PMC5085614; doi:10.3390/ijms17101493)
Supplement: Supplementary file 1 [file ijms-17-01493-s001.zip › Additional file 7.pdf]

**Additional file 7A.** Clinical and pathologic information of patients.

| Case No. | Gender | Age | Smoking | Histological Type | TNM    | Stage |
|----------|--------|-----|---------|-------------------|--------|-------|
| 1        | Male   | 42  | YES     | AC                | T2N1M0 | IIB   |
| 2        | Male   | 51  | YES     | AC                | T2N0M0 | IB    |
| 3        | Female | 56  | NO      | AC                | T2N1M0 | IIB   |
| 4        | Male   | 39  | NO      | SCC               | T2N0M0 | IB    |
| 5        | Female | 66  | NO      | AC                | T1N0M0 | IA    |
| 6        | Male   | 76  | YES     | SCC               | T2N0M0 | IB    |
| 7        | Female | 42  | NO      | AC                | T0M0N0 | IA    |
| 8        | Female | 56  | NO      | AC                | T2N0M0 | IB    |
| 9        | Female | 58  | NO      | AC                | T2N1M0 | IIB   |
| 10       | Male   | 44  | YES     | AC                | T1N0M0 | IA    |
| 11       | Female | 62  | NO      | AC                | T2N0M0 | IB    |
| 12       | Male   | 39  | YES     | AC                | T1N1M0 | IIA   |
| 13       | Female | 57  | YES     | AC                | T2N2M0 | IIIA  |
| 14       | Male   | 43  | YES     | AC                | T2N1M0 | IIB   |
| 15       | Male   | 70  | YES     | SCC               | T2N0M0 | IB    |
| 16       | Male   | 66  | NO      | SCC               | T2N0M0 | IB    |
| 17       | Male   | 62  | YES     | AC                | T1N1M0 | IIA   |
| 18       | Male   | 69  | YES     | AC                | T0M0N0 | IA    |
| 19       | Male   | 69  | YES     | AC                | T2N0M0 | IB    |
| 20       | Female | 50  | NO      | AC                | T2N0M0 | IB    |
| 21       | Female | 37  | NO      | AC                | T2N0M0 | IB    |
| 22       | Female | 52  | NO      | AC                | T2N0M0 | IB    |
| 23       | Male   | 61  | YES     | AC                | T2N1M0 | IIB   |
| 24       | Female | 40  | NO      | AC                | T2N0M0 | IB    |
| 25       | Male   | 67  | YES     | SCC               | T1N0M0 | IA    |
| 26       | Female | 49  | NO      | LB                | None   | None  |
| 27       | Male   | 58  | YES     | IP                | None   | None  |
| 28       | Male   | 57  | YES     | LB                | None   | None  |
| 29       | Male   | 56  | YES     | IP                | None   | None  |
| 30       | Male   | 47  | YES     | IP                | None   | None  |
| 31       | Male   | 64  | NO      | IP                | None   | None  |
| 32       | Male   | 61  | YES     | IP                | None   | None  |
| 33       | Male   | 70  | YES     | IP                | None   | None  |

AC, adenocarcinomas; SCC, squamous cell carcinomas; IP, inflammatory pseudotumor; LB, lung bullous; No. 1–25, NSCLC patients; No. 26–33, patients with lung bullous or inflammatory pseudotumor.

**Additional file 7B.** Clinical and pathologic information of lung cancer patients (paired cancer and match normal tissues).

| Case No. | Gender | Age | Smoking | Histological Type | TNM    | Stage |
|----------|--------|-----|---------|-------------------|--------|-------|
| 1        | M      | 63  | NO      | SCC               | T2N0M0 | IB    |
| 2        | M      | 43  | YES     | SCC               | T2N1M0 | IIB   |
| 3        | M      | 55  | NO      | SCC               | T2N2M0 | IIIA  |
| 4        | FM     | 69  | NO      | SCC               | T2N2M0 | IIIA  |
| 5        | FM     | 60  | NO      | AC                | T2N0M0 | IB    |
| 6        | FM     | 53  | NO      | AC                | T2N0M0 | IB    |
| 7        | FM     | 39  | NO      | AC                | T2N0M0 | IB    |
| 8        | FM     | 42  | NO      | AC                | T0N0M0 | IA    |
| 9        | M      | 44  | YES     | AC                | T1N0M0 | IA    |
| 10       | FM     | 55  | NO      | AC                | T0N0M0 | IA    |
| 11       | FM     | 36  | NO      | AC                | T2N0M0 | IB    |
| 12       | FM     | 60  | NO      | AC                | T2N0M0 | IB    |
| 13       | M      | 49  | YES     | AC                | T2N0M0 | IB    |
| 14       | FM     | 48  | NO      | AC                | T2N0M0 | IB    |
| 15       | FM     | 50  | NO      | AC                | T2N0M0 | IB    |

M, male; F, female; SCC, squamous cell carcinomas; AC, adenocarcinomas.
