# Supplementary material for: MicroRNA-944 Affects Cell Growth by Targeting EPHA7 in Non-Small Cell Lung Cancer
Source: Int J Mol Sci. 2016 Sep 26;17(10):1493. doi: 10.3390/ijms17101493 (PMC5085614; doi:10.3390/ijms17101493)
Supplement: Supplementary file 1 [file ijms-17-01493-s001.zip › Additional file 8.pdf]

**Additional file 8.** The primers used in this study.

| <b>Plasmid Construction</b> | <b>Forward Primers (5'–3');<br/>Reverse Primers (5'–3')</b>           |
|-----------------------------|-----------------------------------------------------------------------|
| EPHA7 3'-UTR                | CTAGCTAGCTCGGATCCATACATACTATAAGGC<br>ACT;GAAGATCTGGAAAGACACCGTTTGCATG |
| <b>QRT-PCR Analysis</b>     | <b>Forward Primers (5'–3');<br/>Reverse Primers (5'–3')</b>           |
| EPHA7                       | GTGAAGATGGGTATTACAGGGC;<br>CAACTGCACCGCTTACACAAT                      |
| GAPDH                       | TGTTGCCATCAATGACCCCTT;<br>CTCCACGACGTACTCAGCG                         |

For miRNAs expression analysis, the forward primers of miR-944 were purchased from Guangzhou RiboBio Co., Ltd; the U6 and miRNA reverse primers were purchased from Qiagen, Hilden, Germany.
